# Supplementary material for: Conditional activation of Pik3caH1047R in a knock-in mouse model promotes mammary tumorigenesis and emergence of mutations
Source: PubMed Central journal article supplement — Oncogene. 2012 Feb 27;32(3):318–26. doi: 10.1038/onc.2012.53 (PMC3550595; doi:10.1038/onc.2012.53), 2012-02-27
Supplement: onc201253x3.pdf [file onc201253x3.pdf]

## Supplementary Tables

**Supplementary Table 1.** Genotypes of progenies obtained from *Pik3ca*<sup>e20mwt/+</sup> x *Pik3ca*<sup>e20mwt/+</sup> intercross

**Supplementary Table 2.** Samples used for genomic analysis

**Supplementary Table 3.** Predicted somatic mutations in tumors

**Supplementary Table 4.** Regions showing copy number alterations in the tumor genome

**Supplementary Table 5.** *Trp53* sequencing primers

**Supplementary Table 1 Genotypes of progenies obtained from  $Pik3ca^{e20mwt/+}$  x  $Pik3ca^{e20mwt/+}$  intercross**

**Line 1 Intercross:  $PIK3CA^{e20mwt/+}$  x  $PIK3CA^{e20mwt/+}$**

|          | <b>Genotypes</b>     |                 |            |
|----------|----------------------|-----------------|------------|
|          | <b>e20mwt/e20mwt</b> | <b>e20mwt/+</b> | <b>+/+</b> |
| Observed | 22                   | 51              | 26         |
| Expected | 24.75                | 49.5            | 24.75      |

Chi squared equals 0.414 with 2 degrees of freedom. The two-tailed P value equals 0.8130

**Line 2 Intercross:  $PIK3CA^{e20mwt/+}$  x  $PIK3CA^{e20mwt/+}$**

|          | <b>Genotypes</b>     |                 |            |
|----------|----------------------|-----------------|------------|
|          | <b>e20mwt/e20mwt</b> | <b>e20mwt/+</b> | <b>+/+</b> |
| Observed | 11                   | 20              | 6          |
| Expected | 9.25                 | 18.5            | 9.25       |

Chi squared equals 1.595 with 2 degrees of freedom. The two-tailed P value equals 0.4505.

**Supplementary Table 2. Samples used for genomic analysis**

| No | Sample ID | Sample Type          | Histology      | Exome | Expression | CGH | Sanger Sequencing |
|----|-----------|----------------------|----------------|-------|------------|-----|-------------------|
| 1  | 155       | Tumor                | Adenocarcinoma | x     | x          | x   |                   |
| 2  | 358       | Tumor                | Adenocarcinoma | x     |            | x   |                   |
| 3  | 359       | Tumor                | Adenocarcinoma |       | x          |     |                   |
| 4  | 594       | Tumor                | Adenocarcinoma | x     |            | x   |                   |
| 5  | 155-p1-1  | Tumor                | Adenocarcinoma |       | x          | x   |                   |
| 6  | 155-p1-3  | Tumor                | Adenocarcinoma |       | x          | x   |                   |
| 7  | 357-p1    | Tumor                | Adenocarcinoma |       | x          | x   |                   |
| 8  | 145       | Tumor                | Fibroadenoma   | x     |            |     |                   |
| 9  | 196       | Tumor                | Fibroadenoma   | x     |            | x   |                   |
| 10 | 219       | Tumor                | Fibroadenoma   | x     |            | x   |                   |
| 11 | 317       | Tumor                | Fibroadenoma   | x     | x          | x   |                   |
| 12 | 326       | Tumor                | Fibroadenoma   | x     | x          | x   |                   |
| 13 | 352       | Tumor                | Fibroadenoma   | x     | x          | x   |                   |
| 14 | 612       | Tumor                | Fibroadenoma   | x     |            | x   |                   |
| 15 | 357       | Tumor                | Firboadenoma   | x     | x          | x   |                   |
| 16 | 628       | Tumor                | Firboadenoma   |       | x          |     |                   |
| 17 | 113       | Tumor                | spindle cell   |       |            |     | x                 |
| 18 | 323       | Tumor                | Spindle Cell   | x     | x          | x   |                   |
| 19 | 323-p1    | Tumor                | Spindle Cell   |       | x          | x   |                   |
| 20 | 323-p2    | Tumor                | Spindle Cell   |       | x          | x   |                   |
| 21 | 323-p3    | Tumor                | Spindle Cell   |       | x          | x   |                   |
| 22 | 2761      | sperm                | Normal         | x     |            |     |                   |
| 23 | 317_Mg_MC | Normal_Mammary gland | Normal         |       | x          |     |                   |
| 24 | 326_Mg_MC | Normal_Mammary gland | Normal         |       | x          |     |                   |
| 25 | 460_Mg_C  | Normal_Mammary gland | Normal         |       | x          |     |                   |
| 26 | 461_Mg_C  | Normal_Mammary gland | Normal         |       | x          |     |                   |
| 27 | 628_Mg_MC | Normal_Mammary gland | Normal         |       | x          |     |                   |
| 28 | 707_Mg_C  | Normal_Mammary gland | Normal         |       | x          |     |                   |
| 29 | 155_kd_MC | Normal_Kidney        | Normal         | x     |            |     |                   |
| 30 | 219_kd_MC | Normal_Kidney        | normal         | x     |            | x   |                   |

**Supplementary Table 2. Samples used for genomic analysis**

| No | Sample ID | Sample Type   | Histology | Exome | Expression | CGH | Sanger Sequencing |
|----|-----------|---------------|-----------|-------|------------|-----|-------------------|
| 31 | 2762-21   | Normal_Kidney | Normal    | x     |            |     |                   |
| 32 | 2762-5    | Normal_Kidney | Normal    | x     |            |     |                   |
| 33 | 2828-377  | Normal_Kidney | Normal    | x     |            |     |                   |
| 34 | 357_kd_MC | Normal_Kidney | Normal    | x     |            |     |                   |
| 35 | 358_kd_MC | Normal_Kidney | Normal    | x     |            | x   |                   |
| 36 | SCID1     | Normal_Kidney | normal    | x     |            |     |                   |
| 37 | SCID6     | Normal_Kidney | Normal    | x     |            |     |                   |
| 38 | 317_kd_MC | Normal_Kidney | normal    | x     |            | x   |                   |
| 39 | 326_kd_MC | Normal_Kidney | normal    | x     |            | x   |                   |

**Supplementary Table 3. Predicted somatic mutations in tumors**

| Sample Id                | Histological type | GeneName | DB                 | Gene               | Transcript            | Consequence | Position_n_cDNA | Amino_a            |           |    |        | Position               | Ref  | Var    | Effect (SIFT)     | Median       |             |                   | Score (Polyphen) |
|--------------------------|-------------------|----------|--------------------|--------------------|-----------------------|-------------|-----------------|--------------------|-----------|----|--------|------------------------|------|--------|-------------------|--------------|-------------|-------------------|------------------|
|                          |                   |          |                    |                    |                       |             |                 | Position_n_protein | cid_chan  | me | Chromo |                        |      |        |                   | Score (SIFT) | Info (SIFT) | Effect (Polyphen) |                  |
| 155 Adeno Carcinoma      | 170086D15Rik      | MGI      | ENSMUSG00000020548 | ENSMUST00000108696 | NON_SYNONYMOUS_CODING | 388         | 113 K/R         | chr11              | 64966116  | T  | C      | No sufficient homology | -    | -      | benign            | 0.675        |             |                   |                  |
| 155 Adeno Carcinoma      | 2210408121Rik     | MGI      | ENSMUSG00000095588 | ENSMUST00000095588 | NON_SYNONYMOUS_CODING | 2060        | 676 R/Q         | chr13              | 77407077  | G  | A      | TOLERATED              | 0.36 | 4.32   | benign            | 1.007        |             |                   |                  |
| 155 Adeno Carcinoma      | C230081A13Rik     | MGI      | ENSMUSG00000074305 | ENSMUST00000061552 | NON_SYNONYMOUS_CODING | 733         | 88 E/D          | chr9               | 56108186  | C  | G      | DELETERIOUS            | 0    | 4.32   | benign            | 1.245        |             |                   |                  |
| 155 Adeno Carcinoma      | Ccdc36            | MGI      | ENSMUSG00000047220 | ENSMUST00000076592 | NON_SYNONYMOUS_CODING | 1124        | 375 H/Y         | chr9               | 108307708 | G  | A      | DELETERIOUS            | 0    | 4.32   | probably damaging | 2.056        |             |                   |                  |
| 155 Adeno Carcinoma      | Cmah              | MGI      | ENSMUSG00000016756 | ENSMUST00000050859 | NON_SYNONYMOUS_CODING | 1197        | 220 V/I         | chr13              | 24527021  | G  | A      | DELETERIOUS            | 0.03 | 3.46   | benign            | 1.204        |             |                   |                  |
| 155 Adeno Carcinoma      | Hip1              | MGI      | ENSMUSG00000039959 | ENSMUST00000060311 | NON_SYNONYMOUS_CODING | 872         | 284 R/L         | chr5               | 135916147 | C  | A      | DELETERIOUS            | 0.04 | 2.85   | probably damaging | 2.178        |             |                   |                  |
| 155 Adeno Carcinoma      | Klh5              | MGI      | ENSMUSG00000054920 | ENSMUST00000101191 | NON_SYNONYMOUS_CODING | 1238        | 358 L/F         | chr5               | 65540002  | C  | T      | DELETERIOUS            | 0    | 2.74   | probably damaging | 2.05         |             |                   |                  |
| 155 Adeno Carcinoma      | Krt10             | MGI      | ENSMUSG00000019761 | ENSMUST00000103131 | NON_SYNONYMOUS_CODING | 43          | 4 L/R           | chr11              | 99250636  | A  | C      | DELETERIOUS            | 0    | 4.32   | unknown           | -            |             |                   |                  |
| 155 Adeno Carcinoma      | L3mbtl            | MGI      | ENSMUSG00000035576 | ENSMUST00000035751 | NON_SYNONYMOUS_CODING | 1342        | 367 A/T         | chr2               | 162786773 | G  | A      | TOLERATED              | 0.27 | 2.78   | benign            | 1.177        |             |                   |                  |
| 155 Adeno Carcinoma      | Med1              | MGI      | ENSMUSG00000018160 | ENSMUST00000107545 | NON_SYNONYMOUS_CODING | 4253        | 1348 T/M        | chr11              | 98017240  | G  | A      | TOLERATED              | 0.52 | 3.59   | unknown           | -            |             |                   |                  |
| 155 Adeno Carcinoma      | Med24             | MGI      | ENSMUSG00000017210 | ENSMUST00000100500 | NON_SYNONYMOUS_CODING | 813         | 234 A/V         | chr11              | 98577755  | G  | A      | TOLERATED              | 0.38 | 3.37   | benign            | 1.099        |             |                   |                  |
| 155 Adeno Carcinoma      | Plk1              | MGI      | ENSMUSG00000030867 | ENSMUST00000033154 | NON_SYNONYMOUS_CODING | 1148        | 364 R/W         | chr7               | 12931164  | C  | T      | DELETERIOUS            | 0.02 | 2.74   | benign            | 1.397        |             |                   |                  |
| 155 Adeno Carcinoma      | Setd2             | MGI      | ENSMUSG00000044791 | ENSMUST00000153838 | NON_SYNONYMOUS_CODING | 4114        | 1358 N/K        | chr9               | 110453696 | C  | G      | DELETERIOUS            | 0    | 4.32   | possibly damaging | 1.611        |             |                   |                  |
| 155 Adeno Carcinoma      | Sgca              | MGI      | ENSMUSG00000001508 | ENSMUST00000103162 | NON_SYNONYMOUS_CODING | 731         | 160 A/S         | chr11              | 94832661  | C  | A      | TOLERATED              | 0.49 | 2.86   | benign            | 0.373        |             |                   |                  |
| 155 Adeno Carcinoma      | Smg1              | MGI      | ENSMUSG00000030655 | ENSMUST00000032891 | NON_SYNONYMOUS_CODING | 1839        | 498 V/I         | chr7               | 12533945  | C  | T      | DELETERIOUS            | 0    | 3.53   | benign            | 0.225        |             |                   |                  |
| 155 Adeno Carcinoma      | Tpr               | MGI      | ENSMUSG00000060005 | ENSMUST00000064506 | NON_SYNONYMOUS_CODING | 5804        | 1831 E/K        | chr1               | 152283895 | G  | A      | DELETERIOUS            | 0.04 | 3.49   | possibly damaging | 1.507        |             |                   |                  |
| 155 Adeno Carcinoma      | Tssk2             | MGI      | ENSMUSG00000045521 | ENSMUST00000055374 | NON_SYNONYMOUS_CODING | 832         | 251 R/C         | chr16              | 17899578  | C  | T      | DELETERIOUS            | 0    | 2.75   | benign            | 0.891        |             |                   |                  |
| 155 Adeno Carcinoma      | Zfc3h1            | MGI      | ENSMUSG00000034163 | ENSMUST00000036044 | NON_SYNONYMOUS_CODING | 5928        | 1897 A/S        | chr10              | 114867761 | G  | T      | DELETERIOUS            | 0    | 4.32   | benign            | 1.002        |             |                   |                  |
| 155 Adeno Carcinoma      | Zp2               | MGI      | ENSMUSG00000030911 | ENSMUST00000033207 | NON_SYNONYMOUS_CODING | 1676        | 549 A/V         | chr7               | 127278693 | G  | A      | TOLERATED              | 0.61 | 2.79   | benign            | 1.097        |             |                   |                  |
| 358 Adeno Carcinoma      | Cacna1g           | MGI      | ENSMUSG00000020866 | ENSMUST00000107789 | NON_SYNONYMOUS_CODING | 6917        | 2145 S/F        | chr11              | 94271171  | G  | A      | DELETERIOUS            | 0    | 3.43   | possibly damaging | 1.838        |             |                   |                  |
| 358 Adeno Carcinoma      | Olfrl016          | MGI      | ENSMUSG00000075209 | ENSMUST00000099915 | NON_SYNONYMOUS_CODING | 437         | 146 A/V         | chr2               | 85639989  | G  | A      | TOLERATED              | 0.62 | 2.75   | benign            | 0.171        |             |                   |                  |
| 358 Adeno Carcinoma      | Syp               | MGI      | ENSMUSG00000031144 | ENSMUST00000069520 | NON_SYNONYMOUS_CODING | 508         | 96 F/I          | chrX               | 7221285   | T  | A      | DELETERIOUS            | 0.03 | 2.89   | probably damaging | 2.031        |             |                   |                  |
| 358 Adeno Carcinoma      | Trp53             | MGI      | ENSMUSG00000059552 | ENSMUST00000108658 | NON_SYNONYMOUS_CODING | 703         | 192 I/N         | chr11              | 69402152  | T  | A      | DELETERIOUS            | 0    | 2.77   | probably damaging | 2.796        |             |                   |                  |
| 594 Adeno Carcinoma      | Lilra6            | MGI      | ENSMUSG00000030427 | ENSMUST00000073970 | NON_SYNONYMOUS_CODING | 1807        | 600 D/N         | chr7               | 3863069   | C  | T      | TOLERATED              | 0.31 | 2.79   | benign            | 0.161        |             |                   |                  |
| 594 Adeno Carcinoma      | Mrps30            | MGI      | ENSMUSG00000021731 | ENSMUST00000022245 | NON_SYNONYMOUS_CODING | 379         | 121 A/T         | chr13              | 119175681 | C  | T      | TOLERATED              | 0.45 | 2.82   | benign            | 0.201        |             |                   |                  |
| 594 Adeno Carcinoma      | Pcdha5            | MGI      | ENSMUSG00000007440 | ENSMUST00000115662 | NON_SYNONYMOUS_CODING | 64          | 22 A/T          | chr18              | 37099035  | G  | A      | TOLERATED              | 0.34 | 2.84   | benign            | 0.211        |             |                   |                  |
| 594 Adeno Carcinoma      | Pcdhb5            | MGI      | ENSMUSG00000063687 | ENSMUST00000078271 | NON_SYNONYMOUS_CODING | 677         | 163 S/R         | chr18              | 37480711  | C  | A      | TOLERATED              | 0.53 | 2.77   | benign            | 0.238        |             |                   |                  |
| 594 Adeno Carcinoma      | Rcn3              | MGI      | ENSMUSG00000019539 | ENSMUST00000117546 | NON_SYNONYMOUS_CODING | 781         | 220 V/L         | chr7               | 52340295  | C  | A      | DELETERIOUS            | 0.02 | 2.84   | benign            | 0.798        |             |                   |                  |
| 594 Adeno Carcinoma      | Rcor3             | MGI      | ENSMUSG00000037395 | ENSMUST00000073279 | NON_SYNONYMOUS_CODING | 510         | 133 A/V         | chr1               | 193949859 | G  | A      | TOLERATED              | 0.1  | 2.89   | benign            | 1.222        |             |                   |                  |
| 594 Adeno Carcinoma      | Sgna2             | MGI      | ENSMUSG00000057738 | ENSMUST00000113719 | NON_SYNONYMOUS_CODING | 1322        | 365 R/C         | chr2               | 29843861  | C  | T      | DELETERIOUS            | 0    | 2.87   | probably damaging | 2.74         |             |                   |                  |
| 594 Adeno Carcinoma      | Usp2              | MGI      | ENSMUSG00000032010 | ENSMUST00000034508 | NON_SYNONYMOUS_CODING | 733         | 164 D/E         | chr9               | 43883981  | T  | G      | DELETERIOUS            | 0    | 4.32   | benign            | 0.9          |             |                   |                  |
| 155-p1-1 Adeno Carcinoma | 1700014B07Rik     | MGI      | ENSMUSG00000048749 | ENSMUST00000056627 | NON_SYNONYMOUS_CODING | 237         | 79 M/I          | chr2               | 6243581   | C  | T      | -                      | -    | -      | -                 |              |             |                   |                  |
| 155-p1-1 Adeno Carcinoma | 1700014B07Rik     | MGI      | ENSMUSG00000048749 | ENSMUST00000056627 | NON_SYNONYMOUS_CODING | 236         | 79 M/R          | chr2               | 6243582   | A  | C      | -                      | -    | -      | -                 |              |             |                   |                  |
| 155-p1-1 Adeno Carcinoma | 1700081L11Rik     | MGI      | ENSMUSG00000018412 | ENSMUST00000106972 | NON_SYNONYMOUS_CODING | 3559        | 970 S/I         | chr11              | 104196924 | C  | A      | TOLERATED              | 0.12 | 3.53   | possibly damaging | 1.989        |             |                   |                  |
| 155-p1-1 Adeno Carcinoma | 1700086D15Rik     | MGI      | ENSMUSG00000020548 | ENSMUST00000108696 | NON_SYNONYMOUS_CODING | 388         | 113 K/R         | chr11              | 64966116  | T  | C      | -                      | -    | benign | 0.675             |              |             |                   |                  |
| 155-p1-1 Adeno Carcinoma | 2210408121Rik     | MGI      | ENSMUSG00000071252 | ENSMUST00000095588 | NON_SYNONYMOUS_CODING | 2060        | 676 R/Q         | chr13              | 77407077  | G  | A      | TOLERATED              | 0.36 | 4.32   | benign            | 1.007        |             |                   |                  |
| 155-p1-1 Adeno Carcinoma | Abca16            | MGI      | ENSMUSG00000051900 | ENSMUST00000120490 | NON_SYNONYMOUS_CODING | 870         | 279 R/W         | chr7               | 127577108 | C  | T      | DELETERIOUS            | 0    | 2.81   | probably damaging | 2.348        |             |                   |                  |
| 155-p1-1 Adeno Carcinoma | Aldh3a1           | MGI      | ENSMUSG00000019102 | ENSMUST00000108716 | NON_SYNONYMOUS_CODING | 627         | 154 I/N         | chr11              | 61027753  | T  | A      | DELETERIOUS            | 0    | 2.79   | probably damaging | 2.827        |             |                   |                  |
| 155-p1-1 Adeno Carcinoma | Aldh3a1           | MGI      | ENSMUSG00000019102 | ENSMUST00000108716 | NON_SYNONYMOUS_CODING | 1080        | 305 H/R         | chr11              | 61029887  | A  | G      | TOLERATED              | 0.29 | 2.79   | possibly damaging | 1.938        |             |                   |                  |
| 155-p1-1 Adeno Carcinoma | Alox15            | MGI      | ENSMUSG00000018924 | ENSMUST00000019068 | NON_SYNONYMOUS_CODING | 1730        | 568 K/N         | chr11              | 70158430  | T  | G      | TOLERATED              | 1    | 2.77   | benign            | 0.847        |             |                   |                  |
| 155-p1-1 Adeno Carcinoma | Alox15            | MGI      | ENSMUSG00000018924 | ENSMUST00000019068 | NON_SYNONYMOUS_CODING | 1729        | 568 K/T         | chr11              | 70158431  | T  | G      | TOLERATED              | 1    | 2.77   | benign            | 0.847        |             |                   |                  |
| 155-p1-1 Adeno Carcinoma | Bpi13             | MGI      | ENSMUSG00000068009 | ENSMUST00000088955 | NON_SYNONYMOUS_CODING | 765         | 207 S/P         | chr2               | 153731777 | T  | C      | TOLERATED              | 0.08 | 2.77   | possibly damaging | 1.798        |             |                   |                  |
| 155-p1-1 Adeno Carcinoma | C2cd2             | MGI      | ENSMUSG00000045975 | ENSMUST00000060801 | NON_SYNONYMOUS_CODING | 521         | 73 A/G          | chr16              | 98143708  | G  | C      | TOLERATED              | 0.29 | 3.05   | benign            | 1.262        |             |                   |                  |
| 155-p1-1 Adeno Carcinoma | Ccdc36            | MGI      | ENSMUSG00000047220 | ENSMUST00000076592 | NON_SYNONYMOUS_CODING | 1124        | 375 H/Y         | chr9               | 108307708 | G  | A      | DELETERIOUS            | 0    | 4.32   | probably damaging | 2.056        |             |                   |                  |
| 155-p1-1 Adeno Carcinoma | Cmah              | MGI      | ENSMUSG00000016756 | ENSMUST00000050859 | NON_SYNONYMOUS_CODING | 1197        | 220 V/I         | chr13              | 24527021  | G  | A      | DELETERIOUS            | 0.03 | 3.46   | benign            | 1.204        |             |                   |                  |
| 155-p1-1 Adeno Carcinoma | Corin             | MGI      | ENSMUSG00000005220 | ENSMUST00000005352 | NON_SYNONYMOUS_CODING | 2878        | 940 R/C         | chr5               | 72696309  | G  | A      | TOLERATED              | 0.17 | 2.83   | probably damaging | 2.257        |             |                   |                  |
| 155-p1-1 Adeno Carcinoma | Dock3             | MGI      | ENSMUSG00000039716 | ENSMUST00000044532 | NON_SYNONYMOUS_CODING | 4438        | 1363 K/E        | chr9               | 106832371 | T  | C      | TOLERATED              | 0.1  | 2.77   | benign            | 1.312        |             |                   |                  |
| 155-p1-1 Adeno Carcinoma | Fam83g            | MGI      | ENSMUSG00000042377 | ENSMUST00000093019 | NON_SYNONYMOUS_CODING | 1746        | 544 P/L         | chr11              | 61516774  | C  | T      | DELETERIOUS            | 0    | 4.32   | probably damaging | 2.494        |             |                   |                  |
| 155-p1-1 Adeno Carcinoma | Gm10862           | MGI      | ENSMUSG00000075554 | ENSMUST00000100454 | NON_SYNONYMOUS_CODING | 215         | 72 R/L          | chr2               | 4013026   | G  | T      | -                      | -    | -      | -                 |              |             |                   |                  |
| 155-p1-1 Adeno Carcinoma | Heatr6            | MGI      | ENSMUSG00000000976 | ENSMUST00000001002 | NON_SYNONYMOUS_CODING | 928         | 301 P/T         | chr11              | 83578487  | C  | A      | TOLERATED              | 0.13 | 3.37   | probably damaging | 2.061        |             |                   |                  |
| 155-p1-1 Adeno Carcinoma | Helb              | MGI      | ENSMUSG00000020228 | ENSMUST00000020449 | NON_SYNONYMOUS_CODING | 133         | 3 R/K           | chr10              | 119549911 | C  | T      | DELETERIOUS            | 0    | 4.32   | benign            | 1.128        |             |                   |                  |
| 155-p1-1 Adeno Carcinoma | Hip1              | MGI      | ENSMUSG00000039959 | ENSMUST00000060311 | NON_SYNONYMOUS_CODING | 872         | 284 R/L         | chr5               | 135916147 | C  | A      | DELETERIOUS            | 0.04 | 2.85   | probably damaging | 2.178        |             |                   |                  |
| 155-p1-1 Adeno Carcinoma | Ilrn              | MGI      | ENSMUSG00000026981 | ENSMUST00000028358 | NON_SYNONYMOUS_CODING | 121         | 31 P/S          | chr2               | 52192500  | C  | T      | -                      | -    | -      | -                 |              |             |                   |                  |
| 155-p1-1 Adeno Carcinoma | Ith5              | MGI      | ENSMUSG00000025780 | ENSMUST00000026886 | NON_SYNONYMOUS_CODING | 467         | 124 D/E         | chr2               | 10108654  | T  | A      | TOLERATED              | 1    | 2.81   | benign            | 1.342        |             |                   |                  |
| 155-p1-1 Adeno Carcinoma | Ith5              | MGI      | ENSMUSG00000025780 | ENSMUST00000026886 | NON_SYNONYMOUS_CODING | 1278        | 395 D/N         | chr2               | 10160263  | G  | A      | TOLERATED              | 0.13 | 2.78   | benign            | 1.231        |             |                   |                  |
| 155-p1-1 Adeno Carcinoma | Klh5              | MGI      | ENSMUSG00000054920 | ENSMUST00000101191 | NON_SYNONYMOUS_CODING | 1238        | 358 L/F         | chr5               | 65540002  | C  | T      | DELETERIOUS            | 0    | 2.76   | probably damaging | 2.05         |             |                   |                  |
| 155-p1-1 Adeno Carcinoma | Krt10             | MGI      | ENSMUSG00000019761 | ENSMUST00000103131 | NON_SYNONYMOUS_CODING | 43          | 4 L/R           | chr11              | 99250636  | A  | C      | DELETERIOUS            | 0    | 4.32   | unknown           | -            |             |                   |                  |
| 155-p1-1 Adeno Carcinoma | L3mbtl            | MGI      | ENSMUSG00000035576 | ENSMUST00000035751 | NON_SYNONYMOUS_CODING | 1342        | 367 A/T         | chr2               | 162786773 | G  | A      | TOLERATED              | 0.27 | 2.78   | benign            | 1.177        |             |                   |                  |
| 155-p1-1 Adeno Carcinoma | Lgals1            | MGI      | ENSMUSG00000001123 | ENSMUST00000108269 | NON_SYNONYMOUS_CODING | 499         | 155 H/P         | chr11              | 78783286  | T  | G      | TOLERATED              | 0.26 | 3.32   | benign            | 0.431        |             |                   |                  |
| 155-p1-1 Adeno Carcinoma | Med1              | MGI      | ENSMUSG00000018160 | ENSMUST00000107545 | NON_SYNONYMOUS_CODING | 4253        | 1348 T/M        | chr11              | 98017240  | G  | A      | TOLERATED              | 0.52 | 3.59   | unknown           | -            |             |                   |                  |

**Supplementary Table 3. Predicted somatic mutations in tumors**

| Sample Id | Histological type | GeneName      | DB | Gene                | Transcript         | Consequence           | Amino_a         |                    |          |            |           | Ref | Var | Effect (SIFT) | Median       |             |                   | Score (Polyphen en) |
|-----------|-------------------|---------------|----|---------------------|--------------------|-----------------------|-----------------|--------------------|----------|------------|-----------|-----|-----|---------------|--------------|-------------|-------------------|---------------------|
|           |                   |               |    |                     |                    |                       | Position_n_cDNA | Position_n_protein | cid_chan | Chromosome | Position  |     |     |               | Score (SIFT) | Info (SIFT) | Effect (Polyphen) |                     |
| 155-p1-1  | Adeno Carcinoma   | Med24         | MG | ENSMUSG00000017210  | ENSMUST00000100500 | NON_SYNONYMOUS_CODING | 813             | 234                | A/V      | chr11      | 98577755  | G   | A   | TOLERATED     | 0.38         | 3.37        | benign            | 1.099               |
| 155-p1-1  | Adeno Carcinoma   | Megf10        | MG | ENSMUSG00000024593  | ENSMUST00000075770 | NON_SYNONYMOUS_CODING | 3420            | 921                | N/T      | chr18      | 57448970  | A   | C   | TOLERATED     | 0.24         | 3.36        | benign            | 1.455               |
| 155-p1-1  | Adeno Carcinoma   | Mgl2          | MG | ENSMUSG00000040950  | ENSMUST00000108584 | NON_SYNONYMOUS_CODING | 752             | 238                | R/Q      | chr11      | 69950242  | G   | A   | TOLERATED     | 0.41         | 2.75        | benign            | 1.269               |
| 155-p1-1  | Adeno Carcinoma   | Myh13         | MG | ENSMUSG000000060180 | ENSMUST00000108684 | STOP_GAINED           | 4851            | 1564               | R/*      | chr11      | 67177997  | C   | T   | -             | -            | -           | unknown           | -                   |
| 155-p1-1  | Adeno Carcinoma   | Nbr1          | MG | ENSMUSG00000017119  | ENSMUST00000103099 | NON_SYNONYMOUS_CODING | 1411            | 261                | R/Q      | chr11      | 101428492 | G   | A   | DELETERIOUS   | 0.04         | 3.55        | possibly damaging | 1.595               |
| 155-p1-1  | Adeno Carcinoma   | Necab3        | MG | ENSMUSG00000027489  | ENSMUST00000000895 | STOP_GAINED           | 136             | 37                 | R/*      | chr2       | 154382811 | G   | A   | -             | -            | -           | unknown           | -                   |
| 155-p1-1  | Adeno Carcinoma   | Nlrp1a        | MG | ENSMUSG000000069830 | ENSMUST00000108519 | NON_SYNONYMOUS_CODING | 3903            | 1202               | S/P      | chr11      | 70960307  | A   | G   | TOLERATED     | 1            | 4.32        | benign            | 0.517               |
| 155-p1-1  | Adeno Carcinoma   | Nos2          | MG | ENSMUSG00000020826  | ENSMUST00000018610 | NON_SYNONYMOUS_CODING | 989             | 245                | S/T      | chr11      | 78751092  | G   | C   | TOLERATED     | 1            | 2.78        | benign            | 0.633               |
| 155-p1-1  | Adeno Carcinoma   | Plk1          | MG | ENSMUSG00000030867  | ENSMUST00000033154 | NON_SYNONYMOUS_CODING | 1148            | 364                | R/W      | chr7       | 129311164 | C   | T   | DELETERIOUS   | 0.02         | 2.79        | benign            | 1.397               |
| 155-p1-1  | Adeno Carcinoma   | Rbbp5         | MG | ENSMUSG00000026439  | ENSMUST00000027700 | NON_SYNONYMOUS_CODING | 1401            | 420                | P/L      | chr1       | 134393468 | C   | T   | TOLERATED     | 0.08         | 3.1         | probably damaging | 2.106               |
| 155-p1-1  | Adeno Carcinoma   | Rpain         | MG | ENSMUSG00000018449  | ENSMUST00000018593 | NON_SYNONYMOUS_CODING | 905             | 204                | S/T      | chr11      | 70788523  | G   | C   | TOLERATED     | 0.17         | 2.97        | possibly damaging | 1.595               |
| 155-p1-1  | Adeno Carcinoma   | Sarm1         | MG | ENSMUSG000000050132 | ENSMUST00000108287 | NON_SYNONYMOUS_CODING | 1720            | 574                | L/F      | chr11      | 78297069  | G   | A   | DELETERIOUS   | 0            | 4.32        | benign            | 1.047               |
| 155-p1-1  | Adeno Carcinoma   | Setd2         | MG | ENSMUSG00000044791  | ENSMUST00000153838 | NON_SYNONYMOUS_CODING | 4114            | 1358               | N/K      | chr9       | 110453696 | C   | G   | DELETERIOUS   | 0            | 4.32        | possibly damaging | 1.611               |
| 155-p1-1  | Adeno Carcinoma   | Scga          | MG | ENSMUSG00000001508  | ENSMUST00000103162 | NON_SYNONYMOUS_CODING | 731             | 160                | A/S      | chr11      | 94832661  | C   | A   | TOLERATED     | 0.49         | 2.86        | benign            | 0.373               |
| 155-p1-1  | Adeno Carcinoma   | Tbcd123       | MG | ENSMUSG00000022749  | ENSMUST00000023431 | ESSENTIAL_SPLICE_SITE | 0               | 0                  | -        | chr16      | 57218535  | T   | A   | -             | -            | -           | -                 | -                   |
| 155-p1-1  | Adeno Carcinoma   | Thns1         | MG | ENSMUSG00000048550  | ENSMUST00000054591 | NON_SYNONYMOUS_CODING | 366             | 14                 | A/T      | chr2       | 21133103  | G   | A   | TOLERATED     | 1            | 4.32        | benign            | 0.724               |
| 155-p1-1  | Adeno Carcinoma   | Thns1         | MG | ENSMUSG00000048550  | ENSMUST00000054591 | NON_SYNONYMOUS_CODING | 1866            | 514                | V/M      | chr2       | 21134603  | G   | A   | DELETERIOUS   | 0            | 2.75        | benign            | 0.927               |
| 155-p1-1  | Adeno Carcinoma   | Tnfrsf13b     | MG | ENSMUSG00000010142  | ENSMUST00000010286 | NON_SYNONYMOUS_CODING | 599             | 175                | R/S      | chr11      | 60960519  | C   | A   | TOLERATED     | 0.66         | 4.32        | benign            | 1.093               |
| 155-p1-1  | Adeno Carcinoma   | Tpr           | MG | ENSMUSG00000006005  | ENSMUST00000064506 | NON_SYNONYMOUS_CODING | 5804            | 1831               | E/K      | chr1       | 152283895 | G   | A   | DELETERIOUS   | 0.04         | 3.49        | possibly damaging | 1.507               |
| 155-p1-1  | Adeno Carcinoma   | Tsk2          | MG | ENSMUSG00000045521  | ENSMUST00000055374 | NON_SYNONYMOUS_CODING | 832             | 251                | R/C      | chr16      | 17899578  | C   | T   | DELETERIOUS   | 0            | 2.82        | benign            | 0.891               |
| 155-p1-1  | Adeno Carcinoma   | Ugt1a10       | MG | ENSMUSG000000090165 | ENSMUST00000113142 | ESSENTIAL_SPLICE_SITE | 0               | 0                  | -        | chr1       | 90114701  | G   | C   | -             | -            | -           | -                 | -                   |
| 155-p1-1  | Adeno Carcinoma   | Unc13c        | MG | ENSMUSG00000062151  | ENSMUST00000075245 | NON_SYNONYMOUS_CODING | 4168            | 1390               | W/R      | chr9       | 73541100  | A   | G   | DELETERIOUS   | 0            | 3.7         | probably damaging | 4.029               |
| 155-p1-1  | Adeno Carcinoma   | Usp43         | MG | ENSMUSG00000020905  | ENSMUST00000021288 | NON_SYNONYMOUS_CODING | 3110            | 1002               | D/G      | chr11      | 67669377  | T   | C   | TOLERATED     | 0.26         | 4.32        | benign            | 0.748               |
| 155-p1-1  | Adeno Carcinoma   | Usp43         | MG | ENSMUSG00000020905  | ENSMUST00000021288 | NON_SYNONYMOUS_CODING | 2383            | 760                | M/V      | chr11      | 67688822  | T   | C   | TOLERATED     | 0.21         | 3.32        | benign            | 0.696               |
| 155-p1-1  | Adeno Carcinoma   | Zfc3h1        | MG | ENSMUSG000000036403 | ENSMUST00000036044 | NON_SYNONYMOUS_CODING | 5928            | 1897               | A/S      | chr10      | 114867761 | G   | T   | DELETERIOUS   | 0            | 4.32        | benign            | 1.002               |
| 155-p1-1  | Adeno Carcinoma   | Zfp106        | MG | ENSMUSG00000027288  | ENSMUST00000055241 | NON_SYNONYMOUS_CODING | 2478            | 776                | N/D      | chr2       | 120359404 | T   | C   | DELETERIOUS   | 0            | 3.5         | possibly damaging | 1.699               |
| 155-p1-1  | Adeno Carcinoma   | Zp2           | MG | ENSMUSG00000030911  | ENSMUST00000033207 | NON_SYNONYMOUS_CODING | 1676            | 549                | A/V      | chr7       | 127278693 | G   | A   | TOLERATED     | 0.61         | 2.79        | benign            | 1.097               |
| 155-p1-2  | Adeno Carcinoma   | 14-Sep        | MG | ENSMUSG00000032300  | ENSMUST00000034846 | NON_SYNONYMOUS_CODING | 2050            | 618                | E/K      | chr9       | 57105045  | C   | T   | TOLERATED     | 0.4          | 3.73        | benign            | 1.372               |
| 155-p1-2  | Adeno Carcinoma   | 1700017B05Rik | MG | ENSMUSG00000032300  | ENSMUST00000034846 | NON_SYNONYMOUS_CODING | 2050            | 618                | E/K      | chr9       | 57105045  | C   | T   | TOLERATED     | 0.4          | 3.73        | benign            | 1.372               |
| 155-p1-2  | Adeno Carcinoma   | 1700023E05Rik | MG | ENSMUSG00000029248  | ENSMUST00000031161 | NON_SYNONYMOUS_CODING | 1494            | 455                | E/D      | chr5       | 77490322  | A   | C   | TOLERATED     | 0.17         | 3.75        | benign            | 0.675               |
| 155-p1-2  | Adeno Carcinoma   | 1700086D15Rik | MG | ENSMUSG00000020548  | ENSMUST00000108696 | NON_SYNONYMOUS_CODING | 388             | 113                | K/R      | chr11      | 64966116  | T   | C   | -             | -            | -           | benign            | 0.675               |
| 155-p1-2  | Adeno Carcinoma   | 2210408I21Rik | MG | ENSMUSG00000071252  | ENSMUST00000095888 | NON_SYNONYMOUS_CODING | 2060            | 676                | R/Q      | chr13      | 77407707  | G   | A   | TOLERATED     | 0.36         | 4.32        | benign            | 0.107               |
| 155-p1-2  | Adeno Carcinoma   | Abea16        | MG | ENSMUSG00000051900  | ENSMUST00000120490 | NON_SYNONYMOUS_CODING | 870             | 279                | R/W      | chr7       | 12757108  | C   | T   | DELETERIOUS   | 0            | 2.81        | probably damaging | 2.348               |
| 155-p1-2  | Adeno Carcinoma   | Al848100      | MG | ENSMUSG00000040297  | ENSMUST00000048377 | NON_SYNONYMOUS_CODING | 177             | 59                 | C/W      | chr1       | 163806552 | G   | C   | DELETERIOUS   | 0.03         | 4.32        | probably damaging | 2.471               |
| 155-p1-2  | Adeno Carcinoma   | Aldh3a1       | MG | ENSMUSG00000019102  | ENSMUST00000108716 | NON_SYNONYMOUS_CODING | 627             | 154                | I/N      | chr11      | 61027753  | A   | A   | DELETERIOUS   | 0            | 2.79        | probably damaging | 2.827               |
| 155-p1-2  | Adeno Carcinoma   | Aldh3a1       | MG | ENSMUSG00000019102  | ENSMUST00000108716 | NON_SYNONYMOUS_CODING | 1080            | 305                | H/R      | chr11      | 61029887  | A   | G   | TOLERATED     | 0.29         | 2.79        | probably damaging | 1.938               |
| 155-p1-2  | Adeno Carcinoma   | Alox15        | MG | ENSMUSG00000018924  | ENSMUST00000019068 | NON_SYNONYMOUS_CODING | 1730            | 568                | K/N      | chr11      | 70158430  | T   | G   | TOLERATED     | 1            | 2.77        | benign            | 0.847               |
| 155-p1-2  | Adeno Carcinoma   | Alox15        | MG | ENSMUSG00000018924  | ENSMUST00000019068 | NON_SYNONYMOUS_CODING | 1729            | 568                | K/T      | chr11      | 70158431  | T   | G   | TOLERATED     | 1            | 2.77        | benign            | 0.847               |
| 155-p1-2  | Adeno Carcinoma   | Ankib1        | MG | ENSMUSG00000040351  | ENSMUST00000043551 | NON_SYNONYMOUS_CODING | 1659            | 418                | N/S      | chr5       | 3727642   | C   | C   | TOLERATED     | 0.56         | 3.39        | benign            | 0.054               |
| 155-p1-2  | Adeno Carcinoma   | Brdw1         | MG | ENSMUSG00000022914  | ENSMUST00000153398 | NON_SYNONYMOUS_CODING | 3006            | 954                | R/Q      | chr16      | 96255409  | C   | T   | DELETERIOUS   | 0            | 3.5         | possibly damaging | 1.892               |
| 155-p1-2  | Adeno Carcinoma   | C2cd2         | MG | ENSMUSG00000045975  | ENSMUST00000060801 | NON_SYNONYMOUS_CODING | 521             | 73                 | A/G      | chr16      | 98143708  | G   | C   | TOLERATED     | 0.29         | 3.05        | benign            | 1.262               |
| 155-p1-2  | Adeno Carcinoma   | Ccdc36        | MG | ENSMUSG00000047220  | ENSMUST00000076592 | NON_SYNONYMOUS_CODING | 1124            | 375                | H/Y      | chr9       | 108307708 | G   | A   | DELETERIOUS   | 0            | 4.32        | probably damaging | 2.056               |
| 155-p1-2  | Adeno Carcinoma   | Chpf          | MG | ENSMUSG00000032997  | ENSMUST00000079205 | NON_SYNONYMOUS_CODING | 582             | 139                | R/Q      | chr1       | 75474292  | C   | T   | DELETERIOUS   | 0.05         | 2.88        | possibly damaging | 1.737               |
| 155-p1-2  | Adeno Carcinoma   | Cmah          | MG | ENSMUSG00000016756  | ENSMUST00000050859 | NON_SYNONYMOUS_CODING | 1197            | 220                | V/I      | chr13      | 24527021  | G   | A   | DELETERIOUS   | 0.03         | 3.46        | benign            | 1.204               |
| 155-p1-2  | Adeno Carcinoma   | Fam83g        | MG | ENSMUSG00000042377  | ENSMUST00000093019 | NON_SYNONYMOUS_CODING | 1746            | 544                | P/L      | chr11      | 61516774  | C   | T   | DELETERIOUS   | 0            | 4.32        | probably damaging | 2.494               |
| 155-p1-2  | Adeno Carcinoma   | Gm10862       | MG | ENSMUSG00000075554  | ENSMUST00000100454 | NON_SYNONYMOUS_CODING | 215             | 72                 | R/L      | chr2       | 4013026   | T   | -   | -             | -            | -           | -                 | -                   |
| 155-p1-2  | Adeno Carcinoma   | Heatr6        | MG | ENSMUSG00000000976  | ENSMUST00000001002 | NON_SYNONYMOUS_CODING | 928             | 301                | P/T      | chr11      | 83578487  | C   | A   | TOLERATED     | 0.13         | 3.37        | probably damaging | 2.061               |
| 155-p1-2  | Adeno Carcinoma   | Hip1          | MG | ENSMUSG00000039959  | ENSMUST00000060311 | NON_SYNONYMOUS_CODING | 872             | 284                | R/L      | chr5       | 135916147 | C   | A   | DELETERIOUS   | 0.04         | 2.85        | probably damaging | 2.178               |
| 155-p1-2  | Adeno Carcinoma   | Hsd12         | MG | ENSMUSG00000028383  | ENSMUST00000030078 | NON_SYNONYMOUS_CODING | 1193            | 333                | E/Q      | chr4       | 59623513  | G   | C   | TOLERATED     | 0.17         | 4.32        | unknown           | -                   |
| 155-p1-2  | Adeno Carcinoma   | Htr2a         | MG | ENSMUSG00000034997  | ENSMUST00000036653 | NON_SYNONYMOUS_CODING | 1541            | 150                | V/I      | chr14      | 75044830  | G   | A   | TOLERATED     | 0.82         | 2.75        | benign            | 0.144               |
| 155-p1-2  | Adeno Carcinoma   | Ifrd2         | MG | ENSMUSG00000010048  | ENSMUST00000010192 | NON_SYNONYMOUS_CODING | 1099            | 310                | R/C      | chr9       | 107493944 | C   | T   | DELETERIOUS   | 0            | 2.78        | probably damaging | 2.311               |
| 155-p1-2  | Adeno Carcinoma   | Illrn         | MG | ENSMUSG00000026981  | ENSMUST00000028358 | NON_SYNONYMOUS_CODING | 121             | 31                 | P/S      | chr2       | 21492500  | C   | T   | -             | -            | -           | -                 | -                   |
| 155-p1-2  | Adeno Carcinoma   | Ith5          | MG | ENSMUSG00000025780  | ENSMUST00000026886 | NON_SYNONYMOUS_CODING | 467             | 124                | D/E      | chr2       | 10108654  | T   | A   | TOLERATED     | 1            | 2.81        | benign            | 1.342               |
| 155-p1-2  | Adeno Carcinoma   | Ith5          | MG | ENSMUSG00000025780  | ENSMUST00000026886 | NON_SYNONYMOUS_CODING | 1278            | 395                | D/N      | chr2       | 10160263  | G   | A   | TOLERATED     | 0.13         | 2.78        | benign            | 1.231               |
| 155-p1-2  | Adeno Carcinoma   | Klh5          | MG | ENSMUSG00000054920  | ENSMUST00000101191 | NON_SYNONYMOUS_CODING | 1238            | 358                | L/F      | chr5       | 65540002  | C   | T   | DELETERIOUS   | 0            | 2.76        | probably damaging | 2.05                |
| 155-p1-2  | Adeno Carcinoma   | Krt10         | MG | ENSMUSG00000019761  | ENSMUST00000103131 | NON_SYNONYMOUS_CODING | 43              | 4                  | L/R      | chr11      | 99250636  | A   | C   | DELETERIOUS   | 0            | 4.32        | unknown           | -                   |
| 155-p1-2  | Adeno Carcinoma   | L3mbtl        | MG | ENSMUSG00000035576  | ENSMUST00000035751 | NON_SYNONYMOUS_CODING | 1342            | 367                | A/T      | chr2       | 162786773 | G   | A   | TOLERATED     | 0.27         | 2.78        | benign            | 1.177               |
| 155-p1-2  | Adeno Carcinoma   | Lgals9        | MG | ENSMUSG00000001123  | ENSMUST00000108269 | NON_SYNONYMOUS_CODING | 576             | 181                | N/D      | chr11      | 78781529  | T   | C   | TOLERATED     | 0.2          | 3           | benign            | 0.874               |
| 155-p1-2  | Adeno Carcinoma   | Lgals9        | MG | ENSMUSG00000001123  | ENSMUST00000108269 | NON_SYNONYMOUS_CODING | 499             | 155                | H/P      | chr11      | 78783286  | T   | G   | TOLERATED     | 0.26         | 3.32        | benign            | 0.431               |
| 155-p1-2  | Adeno Carcinoma   | Med1          | MG | ENSMUSG00000018160  | ENSMUST00000107545 | NON_SYNONYMOUS_CODING | 4253            | 1348               | T/M      | chr11      | 98017240  | G   | A   | TOLERATED     | 0.52         | 3.59        | unknown           | -                   |

**Supplementary Table 3. Predicted somatic mutations in tumors**

| Sample Id                | Histological type | GeneName      | DB  | Gene                | Transcript          | Consequence           | Amino_a         |                    |          |            |           |     |     | Median        |              |             | Score (Polyphen en) |                   |
|--------------------------|-------------------|---------------|-----|---------------------|---------------------|-----------------------|-----------------|--------------------|----------|------------|-----------|-----|-----|---------------|--------------|-------------|---------------------|-------------------|
|                          |                   |               |     |                     |                     |                       | Position_n_cDNA | Position_n_protein | cid_chan | Chromosome | Position  | Ref | Var | Effect (SIFT) | Score (SIFT) | Info (SIFT) |                     | Effect (Polyphen) |
| 155-p1-2 Adeno Carcinoma |                   | Med24         | MGI | ENSMUSG00000017210  | ENSMUST000000100500 | NON_SYNONYMOUS_CODING | 813             | 234                | A/V      | chr11      | 98577755  | G   | A   | TOLERATED     | 0.38         | 3.77        | benign              | 1.099             |
| 155-p1-2 Adeno Carcinoma |                   | Mgl2          | MGI | ENSMUSG00000040950  | ENSMUST000000108584 | NON_SYNONYMOUS_CODING | 752             | 238                | R/Q      | chr11      | 69950242  | G   | A   | TOLERATED     | 0.41         | 2.35        | benign              | 1.269             |
| 155-p1-2 Adeno Carcinoma |                   | Mrp124        | MGI | ENSMUSG000000019710 | ENSMUST000000019854 | NON_SYNONYMOUS_CODING | 506             | 86                 | V/A      | chr3       | 87726126  | T   | C   | DELETERIOUS   | 0.01         | 2.77        | possibly damaging   | 1.952             |
| 155-p1-2 Adeno Carcinoma |                   | Myh13         | MGI | ENSMUSG000000060180 | ENSMUST000000108684 | STOP_GAINED           | 4851            | 1564               | R/*      | chr11      | 61777997  | C   | T   | -             | -            | -           | unknown             | -                 |
| 155-p1-2 Adeno Carcinoma |                   | Nfkib2        | MGI | ENSMUSG000000035356 | ENSMUST000000036273 | NON_SYNONYMOUS_CODING | 1271            | 233                | T/I      | chr16      | 55818511  | G   | A   | DELETERIOUS   | 0            | 4.32        | possibly damaging   | 1.912             |
| 155-p1-2 Adeno Carcinoma |                   | Nos2          | MGI | ENSMUSG000000020826 | ENSMUST000000018610 | NON_SYNONYMOUS_CODING | 989             | 245                | S/T      | chr11      | 78751092  | G   | C   | TOLERATED     | 1            | 2.78        | benign              | 0.633             |
| 155-p1-2 Adeno Carcinoma |                   | Ocm           | MGI | ENSMUSG000000029618 | ENSMUST000000085704 | NON_SYNONYMOUS_CODING | 250             | 41                 | A/P      | chr5       | 144785370 | C   | G   | TOLERATED     | 0.16         | 3.35        | benign              | 0.436             |
| 155-p1-2 Adeno Carcinoma |                   | Pfkfb4        | MGI | ENSMUSG000000025648 | ENSMUST000000051873 | NON_SYNONYMOUS_CODING | 122             | 24                 | P/A      | chr9       | 108894130 | C   | G   | TOLERATED     | 0.14         | 3.54        | probably damaging   | 2.023             |
| 155-p1-2 Adeno Carcinoma |                   | Plk1          | MGI | ENSMUSG000000030867 | ENSMUST000000033154 | NON_SYNONYMOUS_CODING | 1148            | 364                | R/W      | chr7       | 129311164 | C   | T   | DELETERIOUS   | 0.02         | 2.79        | benign              | 1.397             |
| 155-p1-2 Adeno Carcinoma |                   | Rpain         | MGI | ENSMUSG000000018449 | ENSMUST000000018593 | NON_SYNONYMOUS_CODING | 905             | 204                | S/T      | chr11      | 70788523  | G   | C   | TOLERATED     | 0.17         | 2.97        | possibly damaging   | 1.595             |
| 155-p1-2 Adeno Carcinoma |                   | Sarm1         | MGI | ENSMUSG000000050132 | ENSMUST000000108287 | NON_SYNONYMOUS_CODING | 1720            | 574                | L/F      | chr11      | 78297069  | G   | A   | DELETERIOUS   | 0            | 4.32        | benign              | 1.047             |
| 155-p1-2 Adeno Carcinoma |                   | Setd2         | MGI | ENSMUSG000000044791 | ENSMUST000000153838 | NON_SYNONYMOUS_CODING | 4114            | 1358               | N/K      | chr9       | 110453696 | C   | G   | DELETERIOUS   | 0            | 4.32        | possibly damaging   | 1.611             |
| 155-p1-2 Adeno Carcinoma |                   | Sgca          | MGI | ENSMUSG00000001508  | ENSMUST000000103162 | NON_SYNONYMOUS_CODING | 731             | 160                | A/S      | chr11      | 94832661  | C   | A   | TOLERATED     | 0.49         | 2.86        | benign              | 0.373             |
| 155-p1-2 Adeno Carcinoma |                   | Smg1          | MGI | ENSMUSG000000030655 | ENSMUST000000032891 | NON_SYNONYMOUS_CODING | 1839            | 498                | V/I      | chr7       | 125339345 | C   | T   | DELETERIOUS   | 0            | 3.53        | benign              | 0.225             |
| 155-p1-2 Adeno Carcinoma |                   | Spna1         | MGI | ENSMUSG000000026532 | ENSMUST000000027817 | NON_SYNONYMOUS_CODING | 7184            | 2340               | I/S      | chr1       | 176176646 | T   | G   | DELETERIOUS   | 0            | 3.17        | probably damaging   | 2.434             |
| 155-p1-2 Adeno Carcinoma |                   | Srsbia3       | MGI | ENSMUSG000000056812 | ENSMUST000000025477 | NON_SYNONYMOUS_CODING | 1183            | 132                | S/P      | chr18      | 64429171  | T   | C   | DELETERIOUS   | 0.01         | 2.75        | possibly damaging   | 1.632             |
| 155-p1-2 Adeno Carcinoma |                   | Thns1         | MGI | ENSMUSG000000048550 | ENSMUST000000054591 | NON_SYNONYMOUS_CODING | 366             | 14                 | A/T      | chr2       | 21133103  | G   | A   | TOLERATED     | 1            | 4.32        | benign              | 0.724             |
| 155-p1-2 Adeno Carcinoma |                   | Thns1L        | MGI | ENSMUSG000000048550 | ENSMUST000000054591 | NON_SYNONYMOUS_CODING | 1866            | 514                | V/M      | chr2       | 21134603  | A   | A   | DELETERIOUS   | 0            | 2.75        | benign              | 0.927             |
| 155-p1-2 Adeno Carcinoma |                   | Tnfrsf13b     | MGI | ENSMUSG000000010142 | ENSMUST000000010286 | NON_SYNONYMOUS_CODING | 599             | 175                | R/S      | chr11      | 60960519  | C   | A   | TOLERATED     | 0.66         | 4.32        | benign              | 1.093             |
| 155-p1-2 Adeno Carcinoma |                   | Tpm2          | MGI | ENSMUSG000000028464 | ENSMUST000000034926 | NON_SYNONYMOUS_CODING | 907             | 266                | I/T      | chr4       | 43531717  | A   | G   | TOLERATED     | 1            | 4.32        | unknown             | -                 |
| 155-p1-2 Adeno Carcinoma |                   | Tpr           | MGI | ENSMUSG000000006005 | ENSMUST000000064506 | NON_SYNONYMOUS_CODING | 5804            | 1831               | E/K      | chr1       | 152283895 | G   | A   | DELETERIOUS   | 0.04         | 3.49        | possibly damaging   | 1.507             |
| 155-p1-2 Adeno Carcinoma |                   | Tsk2          | MGI | ENSMUSG000000045521 | ENSMUST000000055374 | NON_SYNONYMOUS_CODING | 832             | 251                | R/C      | chr16      | 17899578  | C   | T   | DELETERIOUS   | 0            | 2.82        | benign              | 0.891             |
| 155-p1-2 Adeno Carcinoma |                   | Ugt1a10       | MGI | ENSMUSG000000090165 | ENSMUST000000113142 | ESSENTIAL_SPLICE_SITE | 0               | 0                  | -        | chr1       | 90114701  | G   | C   | -             | -            | -           | -                   | -                 |
| 155-p1-2 Adeno Carcinoma |                   | Ugt1a7c       | MGI | ENSMUSG000000090124 | ENSMUST000000058237 | NON_SYNONYMOUS_CODING | 448             | 131                | D/N      | chr1       | 89992086  | G   | A   | TOLERATED     | 1            | 2.77        | benign              | 0.278             |
| 155-p1-2 Adeno Carcinoma |                   | Usp43         | MGI | ENSMUSG000000020905 | ENSMUST000000021288 | NON_SYNONYMOUS_CODING | 3110            | 1002               | D/G      | chr11      | 67669377  | T   | C   | TOLERATED     | 0.26         | 4.32        | benign              | 0.748             |
| 155-p1-2 Adeno Carcinoma |                   | Usp43         | MGI | ENSMUSG000000020905 | ENSMUST000000021288 | NON_SYNONYMOUS_CODING | 2383            | 760                | M/V      | chr11      | 67688822  | T   | C   | TOLERATED     | 0.21         | 3.32        | benign              | 0.696             |
| 155-p1-2 Adeno Carcinoma |                   | Zfc3h1        | MGI | ENSMUSG000000034163 | ENSMUST000000036044 | NON_SYNONYMOUS_CODING | 5928            | 1897               | A/S      | chr10      | 114867761 | G   | T   | DELETERIOUS   | 0            | 4.32        | benign              | 1.002             |
| 155-p1-2 Adeno Carcinoma |                   | Zp2           | MGI | ENSMUSG000000030911 | ENSMUST000000033207 | NON_SYNONYMOUS_CODING | 1676            | 549                | A/V      | chr7       | 127278693 | G   | A   | TOLERATED     | 0.61         | 2.79        | benign              | 1.097             |
| 145 Fibroadenoma         |                   | 4933415A04Rik | MGI | ENSMUSG000000045877 | ENSMUST000000056256 | NON_SYNONYMOUS_CODING | 377             | 39                 | C/Y      | chr11      | 43400918  | G   | A   | -             | -            | -           | unknown             | -                 |
| 145 Fibroadenoma         |                   | Arcn1         | MGI | ENSMUSG000000032096 | ENSMUST000000034607 | STOP_GAINED           | 341             | 56                 | V/*      | chr9       | 94568144  | A   | C   | -             | -            | -           | unknown             | -                 |
| 145 Fibroadenoma         |                   | Chd9          | MGI | ENSMUSG000000056608 | ENSMUST000000109614 | ESSENTIAL_SPLICE_SITE | 0               | 0                  | -        | chr8       | 49357763  | T   | G   | -             | -            | -           | -                   | -                 |
| 145 Fibroadenoma         |                   | Chrb2         | MGI | ENSMUSG000000027950 | ENSMUST000000029562 | NON_SYNONYMOUS_CODING | 1618            | 480                | P/H      | chr3       | 89561089  | G   | T   | DELETERIOUS   | 0            | 2.77        | probably damaging   | 2.643             |
| 145 Fibroadenoma         |                   | Eif2b1        | MGI | ENSMUSG000000029388 | ENSMUST000000031334 | NON_SYNONYMOUS_CODING | 563             | 149                | S/G      | chr5       | 12502464  | T   | C   | TOLERATED     | 0.18         | 2.78        | possibly damaging   | 1.716             |
| 145 Fibroadenoma         |                   | Fam184a       | MGI | ENSMUSG000000019856 | ENSMUST000000020003 | NON_SYNONYMOUS_CODING | 1574            | 515                | L/F      | chr10      | 53404159  | C   | A   | DELETERIOUS   | 0.05         | 2.98        | possibly damaging   | 1.575             |
| 145 Fibroadenoma         |                   | Lrrcc8        | MGI | ENSMUSG000000054720 | ENSMUST000000067924 | NON_SYNONYMOUS_CODING | 1342            | 342                | F/V      | chr5       | 106036403 | T   | G   | -             | -            | -           | possibly damaging   | 1.952             |
| 145 Fibroadenoma         |                   | Lypd6b        | MGI | ENSMUSG000000026765 | ENSMUST000000028103 | NON_SYNONYMOUS_CODING | 758             | 102                | T/P      | chr2       | 49801632  | A   | C   | TOLERATED     | 0.12         | 3.57        | possibly damaging   | 1.527             |
| 145 Fibroadenoma         |                   | Pcsk5         | MGI | ENSMUSG000000024713 | ENSMUST000000025618 | STOP_GAINED           | 1999            | 644                | E/*      | chr19      | 17650375  | C   | A   | -             | -            | -           | unknown             | -                 |
| 145 Fibroadenoma         |                   | Sgk1          | MGI | ENSMUSG000000019970 | ENSMUST000000120509 | NON_SYNONYMOUS_CODING | 2025            | 524                | L/I      | chr10      | 21718628  | C   | A   | DELETERIOUS   | 0.01         | 3.47        | benign              | 1.229             |
| 145 Fibroadenoma         |                   | Simn          | MGI | ENSMUSG000000020439 | ENSMUST000000110011 | NON_SYNONYMOUS_CODING | 2127            | 701                | S/T      | chr11      | 3424711   | C   | G   | TOLERATED     | 0.47         | 3.68        | benign              | 1.019             |
| 145 Fibroadenoma         |                   | Tns1          | MGI | ENSMUSG000000055322 | ENSMUST000000068832 | NON_SYNONYMOUS_CODING | 728             | 243                | A/V      | chr1       | 73972104  | G   | A   | TOLERATED     | 1            | 3.17        | benign              | 0.11              |
| 145 Fibroadenoma         |                   | Wdttc1        | MGI | ENSMUSG000000037622 | ENSMUST000000043305 | NON_SYNONYMOUS_CODING | 1189            | 254                | H/P      | chr4       | 132859578 | T   | G   | DELETERIOUS   | 0.01         | 2.79        | probably damaging   | 3.496             |
| 196 Fibroadenoma         |                   | 2700073G19Rik | MGI | ENSMUSG000000021041 | ENSMUST000000091090 | NON_SYNONYMOUS_CODING | 432             | 111                | D/E      | chr12      | 88784536  | G   | C   | Not Scored    | -            | -           | benign              | 0.9               |
| 196 Fibroadenoma         |                   | Cth           | MGI | ENSMUSG000000028179 | ENSMUST000000118539 | NON_SYNONYMOUS_CODING | 703             | 219                | V/G      | chr3       | 157571928 | A   | C   | DELETERIOUS   | 0            | 2.79        | probably damaging   | 1.759             |
| 196 Fibroadenoma         |                   | Gm10165       | MGI | ENSMUSG000000066507 | ENSMUST000000085433 | NON_SYNONYMOUS_CODING | 1176            | 69                 | T/A      | chr12      | 44912734  | T   | C   | -             | -            | -           | -                   | -                 |
| 196 Fibroadenoma         |                   | Gm10914       | MGI | ENSMUSG000000078102 | ENSMUST000000104901 | NON_SYNONYMOUS_CODING | 176             | 59                 | V/E      | chr16      | 4869230   | A   | T   | -             | -            | -           | -                   | -                 |
| 196 Fibroadenoma         |                   | Gm6306        | MGI | ENSMUSG000000060975 | ENSMUST000000079609 | NON_SYNONYMOUS_CODING | 248             | 83                 | E/G      | chr2       | 104552079 | A   | G   | -             | -            | -           | -                   | -                 |
| 196 Fibroadenoma         |                   | Klra10        | MGI | ENSMUSG000000072718 | ENSMUST000000112020 | NON_SYNONYMOUS_CODING | 209             | 68                 | I/N      | chr6       | 130229505 | A   | T   | DELETERIOUS   | 0            | 2.81        | probably damaging   | 2.779             |
| 196 Fibroadenoma         |                   | Klr1b         | MGI | ENSMUSG000000079298 | ENSMUST000000032472 | NON_SYNONYMOUS_CODING | 607             | 183                | V/D      | chr6       | 128765319 | A   | T   | TOLERATED     | 0.95         | 2.78        | benign              | 0.667             |
| 196 Fibroadenoma         |                   | Krtap4-9      | MGI | ENSMUSG000000078262 | ENSMUST000000105059 | NON_SYNONYMOUS_CODING | 161             | 36                 | R/S      | chr11      | 99646674  | C   | A   | TOLERATED     | 0.56         | 2.82        | unknown             | -                 |
| 196 Fibroadenoma         |                   | Net1          | MGI | ENSMUSG000000021215 | ENSMUST000000091853 | NON_SYNONYMOUS_CODING | 1644            | 497                | R/C      | chr13      | 3883615   | G   | A   | DELETERIOUS   | 0.01         | 2.79        | probably damaging   | 2.679             |
| 196 Fibroadenoma         |                   | Pax6          | MGI | ENSMUSG000000027168 | ENSMUST000000111087 | NON_SYNONYMOUS_CODING | 668             | 128                | N/S      | chr2       | 105525243 | A   | G   | TOLERATED     | 0.43         | 2.97        | benign              | 0.89              |
| 196 Fibroadenoma         |                   | Pcif1         | MGI | ENSMUSG000000039849 | ENSMUST000000041643 | NON_SYNONYMOUS_CODING | 565             | 84                 | S/L      | chr2       | 164710860 | C   | T   | DELETERIOUS   | 0.01         | 3.39        | possibly damaging   | 1.745             |
| 196 Fibroadenoma         |                   | Pdlim5        | MGI | ENSMUSG000000028273 | ENSMUST000000029941 | NON_SYNONYMOUS_CODING | 1177            | 362                | W/L      | chr3       | 141940801 | C   | A   | TOLERATED     | 0.66         | 2.84        | probably damaging   | 2.896             |
| 196 Fibroadenoma         |                   | Pla2g4e       | MGI | ENSMUSG000000050211 | ENSMUST000000090071 | NON_SYNONYMOUS_CODING | 627             | 67                 | S/P      | chr2       | 120070445 | A   | G   | Not Scored    | -            | -           | benign              | 0.225             |
| 219 Fibroadenoma         |                   | Foxp2         | MGI | ENSMUSG000000029563 | ENSMUST000000115474 | NON_SYNONYMOUS_CODING | 2254            | 644                | S/R      | chr6       | 15365890  | C   | A   | DELETERIOUS   | 0.02         | 3.27        | possibly damaging   | 1.57              |
| 219 Fibroadenoma         |                   | G6pc2         | MGI | ENSMUSG00000005232  | ENSMUST00000005364  | NON_SYNONYMOUS_CODING | 696             | 212                | V/I      | chr2       | 69064702  | G   | A   | TOLERATED     | 0.21         | 2.88        | benign              | 0.331             |
| 219 Fibroadenoma         |                   | Olfra419      | MGI | ENSMUSG000000050788 | ENSMUST000000061990 | NON_SYNONYMOUS_CODING | 691             | 231                | A/T      | chr1       | 176180366 | C   | T   | TOLERATED     | 0.13         | 2.72        | benign              | 0.253             |
| 219 Fibroadenoma         |                   | Piwi1         | MGI | ENSMUSG000000029423 | ENSMUST000000086056 | NON_SYNONYMOUS_CODING | 1028            | 280                | V/F      | chr5       | 129249755 | G   | T   | DELETERIOUS   | 0.01         | 2.82        | probably damaging   | 2.235             |
| 219 Fibroadenoma         |                   | Plekhh2       | MGI | ENSMUSG000000040852 | ENSMUST000000047206 | NON_SYNONYMOUS_CODING | 921             | 282                | S/C      | chr17      | 84965472  | T   | C   | DELETERIOUS   | 0            | 3.55        | benign              | 1.488             |
| 317 Fibroadenoma         |                   | Map3k15       | MGI | ENSMUSG000000031303 | ENSMUST000000033665 | NON_SYNONYMOUS_CODING | 313             | 105                | V/I      | chrX       | 156426677 | G   | A   | TOLERATED     | 0.47         | 2.9         | benign              | 0.045             |

**Supplementary Table 3. Predicted somatic mutations in tumors**

| Sample Id | Histological type | GeneName      | DB  | Gene                | Transcript          | Consequence           | Amino_a         |                    |          |       |           | Median   |     |                        | Score (Polyphen en) |               |                   |             |
|-----------|-------------------|---------------|-----|---------------------|---------------------|-----------------------|-----------------|--------------------|----------|-------|-----------|----------|-----|------------------------|---------------------|---------------|-------------------|-------------|
|           |                   |               |     |                     |                     |                       | Position_n_cDNA | Position_n_protein | cid_chan | me    | Chromoso  | Position | Ref | Var                    |                     | Effect (SIFT) | Score (SIFT)      | Info (SIFT) |
| 317       | Fibroadenoma      | Rai14         | MGI | ENSMUSG0000002246   | ENSMUST00000090339  | NON_SYNONYMOUS_CODING | 1629            | 463                | Q/P      | chr15 | 10505325  | T        | G   | DELETERIOUS            | 0.01                | 3.05          | possibly damaging | 1.593       |
| 326       | Fibroadenoma      | Olf572        | MGI | ENSMUSG00000073963  | ENSMUST00000098214  | NON_SYNONYMOUS_CODING | 93              | 31                 | F/L      | chr7  | 110076236 | C        | A   | TOLERATED              | 0.28                | 2.78          | benign            | 0.334       |
| 326       | Fibroadenoma      | Rnf112        | MGI | ENSMUSG00000010086  | ENSMUST00000060255  | NON_SYNONYMOUS_CODING | 835             | 227                | P/A      | chr11 | 61265622  | G        | C   | TOLERATED              | 1                   | 3.08          | probably damaging | 2.117       |
| 326       | Fibroadenoma      | Rps27l        | MGI | ENSMUSG000000036781 | ENSMUST000000127896 | NON_SYNONYMOUS_CODING | 158             | 25                 | V/G      | chr9  | 66794705  | T        | G   | DELETERIOUS            | 0                   | 3.33          | possibly damaging | 1.588       |
| 326       | Fibroadenoma      | Ybx1          | MGI | ENSMUSG00000028639  | ENSMUST00000079644  | NON_SYNONYMOUS_CODING | 1151            | 304                | A/T      | chr4  | 118951629 | C        | T   | TOLERATED              | 0.18                | 3.11          | possibly damaging | 1.56        |
| 612       | Fibroadenoma      | A23006K03Rik  | MGI | ENSMUSG00000078690  | ENSMUST00000107533  | NON_SYNONYMOUS_CODING | 494             | 101                | Q/R      | chr7  | 68347607  | T        | C   | DELETERIOUS            | 0.02                | 2.8           | unknown           | -           |
| 612       | Fibroadenoma      | Bai1          | MGI | ENSMUSG00000034730  | ENSMUST00000042035  | NON_SYNONYMOUS_CODING | 2016            | 536                | V/I      | chr15 | 74372004  | G        | A   | TOLERATED              | 0.12                | 2.92          | benign            | 0.875       |
| 612       | Fibroadenoma      | Mllt3         | MGI | ENSMUSG00000028496  | ENSMUST00000078090  | NON_SYNONYMOUS_CODING | 1210            | 314                | A/E      | chr4  | 87486773  | G        | T   | DELETERIOUS            | 0.01                | 3.35          | benign            | 1.218       |
| 612       | Fibroadenoma      | Ptpre         | MGI | ENSMUSG00000041836  | ENSMUST00000073961  | NON_SYNONYMOUS_CODING | 2111            | 596                | E/D      | chr7  | 142870841 | G        | C   | TOLERATED              | 0.11                | 2.8           | benign            | 0.349       |
| 612       | Fibroadenoma      | Scd2          | MGI | ENSMUSG00000025203  | ENSMUST00000026221  | NON_SYNONYMOUS_CODING | 1393            | 227                | V/I      | chr19 | 44375736  | G        | A   | TOLERATED              | 1                   | 2.79          | benign            | 0.193       |
| 612       | Fibroadenoma      | Sic4a10       | MGI | ENSMUSG00000026904  | ENSMUST00000112480  | NON_SYNONYMOUS_CODING | 136             | 46                 | R/W      | chr2  | 62028802  | C        | T   | DELETERIOUS            | 0.01                | 3.1           | probably damaging | 2.637       |
| 612       | Fibroadenoma      | Ston2         | MGI | ENSMUSG00000020961  | ENSMUST00000052969  | NON_SYNONYMOUS_CODING | 1226            | 244                | P/L      | chr12 | 92887342  | G        | A   | DELETERIOUS            | 0                   | 3.58          | probably damaging | 2.316       |
| 113       | Spindle Cell      | Trp53         | MGI | ENSMUSG00000059552  | ENSMUST00000108658  | NON_SYNONYMOUS_CODING | 561             | 135                | A/V      | chr11 | 69402152  | A        | T   | DELETERIOUS            | 0.92                | 3.38          | benign            | 0.268       |
| 323       | Spindle Cell      | 5730419I09Rik | MGI | ENSMUSG00000030279  | ENSMUST00000111758  | NON_SYNONYMOUS_CODING | 2063            | 632                | T/S      | chr6  | 142984762 | G        | C   | TOLERATED              | -                   | -             | unknown           | -           |
| 323       | Spindle Cell      | A730018C14Rik | MGI | ENSMUSG00000047828  | ENSMUST00000050754  | NON_SYNONYMOUS_CODING | 593             | 42                 | S/P      | chr12 | 113653786 | A        | G   | No sufficient homology | -                   | -             | unknown           | -           |
| 323       | Spindle Cell      | B3gal1        | MGI | ENSMUSG00000034780  | ENSMUST000000042456 | STOP_GAINED           | 1100            | 273                | R/*      | chr2  | 67956816  | C        | T   | Stop codon not handled | -                   | -             | unknown           | -           |
| 323       | Spindle Cell      | BC022687      | MGI | ENSMUSG000000037594 | ENSMUST00000037014  | NON_SYNONYMOUS_CODING | 844             | 144                | S/C      | chr12 | 114049094 | A        | T   | TOLERATED              | 0.16                | 4.32          | benign            | 0.446       |
| 323       | Spindle Cell      | Bcat1         | MGI | ENSMUSG00000030268  | ENSMUST00000087468  | NON_SYNONYMOUS_CODING | 762             | 240                | L/P      | chr6  | 144967868 | A        | G   | DELETERIOUS            | 0                   | 2.8           | probably damaging | 2.618       |
| 323       | Spindle Cell      | Cacng8        | MGI | ENSMUSG00000053395  | ENSMUST00000092351  | NON_SYNONYMOUS_CODING | 568             | 154                | R/G      | chr7  | 34125304  | A        | G   | DELETERIOUS            | 0.02                | 2.97          | probably damaging | 2.087       |
| 323       | Spindle Cell      | Cdca4         | MGI | ENSMUSG00000047832  | ENSMUST00000062092  | NON_SYNONYMOUS_CODING | 1134            | 196                | S/T      | chr12 | 114059731 | C        | G   | TOLERATED              | 0.94                | 2.93          | benign            | 0.575       |
| 323       | Spindle Cell      | Chd4          | MGI | ENSMUSG00000063870  | ENSMUST00000112390  | NON_SYNONYMOUS_CODING | 4976            | 1600               | P/T      | chr6  | 125072159 | C        | A   | DELETERIOUS            | 0.04                | 3.32          | possibly damaging | 1.8         |
| 323       | Spindle Cell      | Chd5          | MGI | ENSMUSG00000050545  | ENSMUST00000030775  | NON_SYNONYMOUS_CODING | 4194            | 1298               | R/L      | chr4  | 151751234 | G        | T   | TOLERATED              | 0.23                | 2.83          | probably damaging | 1.828       |
| 323       | Spindle Cell      | Ctnnap4       | MGI | ENSMUSG00000031772  | ENSMUST000000118171 | ESSENTIAL_SPICE_SITE  | 0               | 0                  | -        | chr8  | 115334642 | G        | C   | -                      | -                   | -             | -                 | -           |
| 323       | Spindle Cell      | Col27a1       | MGI | ENSMUSG00000045672  | ENSMUST00000036300  | NON_SYNONYMOUS_CODING | 3919            | 1176               | E/D      | chr4  | 62967737  | G        | C   | No sufficient homology | -                   | -             | unknown           | -           |
| 323       | Spindle Cell      | E330021D16Rik | MGI | ENSMUSG00000045291  | ENSMUST00000058713  | NON_SYNONYMOUS_CODING | 375             | 26                 | V/M      | chr6  | 136351777 | C        | T   | TOLERATED              | 0.37                | 3.35          | benign            | 0.669       |
| 323       | Spindle Cell      | Ears2         | MGI | ENSMUSG00000030871  | ENSMUST00000033159  | NON_SYNONYMOUS_CODING | 1670            | 484                | V/M      | chr7  | 129183264 | C        | T   | TOLERATED              | 0.31                | 2.76          | benign            | 0.202       |
| 323       | Spindle Cell      | Efr3b         | MGI | ENSMUSG00000020658  | ENSMUST00000111178  | NON_SYNONYMOUS_CODING | 1733            | 535                | C/S      | chr12 | 34127515  | A        | T   | TOLERATED              | 0.05                | 2.99          | possibly damaging | 1.896       |
| 323       | Spindle Cell      | Gle1          | MGI | ENSMUSG00000019715  | ENSMUST00000019859  | NON_SYNONYMOUS_CODING | 1801            | 576                | R/H      | chr2  | 29806199  | G        | A   | DELETERIOUS            | 0.03                | 2.81          | probably damaging | 2.238       |
| 323       | Spindle Cell      | Gm71          | MGI | ENSMUSG00000049882  | ENSMUST00000058639  | NON_SYNONYMOUS_CODING | 254             | 84                 | M/V      | chr12 | 70683724  | T        | C   | TOLERATED              | 1                   | 2.76          | benign            | 0.466       |
| 323       | Spindle Cell      | Gm766         | MGI | ENSMUSG00000048473  | ENSMUST00000111768  | NON_SYNONYMOUS_CODING | 8               | 3                  | C/S      | chr6  | 142752903 | C        | G   | DELETERIOUS            | 0                   | 4.32          | benign            | 0.426       |
| 323       | Spindle Cell      | Gm900         | MGI | ENSMUSG00000076611  | ENSMUST00000103413  | NON_SYNONYMOUS_CODING | 865             | 289                | D/V      | chr12 | 114509971 | T        | A   | DELETERIOUS            | 0.01                | 2.82          | benign            | 1.379       |
| 323       | Spindle Cell      | Gsg1          | MGI | ENSMUSG00000030206  | ENSMUST00000087729  | NON_SYNONYMOUS_CODING | 983             | 287                | S/N      | chr6  | 135187668 | C        | T   | TOLERATED              | 0.28                | 3.57          | benign            | 1.22        |
| 323       | Spindle Cell      | Ighg1         | MGI | ENSMUSG00000076614  | ENSMUST00000103419  | NON_SYNONYMOUS_CODING | 846             | 283                | V/I      | chr12 | 114567315 | C        | T   | TOLERATED              | 0.44                | 2.8           | benign            | 0.091       |
| 323       | Spindle Cell      | Klf26a        | MGI | ENSMUSG00000021294  | ENSMUST00000128402  | NON_SYNONYMOUS_CODING | 4128            | 1333               | T/N      | chr12 | 113415522 | C        | A   | TOLERATED              | 0.26                | 3.34          | benign            | 0.13        |
| 323       | Spindle Cell      | Klra12        | MGI | ENSMUSG00000079280  | ENSMUST00000049314  | NON_SYNONYMOUS_CODING | 757             | 28                 | I/F      | chr6  | 130216483 | T        | A   | TOLERATED              | 0.97                | 3.38          | unknown           | -           |
| 323       | Spindle Cell      | Klra3         | MGI | ENSMUSG00000067591  | ENSMUST00000111998  | NON_SYNONYMOUS_CODING | 159             | 13                 | L/F      | chr6  | 130285781 | G        | A   | TOLERATED              | 1                   | 2.84          | benign            | 0.953       |
| 323       | Spindle Cell      | Klrc3         | MGI | ENSMUSG00000033027  | ENSMUST00000053164  | NON_SYNONYMOUS_CODING | 773             | 245                | P/T      | chr6  | 12958911  | G        | T   | DELETERIOUS            | 0                   | 4.32          | probably damaging | 2.017       |
| 323       | Spindle Cell      | Mgat5b        | MGI | ENSMUSG00000043857  | ENSMUST00000103027  | NON_SYNONYMOUS_CODING | 2561            | 650                | L/V      | chr11 | 116846213 | C        | G   | TOLERATED              | 1                   | 4.32          | benign            | 0.087       |
| 323       | Spindle Cell      | Mid1          | MGI | ENSMUSG00000035299  | ENSMUST00000112104  | NON_SYNONYMOUS_CODING | 2109            | 627                | S/A      | chrX  | 166426979 | T        | G   | TOLERATED              | 0.22                | 2.83          | benign            | 0.167       |
| 323       | Spindle Cell      | Ocr1          | MGI | ENSMUSG00000001173  | ENSMUST00000001202  | NON_SYNONYMOUS_CODING | 1561            | 432                | S/T      | chrX  | 45291529  | G        | C   | TOLERATED              | 0.32                | 2.85          | benign            | 0.171       |
| 323       | Spindle Cell      | Palm2         | MGI | ENSMUSG00000090053  | ENSMUST00000102905  | NON_SYNONYMOUS_CODING | 474             | 55                 | V/I      | chr4  | 57660898  | G        | A   | TOLERATED              | 0.59                | 2.86          | benign            | 0.461       |
| 323       | Spindle Cell      | Pde3a         | MGI | ENSMUSG00000041741  | ENSMUST00000043259  | NON_SYNONYMOUS_CODING | 1159            | 387                | I/F      | chr6  | 141407730 | A        | T   | TOLERATED              | 0.07                | 3.03          | benign            | 1.394       |
| 323       | Spindle Cell      | Pick1         | MGI | ENSMUSG00000068206  | ENSMUST00000053926  | NON_SYNONYMOUS_CODING | 1600            | 461                | R/K      | chr15 | 79086314  | C        | A   | DELETERIOUS            | 0.01                | 4.32          | unknown           | -           |
| 323       | Spindle Cell      | Ppfp1b1       | MGI | ENSMUSG00000016487  | ENSMUST00000111623  | NON_SYNONYMOUS_CODING | 1326            | 371                | L/P      | chr6  | 146954499 | T        | C   | TOLERATED              | 0.3                 | 2.99          | benign            | 0.114       |
| 323       | Spindle Cell      | Prmp5         | MGI | ENSMUSG00000052262  | ENSMUST00000048686  | NON_SYNONYMOUS_CODING | 581             | 185                | Q/K      | chr6  | 132262325 | G        | T   | TOLERATED              | 0.36                | 2.86          | unknown           | -           |
| 323       | Spindle Cell      | Rusc2         | MGI | ENSMUSG00000035969  | ENSMUST00000035645  | NON_SYNONYMOUS_CODING | 2469            | 728                | P/R      | chr4  | 43434636  | C        | G   | TOLERATED              | 0.54                | 3.88          | benign            | 1.423       |
| 323       | Spindle Cell      | Slc15a5       | MGI | ENSMUSG00000044378  | ENSMUST00000050132  | NON_SYNONYMOUS_CODING | 1135            | 333                | G/S      | chr6  | 137960686 | C        | T   | TOLERATED              | 0.49                | 2.81          | benign            | 0.573       |
| 323       | Spindle Cell      | Sv2c          | MGI | ENSMUSG00000051111  | ENSMUST00000161263  | ESSENTIAL_SPICE_SITE  | 0               | 0                  | -        | chr13 | 96751791  | A        | C   | -                      | -                   | -             | -                 | -           |
| 323       | Spindle Cell      | Tdrd9         | MGI | ENSMUSG00000054003  | ENSMUST00000079009  | NON_SYNONYMOUS_CODING | 980             | 104                | Y/H      | chr12 | 113261479 | T        | C   | TOLERATED              | 0.54                | 2.78          | possibly damaging | 1.631       |
| 323       | Spindle Cell      | Tex19.2       | MGI | ENSMUSG00000039337  | ENSMUST00000039146  | NON_SYNONYMOUS_CODING | 1582            | 314                | D/E      | chr11 | 120977993 | A        | C   | Not Scored             | -                   | -             | benign            | 0.675       |
| 323       | Spindle Cell      | Timm9         | MGI | ENSMUSG00000021079  | ENSMUST00000021486  | NON_SYNONYMOUS_CODING | 412             | 89                 | R/W      | chr12 | 72224544  | G        | A   | DELETERIOUS            | 0                   | 4.32          | probably damaging | 2.257       |
| 323       | Spindle Cell      | Tmem67        | MGI | ENSMUSG00000049488  | ENSMUST00000108293  | NON_SYNONYMOUS_CODING | 669             | 26                 | Q/P      | chr4  | 12016499  | T        | G   | Not Scored             | -                   | -             | benign            | 1.35        |
| 323       | Spindle Cell      | Trmt61a       | MGI | ENSMUSG00000060950  | ENSMUST00000084947  | NON_SYNONYMOUS_CODING | 613             | 42                 | V/L      | chr12 | 112916966 | G        | C   | TOLERATED              | 0.45                | 2.78          | benign            | 1.43        |
| 323       | Spindle Cell      | Trp53         | MGI | ENSMUSG00000059552  | ENSMUST00000108658  | NON_SYNONYMOUS_CODING | 862             | 245                | R/H      | chr11 | 69402173  | G        | A   | DELETERIOUS            | 0                   | 2.76          | probably damaging | 2.45        |
| 323       | Spindle Cell      | Zbtb42        | MGI | ENSMUSG00000037638  | ENSMUST00000037962  | NON_SYNONYMOUS_CODING | 232             | 78                 | T/A      | chr12 | 113917878 | A        | G   | TOLERATED              | 1                   | 4.32          | unknown           | -           |
| 323       | Spindle Cell      | Zdhhc4        | MGI | ENSMUSG00000001844  | ENSMUST00000001900  | NON_SYNONYMOUS_CODING | 1178            | 300                | R/H      | chr5  | 144078354 | C        | T   | TOLERATED              | 0.98                | 2.88          | benign            | 0.864       |
| 323       | Spindle Cell      | Zfp217        | MGI | ENSMUSG00000052056  | ENSMUST00000109155  | NON_SYNONYMOUS_CODING | 1927            | 473                | P/H      | chr2  | 169941728 | T        | C   | TOLERATED              | 0.38                | 2.99          | benign            | 0.87        |
| 323-p1    | Spindle Cell      | 1700023A16Rik | MGI | ENSMUSG00000030292  | ENSMUST00000111634  | NON_SYNONYMOUS_CODING | 659             | 219                | T/N      | chr6  | 146810206 | C        | A   | TOLERATED              | 0.38                | 4.32          | benign            | 0.08        |
| 323-p1    | Spindle Cell      | 5330439B14Rik | MGI | ENSMUSG00000041614  | ENSMUST00000040390  | NON_SYNONYMOUS_CODING | 626             | 96                 | L/V      | chr6  | 142574216 | C        | G   | -                      | -                   | -             | unknown           | -           |
| 323-p1    | Spindle Cell      | Adcy5         | MGI | ENSMUSG00000022840  | ENSMUST00000023549  | NON_SYNONYMOUS_CODING | 3992            | 924                | V/M      | chr16 | 35291630  | G        | A   | DELETERIOUS            | 0                   | 2.77          | benign            | 0.399       |



**Supplementary Table 3. Predicted somatic mutations in tumors**

| Sample Id | Histological type | GeneName      | DB  | Gene               | Transcript         | Consequence           | Amino_a           |                      | Chromosome | Position  | Ref | Var | Effect (SIFT) | Median      |                        | Score (Polyphen) |
|-----------|-------------------|---------------|-----|--------------------|--------------------|-----------------------|-------------------|----------------------|------------|-----------|-----|-----|---------------|-------------|------------------------|------------------|
|           |                   |               |     |                    |                    |                       | Position_i n_cDNA | Position_j n_protein |            |           |     |     |               | Info (SIFT) | Effect (Polyphen)      |                  |
| 323-p1    | Spindle Cell      | Akap14        | MGI | ENSMUSG00000036551 | ENSMUST00000046557 | NON_SYNONYMOUS_CODING | 827               | 248 A/V              | chrX       | 34703333  | G   | A   | TOLERATED     | 0.12        | 3.14 unknown           | -                |
| 323-p1    | Spindle Cell      | Atf7ip        | MGI | ENSMUSG00000030213 | ENSMUST00000032335 | NON_SYNONYMOUS_CODING | 981               | 287 D/E              | chr6       | 136509152 | T   | A   | TOLERATED     | 1           | 2.91 benign            | 0.073            |
| 323-p1    | Spindle Cell      | Atf7ip        | MGI | ENSMUSG00000030213 | ENSMUST00000032335 | NON_SYNONYMOUS_CODING | 1760              | 547 A/V              | chr6       | 136509931 | C   | T   | TOLERATED     | 0.65        | 2.91 benign            | 0.572            |
| 323-p1    | Spindle Cell      | B3galt1       | MGI | ENSMUSG00000042456 | ENSMUST00000042456 | STOP_GAINED           | 1100              | 273 R/*              | chr2       | 67956816  | C   | T   | -             | -           | unknown                | -                |
| 323-p1    | Spindle Cell      | BC049715      | MGI | ENSMUSG00000047515 | ENSMUST00000052702 | NON_SYNONYMOUS_CODING | 675               | 110 A/T              | chr6       | 136788612 | G   | A   | DELETTERIOUS  | 0           | 3.67 benign            | 0.242            |
| 323-p1    | Spindle Cell      | BC049715      | MGI | ENSMUSG00000047515 | ENSMUST00000052702 | NON_SYNONYMOUS_CODING | 1008              | 221 E/K              | chr6       | 136788945 | G   | A   | TOLERATED     | 0.35        | 3.67 benign            | 0.309            |
| 323-p1    | Spindle Cell      | Bcat1         | MGI | ENSMUSG00000030268 | ENSMUST00000087468 | NON_SYNONYMOUS_CODING | 762               | 240 L/P              | chr6       | 144967868 | A   | G   | DELETTERIOUS  | 0           | 2.8 probably damaging  | 2.618            |
| 323-p1    | Spindle Cell      | Bcl2l14       | MGI | ENSMUSG00000030200 | ENSMUST00000032321 | NON_SYNONYMOUS_CODING | 1065              | 269 R/Q              | chr6       | 134382288 | G   | A   | TOLERATED     | 1           | 3.71 benign            | 0.614            |
| 323-p1    | Spindle Cell      | Chd4          | MGI | ENSMUSG00000063870 | ENSMUST00000112390 | NON_SYNONYMOUS_CODING | 4976              | 1600 P/T             | chr6       | 125072159 | C   | A   | DELETTERIOUS  | 0.04        | 3.32 possibly damaging | 1.8              |
| 323-p1    | Spindle Cell      | Chd5          | MGI | ENSMUSG00000005045 | ENSMUST00000030775 | NON_SYNONYMOUS_CODING | 4194              | 1298 R/L             | chr4       | 151751234 | G   | T   | TOLERATED     | 0.23        | 2.82 possibly damaging | 1.828            |
| 323-p1    | Spindle Cell      | Cntnap4       | MGI | ENSMUSG00000031772 | ENSMUST00000118171 | ESSENTIAL_SPLICE_SITE | 0                 | 0 -                  | chr8       | 115334642 | G   | C   | -             | -           | -                      | -                |
| 323-p1    | Spindle Cell      | E030037K03Rik | MGI | ENSMUSG00000073491 | ENSMUST00000150649 | NON_SYNONYMOUS_CODING | 1418              | 452 H/R              | chr1       | 175512313 | T   | C   | DELETTERIOUS  | 0           | 4.32 possibly damaging | 1.8              |
| 323-p1    | Spindle Cell      | E030037K03Rik | MGI | ENSMUSG00000073491 | ENSMUST00000150649 | NON_SYNONYMOUS_CODING | 1407              | 448 R/S              | chr1       | 175512324 | C   | A   | DELETTERIOUS  | 0.01        | 4.32 benign            | 0.45             |
| 323-p1    | Spindle Cell      | E330021D16Rik | MGI | ENSMUSG00000045291 | ENSMUST00000058713 | NON_SYNONYMOUS_CODING | 375               | 26 V/M               | chr6       | 136351777 | C   | T   | TOLERATED     | 0.37        | 3.35 benign            | 0.669            |
| 323-p1    | Spindle Cell      | Ears2         | MGI | ENSMUSG00000030871 | ENSMUST00000033159 | NON_SYNONYMOUS_CODING | 1670              | 484 V/M              | chr7       | 129183264 | C   | T   | TOLERATED     | 0.31        | 2.78 benign            | 0.202            |
| 323-p1    | Spindle Cell      | Eef2          | MGI | ENSMUSG00000034994 | ENSMUST00000047864 | NON_SYNONYMOUS_CODING | 458               | 126 L/P              | chr10      | 80640956  | T   | C   | DELETTERIOUS  | 0           | 2.79 probably damaging | 2.531            |
| 323-p1    | Spindle Cell      | Epn3          | MGI | ENSMUSG00000010080 | ENSMUST00000127305 | NON_SYNONYMOUS_CODING | 842               | 141 R/W              | chr11      | 94357436  | G   | A   | DELETTERIOUS  | 0           | 2.78 probably damaging | 2.596            |
| 323-p1    | Spindle Cell      | Fcrl6         | MGI | ENSMUSG00000070504 | ENSMUST00000094303 | NON_SYNONYMOUS_CODING | 33                | 11 E/D               | chr1       | 174530187 | C   | A   | TOLERATED     | 0.36        | 3.33 benign            | 0.069            |
| 323-p1    | Spindle Cell      | Gle1          | MGI | ENSMUSG00000019715 | ENSMUST00000019859 | NON_SYNONYMOUS_CODING | 1801              | 576 R/H              | chr2       | 29806199  | G   | A   | DELETTERIOUS  | 0.03        | 2.77 probably damaging | 2.238            |
| 323-p1    | Spindle Cell      | Gm10010       | MGI | ENSMUSG00000056771 | ENSMUST00000071101 | NON_SYNONYMOUS_CODING | 202               | 68 E/K               | chr6       | 128150440 | C   | T   | -             | -           | unknown                | -                |
| 323-p1    | Spindle Cell      | Gm2399        | MGI | ENSMUSG00000005397 | ENSMUST00000005532 | NON_SYNONYMOUS_CODING | 249               | 80 G/S               | chr13      | 13556001  | G   | A   | DELETTERIOUS  | 0           | 2.89 possibly damaging | 1.917            |
| 323-p1    | Spindle Cell      | Gm766         | MGI | ENSMUSG00000048473 | ENSMUST00000111768 | NON_SYNONYMOUS_CODING | 8                 | 3 C/S                | chr6       | 142752903 | C   | G   | DELETTERIOUS  | 0           | 4.32 benign            | 0.426            |
| 323-p1    | Spindle Cell      | Gsg1          | MGI | ENSMUSG00000030206 | ENSMUST00000087729 | NON_SYNONYMOUS_CODING | 983               | 287 S/A              | chr6       | 135187668 | C   | T   | TOLERATED     | 0.28        | 3.57 benign            | 1.22             |
| 323-p1    | Spindle Cell      | Hsd12         | MGI | ENSMUSG00000028383 | ENSMUST00000030078 | NON_SYNONYMOUS_CODING | 1193              | 333 E/Q              | chr4       | 59623513  | G   | C   | TOLERATED     | 0.17        | 4.32 unknown           | -                |
| 323-p1    | Spindle Cell      | Htgb4         | MGI | ENSMUSG00000010641 | ENSMUST00000106461 | NON_SYNONYMOUS_CODING | 3069              | 877 T/A              | chr11      | 115853213 | A   | G   | TOLERATED     | 1           | 3.55 benign            | 0.224            |
| 323-p1    | Spindle Cell      | Klrc3         | MGI | ENSMUSG00000033027 | ENSMUST00000053164 | NON_SYNONYMOUS_CODING | 773               | 245 P/T              | chr6       | 129589111 | G   | T   | DELETTERIOUS  | 0           | 3.47 probably damaging | 2.017            |
| 323-p1    | Spindle Cell      | Map3k15       | MGI | ENSMUSG00000031303 | ENSMUST00000033665 | STOP_GAINED           | 3817              | 1273 Q/*             | chrX       | 156560365 | C   | T   | -             | -           | unknown                | -                |
| 323-p1    | Spindle Cell      | Mei1          | MGI | ENSMUSG00000068117 | ENSMUST00000089178 | NON_SYNONYMOUS_CODING | 2834              | 825 L/R              | chr15      | 81955359  | T   | G   | DELETTERIOUS  | 0           | 4.32 possibly damaging | 1.873            |
| 323-p1    | Spindle Cell      | Mgat5b        | MGI | ENSMUSG00000043857 | ENSMUST00000103027 | NON_SYNONYMOUS_CODING | 2561              | 650 L/V              | chr11      | 116846213 | C   | G   | TOLERATED     | 1           | 4.32 benign            | 0.087            |
| 323-p1    | Spindle Cell      | Mgst1         | MGI | ENSMUSG00000008540 | ENSMUST00000118091 | NON_SYNONYMOUS_CODING | 206               | 34 R/G               | chr6       | 138090312 | A   | G   | Not Scored    | -           | unknown                | -                |
| 323-p1    | Spindle Cell      | Midl1         | MGI | ENSMUSG00000035299 | ENSMUST00000112104 | NON_SYNONYMOUS_CODING | 2109              | 627 S/A              | chrX       | 166426979 | G   | G   | TOLERATED     | 0.22        | 2.83 benign            | 0.167            |
| 323-p1    | Spindle Cell      | Nid1          | MGI | ENSMUSG00000005397 | ENSMUST00000005532 | NON_SYNONYMOUS_CODING | 249               | 80 G/S               | chr13      | 13556001  | G   | A   | DELETTERIOUS  | 0           | 2.89 possibly damaging | 1.917            |
| 323-p1    | Spindle Cell      | Nipal2        | MGI | ENSMUSG00000038879 | ENSMUST00000040791 | NON_SYNONYMOUS_CODING | 1395              | 292 I/F              | chr15      | 34512482  | T   | A   | DELETTERIOUS  | 0.04        | 2.81 possibly damaging | 1.523            |
| 323-p1    | Spindle Cell      | Nrip2         | MGI | ENSMUSG00000001520 | ENSMUST00000120405 | NON_SYNONYMOUS_CODING | 615               | 158 P/S              | chr6       | 128357421 | C   | T   | TOLERATED     | 0.2         | 3.09 benign            | 0.739            |
| 323-p1    | Spindle Cell      | Obscn         | MGI | ENSMUSG00000061462 | ENSMUST00000020732 | NON_SYNONYMOUS_CODING | 2608              | 861 L/M              | chr11      | 58943339  | G   | T   | TOLERATED     | 0.13        | 2.84 unknown           | 0.461            |
| 323-p1    | Spindle Cell      | Ocm           | MGI | ENSMUSG00000029618 | ENSMUST00000085704 | NON_SYNONYMOUS_CODING | 250               | 41 A/P               | chr5       | 144785370 | C   | G   | TOLERATED     | 0.16        | 3.35 benign            | 0.436            |
| 323-p1    | Spindle Cell      | Ocr1          | MGI | ENSMUSG00000001173 | ENSMUST00000001202 | NON_SYNONYMOUS_CODING | 1561              | 432 S/T              | chrX       | 45291529  | G   | C   | TOLERATED     | 0.3         | 2.87 benign            | 0.171            |
| 323-p1    | Spindle Cell      | Odz1          | MGI | ENSMUSG00000016150 | ENSMUST00000115059 | NON_SYNONYMOUS_CODING | 7913              | 2610 T/I             | chrX       | 39886009  | G   | A   | DELETTERIOUS  | 0           | 3.05 probably damaging | 2.098            |
| 323-p1    | Spindle Cell      | Palm2         | MGI | ENSMUSG00000090053 | ENSMUST00000102905 | NON_SYNONYMOUS_CODING | 474               | 55 V/I               | chr4       | 57660898  | G   | A   | TOLERATED     | 0.59        | 2.86 benign            | 0.461            |
| 323-p1    | Spindle Cell      | Pde3a         | MGI | ENSMUSG00000041741 | ENSMUST00000043259 | NON_SYNONYMOUS_CODING | 1159              | 387 I/F              | chr6       | 141407730 | A   | T   | TOLERATED     | 0.07        | 3.03 benign            | 1.394            |
| 323-p1    | Spindle Cell      | Pick1         | MGI | ENSMUSG00000068206 | ENSMUST00000053926 | NON_SYNONYMOUS_CODING | 1600              | 461 R/K              | chr15      | 79086314  | G   | A   | DELETTERIOUS  | 0.01        | 4.32 unknown           | -                |
| 323-p1    | Spindle Cell      | Ppfbp1        | MGI | ENSMUSG00000016487 | ENSMUST00000111623 | NON_SYNONYMOUS_CODING | 1326              | 371 L/P              | chr6       | 146954499 | T   | C   | TOLERATED     | 0.3         | 2.99 benign            | 0.114            |
| 323-p1    | Spindle Cell      | Prrmp5        | MGI | ENSMUSG00000052262 | ENSMUST00000048686 | NON_SYNONYMOUS_CODING | 581               | 185 Q/K              | chr6       | 132262325 | G   | T   | TOLERATED     | 0.36        | 2.86 unknown           | -                |
| 323-p1    | Spindle Cell      | Sectm1b       | MGI | ENSMUSG00000039364 | ENSMUST00000039309 | NON_SYNONYMOUS_CODING | 571               | 114 E/K              | chr11      | 120917042 | C   | T   | TOLERATED     | 0.83        | 3.36 benign            | 1.311            |
| 323-p1    | Spindle Cell      | Sicot1c1      | MGI | ENSMUSG00000030235 | ENSMUST00000111837 | NON_SYNONYMOUS_CODING | 1309              | 311 N/D              | chr6       | 141495341 | A   | G   | TOLERATED     | 0.94        | 2.81 benign            | 0.53             |
| 323-p1    | Spindle Cell      | St6galnac1    | MGI | ENSMUSG00000009588 | ENSMUST00000009732 | NON_SYNONYMOUS_CODING | 207               | 34 R/S               | chr11      | 116636615 | C   | A   | TOLERATED     | 0.49        | 4.32 benign            | 0.237            |
| 323-p1    | Spindle Cell      | Tex19.2       | MGI | ENSMUSG00000039337 | ENSMUST00000039146 | NON_SYNONYMOUS_CODING | 1582              | 314 D/E              | chr11      | 120977993 | A   | C   | Not Scored    | -           | benign                 | 0.675            |
| 323-p1    | Spindle Cell      | Timm9         | MGI | ENSMUSG00000021079 | ENSMUST00000021486 | NON_SYNONYMOUS_CODING | 412               | 89 R/P               | chr12      | 7224544   | G   | A   | DELETTERIOUS  | 0           | 4.32 probably damaging | 2.257            |
| 323-p1    | Spindle Cell      | Tmem67        | MGI | ENSMUSG00000049488 | ENSMUST00000108293 | NON_SYNONYMOUS_CODING | 669               | 26 Q/P               | chr4       | 12016499  | T   | G   | Not Scored    | -           | benign                 | 1.35             |
| 323-p1    | Spindle Cell      | Tpm2          | MGI | ENSMUSG00000028464 | ENSMUST00000034926 | NON_SYNONYMOUS_CODING | 907               | 266 I/T              | chr4       | 43531717  | A   | G   | TOLERATED     | 1           | 4.32 unknown           | -                |
| 323-p1    | Spindle Cell      | Tro           | MGI | ENSMUSG00000025272 | ENSMUST00000087258 | NON_SYNONYMOUS_CODING | 1283              | 406 N/S              | chrX       | 14708988  | T   | C   | TOLERATED     | 0.74        | 3.45 benign            | 1.125            |
| 323-p1    | Spindle Cell      | Tro           | MGI | ENSMUSG00000025272 | ENSMUST00000087258 | NON_SYNONYMOUS_CODING | 1275              | 403 D/E              | chrX       | 14708989  | A   | C   | TOLERATED     | 1           | 3.45 benign            | 0.9              |
| 323-p1    | Spindle Cell      | Trp53         | MGI | ENSMUSG00000059552 | ENSMUST00000108658 | NON_SYNONYMOUS_CODING | 862               | 245 R/H              | chr11      | 69402713  | G   | A   | DELETTERIOUS  | 0           | 2.77 probably damaging | 2.45             |
| 323-p1    | Spindle Cell      | Tubb3         | MGI | ENSMUSG00000062380 | ENSMUST00000071134 | NON_SYNONYMOUS_CODING | 1009              | 276 R/Q              | chr8       | 125945056 | G   | A   | DELETTERIOUS  | 0           | 4.2 probably damaging  | 1.773            |
| 323-p1    | Spindle Cell      | Wwtr1         | MGI | ENSMUSG00000027803 | ENSMUST00000120977 | NON_SYNONYMOUS_CODING | 976               | 316 A/S              | chr3       | 57267480  | C   | A   | DELETTERIOUS  | 0.02        | 3.12 benign            | 1.259            |
| 323-p1    | Spindle Cell      | Zdhc4         | MGI | ENSMUSG00000001844 | ENSMUST00000001900 | NON_SYNONYMOUS_CODING | 1178              | 300 R/H              | chr5       | 144078354 | C   | T   | TOLERATED     | 0.98        | 2.88 benign            | 0.867            |
| 323-p1    | Spindle Cell      | Zfp217        | MGI | ENSMUSG00000052056 | ENSMUST00000109155 | NON_SYNONYMOUS_CODING | 1927              | 473 P/H              | chr2       | 169941728 | G   | T   | TOLERATED     | 0.38        | 2.99 benign            | 0.894            |
| 323-p1    | Spindle Cell      | Zkscan16      | MGI | ENSMUSG00000038630 | ENSMUST00000107554 | NON_SYNONYMOUS_CODING | 166               | 3 G/A                | chr4       | 58959006  | G   | C   | TOLERATED     | 1           | 4.32 benign            | 0.039            |
| 323-p2    | Spindle Cell      | 170023A16Rik  | MGI | ENSMUSG00000030292 | ENSMUST00000111634 | NON_SYNONYMOUS_CODING | 659               | 219 T/N              | chr6       | 146810206 | C   | A   | TOLERATED     | 0.38        | 4.32 benign            | 0.08             |
| 323-p2    | Spindle Cell      | 2310022A10Rik | MGI | ENSMUSG00000049643 | ENSMUST00000067386 | NON_SYNONYMOUS_CODING | 313               | 105 A/P              | chr7       | 28350678  | C   | C   | TOLERATED     | 0.28        | 3.21 benign            | 0.071            |

Supplementary Table 3. Predicted somatic mutations in tumors

| Sample Id | Histological type | GeneName      | DB | Gene               | Transcript          | Consequence             | Amino_a         |                    |          |       |           | Ref | Var | Effect (SIFT) | Median       |                        |                   | Score (Polyphen) |
|-----------|-------------------|---------------|----|--------------------|---------------------|-------------------------|-----------------|--------------------|----------|-------|-----------|-----|-----|---------------|--------------|------------------------|-------------------|------------------|
|           |                   |               |    |                    |                     |                         | Position_n_cDNA | Position_n_protein | cid_chan | me    | Position  |     |     |               | Score (SIFT) | Info (SIFT)            | Effect (Polyphen) |                  |
| 323-p2    | Spindle Cell      | 5330439B14Rik | MG | ENSMUSG00000041614 | ENSMUST00000040390  | NON_SYNONYMOUS_CODING   | 626             | 96                 | L/V      | chr6  | 142574216 | C   | G   | -             | -            | unknown                | -                 |                  |
| 323-p2    | Spindle Cell      | Adcy5         | MG | ENSMUSG00000022840 | ENSMUST00000023549  | NON_SYNONYMOUS_CODING   | 3992            | 924                | V/M      | chr16 | 35291630  | G   | A   | DELETERIOUS   | 0            | 2.77 benign            | 0.399             |                  |
| 323-p2    | Spindle Cell      | Akap14        | MG | ENSMUSG00000036551 | ENSMUST00000046557  | NON_SYNONYMOUS_CODING   | 827             | 248                | A/V      | chrX  | 34703333  | G   | A   | TOLERATED     | 0.12         | 3.14 unknown           | -                 |                  |
| 323-p2    | Spindle Cell      | Atf7ip        | MG | ENSMUSG00000032013 | ENSMUST00000032335  | NON_SYNONYMOUS_CODING   | 981             | 287                | D/E      | chr6  | 136509152 | T   | A   | TOLERATED     | 1            | 2.91 benign            | 0.073             |                  |
| 323-p2    | Spindle Cell      | B3galt1       | MG | ENSMUSG00000034780 | ENSMUST00000042456  | STOP_GAINED             | 1100            | 273                | R/*      | chr2  | 67956816  | C   | T   | -             | -            | unknown                | -                 |                  |
| 323-p2    | Spindle Cell      | BC049715      | MG | ENSMUSG00000047515 | ENSMUST00000052702  | NON_SYNONYMOUS_CODING   | 1008            | 221                | E/K      | chr6  | 136788945 | G   | A   | TOLERATED     | 0.35         | 3.67 benign            | 0.309             |                  |
| 323-p2    | Spindle Cell      | Bcat1         | MG | ENSMUSG00000030268 | ENSMUST00000087468  | NON_SYNONYMOUS_CODING   | 762             | 240                | L/P      | chr6  | 144967868 | A   | G   | DELETERIOUS   | 0            | 2.8 probably damaging  | 2.618             |                  |
| 323-p2    | Spindle Cell      | Bcl2l14       | MG | ENSMUSG00000030200 | ENSMUST00000032321  | NON_SYNONYMOUS_CODING   | 1065            | 269                | R/Q      | chr6  | 134382288 | G   | A   | TOLERATED     | 1            | 3.71 benign            | 0.614             |                  |
| 323-p2    | Spindle Cell      | Cfhr2         | MG | ENSMUSG00000033898 | ENSMUST00000094484  | NON_SYNONYMOUS_CODING   | 96              | 12                 | I/L      | chr1  | 141915392 | T   | G   | TOLERATED     | 0.11         | 3.42 unknown           | -                 |                  |
| 323-p2    | Spindle Cell      | Chd4          | MG | ENSMUSG00000063870 | ENSMUST00000112390  | NON_SYNONYMOUS_CODING   | 4976            | 1600               | P/T      | chr6  | 125072159 | C   | A   | DELETERIOUS   | 0.04         | 3.32 possibly damaging | 1.8               |                  |
| 323-p2    | Spindle Cell      | Chd5          | MG | ENSMUSG00000050545 | ENSMUST00000030775  | NON_SYNONYMOUS_CODING   | 4194            | 1298               | R/L      | chr4  | 151751234 | G   | T   | TOLERATED     | 0.23         | 2.82 possibly damaging | 1.828             |                  |
| 323-p2    | Spindle Cell      | Ctnnap4       | MG | ENSMUSG00000031772 | ENSMUST000000118171 | ESSENTIAL_SPLICING_SITE | 0               | 0                  | -        | chr8  | 115334642 | G   | C   | -             | -            | unknown                | -                 |                  |
| 323-p2    | Spindle Cell      | Col27a1       | MG | ENSMUSG00000045672 | ENSMUST00000036300  | NON_SYNONYMOUS_CODING   | 3919            | 1176               | E/D      | chr4  | 62967737  | G   | C   | -             | -            | unknown                | -                 |                  |
| 323-p2    | Spindle Cell      | E030037K03Rik | MG | ENSMUSG00000073491 | ENSMUST00000150649  | NON_SYNONYMOUS_CODING   | 1058            | 332                | T/I      | chr1  | 175519981 | G   | A   | DELETERIOUS   | 0            | 4.32 possibly damaging | 1.711             |                  |
| 323-p2    | Spindle Cell      | Ears2         | MG | ENSMUSG00000030871 | ENSMUST00000033159  | NON_SYNONYMOUS_CODING   | 1670            | 484                | V/M      | chr7  | 129183264 | C   | T   | TOLERATED     | 0.31         | 2.78 benign            | 0.202             |                  |
| 323-p2    | Spindle Cell      | Eef2          | MG | ENSMUSG00000034994 | ENSMUST00000047864  | NON_SYNONYMOUS_CODING   | 458             | 126                | L/P      | chr10 | 80640956  | T   | C   | DELETERIOUS   | 0            | 2.79 probably damaging | 2.531             |                  |
| 323-p2    | Spindle Cell      | Eef2          | MG | ENSMUSG00000034994 | ENSMUST00000047864  | ESSENTIAL_SPLICING_SITE | 0               | 0                  | -        | chr10 | 80641824  | A   | T   | -             | -            | unknown                | -                 |                  |
| 323-p2    | Spindle Cell      | Gle1          | MG | ENSMUSG00000019715 | ENSMUST00000019859  | NON_SYNONYMOUS_CODING   | 1801            | 576                | R/H      | chr2  | 29806199  | G   | A   | DELETERIOUS   | 0.03         | 2.77 probably damaging | 2.238             |                  |
| 323-p2    | Spindle Cell      | Gm10010       | MG | ENSMUSG00000056771 | ENSMUST00000071101  | NON_SYNONYMOUS_CODING   | 202             | 68                 | E/K      | chr6  | 128150440 | C   | T   | -             | -            | unknown                | -                 |                  |
| 323-p2    | Spindle Cell      | Gm2399        | MG | ENSMUSG00000005397 | ENSMUST00000005532  | NON_SYNONYMOUS_CODING   | 249             | 80                 | G/S      | chr13 | 13556001  | G   | A   | DELETERIOUS   | 0            | 2.89 possibly damaging | 1.917             |                  |
| 323-p2    | Spindle Cell      | Gna15         | MG | ENSMUSG00000034792 | ENSMUST00000043709  | NON_SYNONYMOUS_CODING   | 506             | 79                 | R/W      | chr10 | 80977077  | G   | A   | DELETERIOUS   | 0            | 2.88 probably damaging | 2.506             |                  |
| 323-p2    | Spindle Cell      | Gsg1          | MG | ENSMUSG00000030206 | ENSMUST00000087729  | NON_SYNONYMOUS_CODING   | 983             | 287                | S/N      | chr6  | 135187668 | C   | T   | TOLERATED     | 0.28         | 3.57 benign            | 1.22              |                  |
| 323-p2    | Spindle Cell      | Hsd12         | MG | ENSMUSG00000028383 | ENSMUST00000030078  | NON_SYNONYMOUS_CODING   | 1193            | 333                | E/Q      | chr4  | 59623513  | G   | C   | TOLERATED     | 0.17         | 4.32 unknown           | -                 |                  |
| 323-p2    | Spindle Cell      | Ilgb4         | MG | ENSMUSG00000020758 | ENSMUST00000106461  | NON_SYNONYMOUS_CODING   | 3069            | 877                | T/A      | chr11 | 115853213 | A   | G   | TOLERATED     | 1            | 3.55 benign            | 0.224             |                  |
| 323-p2    | Spindle Cell      | Klra11        | MG | ENSMUSG00000033024 | ENSMUST00000088019  | NON_SYNONYMOUS_CODING   | 193             | 13                 | L/F      | chr6  | 130141283 | G   | A   | TOLERATED     | 1            | 2.78 benign            | 0.953             |                  |
| 323-p2    | Spindle Cell      | Klra21        | MG | ENSMUSG00000033024 | ENSMUST00000088019  | NON_SYNONYMOUS_CODING   | 193             | 13                 | L/F      | chr6  | 130141283 | G   | A   | TOLERATED     | 1            | 2.78 benign            | 0.953             |                  |
| 323-p2    | Spindle Cell      | Klra9         | MG | ENSMUSG00000033024 | ENSMUST00000088019  | NON_SYNONYMOUS_CODING   | 193             | 13                 | L/F      | chr6  | 130141283 | G   | A   | TOLERATED     | 1            | 2.78 benign            | 0.953             |                  |
| 323-p2    | Spindle Cell      | Megf10        | MG | ENSMUSG00000024593 | ENSMUST00000075770  | NON_SYNONYMOUS_CODING   | 3420            | 921                | N/T      | chr18 | 57448970  | A   | C   | TOLERATED     | 0.24         | 3.36 benign            | 1.455             |                  |
| 323-p2    | Spindle Cell      | Mgat5b        | MG | ENSMUSG00000043857 | ENSMUST00000103027  | NON_SYNONYMOUS_CODING   | 2561            | 650                | L/V      | chr11 | 116846213 | C   | G   | TOLERATED     | 1            | 4.32 benign            | 0.087             |                  |
| 323-p2    | Spindle Cell      | Mgst1         | MG | ENSMUSG00000008540 | ENSMUST00000118091  | NON_SYNONYMOUS_CODING   | 206             | 34                 | R/G      | chr6  | 138090312 | A   | G   | Not Scored    | -            | unknown                | -                 |                  |
| 323-p2    | Spindle Cell      | Mid1          | MG | ENSMUSG00000035299 | ENSMUST00000112104  | NON_SYNONYMOUS_CODING   | 2109            | 627                | S/A      | chrX  | 166426979 | G   | G   | TOLERATED     | 0.22         | 2.83 benign            | 0.167             |                  |
| 323-p2    | Spindle Cell      | Nid1          | MG | ENSMUSG00000005397 | ENSMUST00000005532  | NON_SYNONYMOUS_CODING   | 249             | 80                 | G/S      | chr13 | 13556001  | G   | A   | DELETERIOUS   | 0            | 2.89 possibly damaging | 1.917             |                  |
| 323-p2    | Spindle Cell      | Nipal2        | MG | ENSMUSG00000038879 | ENSMUST00000040791  | NON_SYNONYMOUS_CODING   | 1395            | 292                | I/F      | chr15 | 34512482  | T   | A   | DELETERIOUS   | 0.04         | 2.81 possibly damaging | 1.523             |                  |
| 323-p2    | Spindle Cell      | Nrip2         | MG | ENSMUSG0000001520  | ENSMUST00000120405  | NON_SYNONYMOUS_CODING   | 615             | 158                | P/S      | chr6  | 128357421 | C   | T   | TOLERATED     | 0.2          | 3.09 benign            | 0.739             |                  |
| 323-p2    | Spindle Cell      | Obscn         | MG | ENSMUSG00000061462 | ENSMUST00000020732  | NON_SYNONYMOUS_CODING   | 2608            | 861                | L/M      | chr11 | 58943339  | G   | T   | TOLERATED     | 0.13         | 2.84 unknown           | -                 |                  |
| 323-p2    | Spindle Cell      | Ocr1          | MG | ENSMUSG00000001173 | ENSMUST00000001202  | NON_SYNONYMOUS_CODING   | 1561            | 432                | S/T      | chrX  | 45291529  | C   | C   | TOLERATED     | 0.3          | 2.87 benign            | 0.171             |                  |
| 323-p2    | Spindle Cell      | Palm2         | MG | ENSMUSG00000090053 | ENSMUST00000102905  | NON_SYNONYMOUS_CODING   | 474             | 55                 | V/I      | chr4  | 57660898  | G   | A   | TOLERATED     | 0.59         | 2.86 benign            | 0.461             |                  |
| 323-p2    | Spindle Cell      | Pde3a         | MG | ENSMUSG00000041741 | ENSMUST00000043259  | NON_SYNONYMOUS_CODING   | 1159            | 387                | I/F      | chr6  | 141407730 | A   | T   | TOLERATED     | 0.07         | 3.03 benign            | 1.394             |                  |
| 323-p2    | Spindle Cell      | Pick1         | MG | ENSMUSG00000068206 | ENSMUST00000053926  | NON_SYNONYMOUS_CODING   | 1600            | 461                | R/K      | chr15 | 79086314  | G   | A   | DELETERIOUS   | 0.01         | 4.32 unknown           | -                 |                  |
| 323-p2    | Spindle Cell      | Ppfbp1        | MG | ENSMUSG00000016487 | ENSMUST00000111623  | NON_SYNONYMOUS_CODING   | 1326            | 371                | L/P      | chr6  | 146954499 | T   | C   | TOLERATED     | 0.3          | 2.99 benign            | 0.114             |                  |
| 323-p2    | Spindle Cell      | Prmp5         | MG | ENSMUSG00000052262 | ENSMUST00000048686  | NON_SYNONYMOUS_CODING   | 581             | 185                | Q/K      | chr6  | 132262325 | G   | T   | TOLERATED     | 0.36         | 2.86 unknown           | -                 |                  |
| 323-p2    | Spindle Cell      | Slco1c1       | MG | ENSMUSG00000030235 | ENSMUST00000111837  | NON_SYNONYMOUS_CODING   | 1309            | 311                | N/D      | chr6  | 141495341 | A   | G   | TOLERATED     | 0.94         | 2.81 benign            | 0.53              |                  |
| 323-p2    | Spindle Cell      | Slg6galnac1   | MG | ENSMUSG00000009588 | ENSMUST00000009732  | NON_SYNONYMOUS_CODING   | 207             | 34                 | R/S      | chr11 | 116636615 | C   | A   | TOLERATED     | 0.49         | 4.32 benign            | 0.237             |                  |
| 323-p2    | Spindle Cell      | Tex19.2       | MG | ENSMUSG00000039337 | ENSMUST00000039146  | NON_SYNONYMOUS_CODING   | 1582            | 314                | D/E      | chr11 | 120977993 | A   | C   | Not Scored    | -            | benign                 | 0.675             |                  |
| 323-p2    | Spindle Cell      | Timm9         | MG | ENSMUSG00000021079 | ENSMUST00000021486  | NON_SYNONYMOUS_CODING   | 412             | 89                 | R/W      | chr12 | 72224544  | G   | A   | DELETERIOUS   | 0            | 4.32 probably damaging | 2.257             |                  |
| 323-p2    | Spindle Cell      | Tmem67        | MG | ENSMUSG00000049488 | ENSMUST00000108293  | NON_SYNONYMOUS_CODING   | 669             | 26                 | Q/P      | chr4  | 12016499  | T   | G   | Not Scored    | -            | benign                 | 1.35              |                  |
| 323-p2    | Spindle Cell      | Tpm2          | MG | ENSMUSG00000028464 | ENSMUST00000034926  | NON_SYNONYMOUS_CODING   | 907             | 266                | I/T      | chr4  | 43531717  | A   | G   | TOLERATED     | 1            | 4.32 unknown           | -                 |                  |
| 323-p2    | Spindle Cell      | Tro           | MG | ENSMUSG00000025272 | ENSMUST00000087258  | NON_SYNONYMOUS_CODING   | 1283            | 406                | N/S      | chrX  | 147088986 | T   | C   | TOLERATED     | 0.74         | 3.45 benign            | 1.125             |                  |
| 323-p2    | Spindle Cell      | Tro           | MG | ENSMUSG00000025272 | ENSMUST00000087258  | NON_SYNONYMOUS_CODING   | 1275            | 403                | D/E      | chrX  | 147088994 | A   | C   | TOLERATED     | 1            | 3.45 benign            | 0.9               |                  |
| 323-p2    | Spindle Cell      | Trp53         | MG | ENSMUSG00000059552 | ENSMUST00000108658  | NON_SYNONYMOUS_CODING   | 862             | 245                | R/H      | chr11 | 69402713  | G   | A   | DELETERIOUS   | 0            | 2.77 probably damaging | 2.45              |                  |
| 323-p2    | Spindle Cell      | Tubb3         | MG | ENSMUSG00000062380 | ENSMUST00000071134  | NON_SYNONYMOUS_CODING   | 1009            | 276                | R/Q      | chr8  | 125945056 | G   | A   | DELETERIOUS   | 0            | 4.2 probably damaging  | 1.773             |                  |
| 323-p2    | Spindle Cell      | Zdhhc4        | MG | ENSMUSG00000001844 | ENSMUST00000001900  | NON_SYNONYMOUS_CODING   | 1178            | 300                | R/H      | chr5  | 144078354 | C   | T   | TOLERATED     | 0.98         | 2.88 benign            | 0.867             |                  |
| 323-p2    | Spindle Cell      | Zfp217        | MG | ENSMUSG00000052056 | ENSMUST00000109155  | NON_SYNONYMOUS_CODING   | 1927            | 473                | P/H      | chr2  | 169941728 | G   | T   | TOLERATED     | 0.38         | 2.99 benign            | 0.894             |                  |
| 323-p2    | Spindle Cell      | Zkscan16      | MG | ENSMUSG00000038630 | ENSMUST00000107554  | NON_SYNONYMOUS_CODING   | 166             | 3                  | G/A      | chr4  | 58959006  | G   | C   | TOLERATED     | 1            | 4.32 benign            | 0.039             |                  |
| 323-p3    | Spindle Cell      | 1700023A16Rik | MG | ENSMUSG00000030292 | ENSMUST00000111634  | NON_SYNONYMOUS_CODING   | 659             | 219                | T/N      | chr6  | 146810206 | C   | A   | TOLERATED     | 0.38         | 4.32 benign            | 0.08              |                  |
| 323-p3    | Spindle Cell      | 2310022A10Rik | MG | ENSMUSG00000049643 | ENSMUST00000067386  | NON_SYNONYMOUS_CODING   | 313             | 105                | A/P      | chr7  | 28350678  | C   | C   | TOLERATED     | 0.28         | 3.21 benign            | 0.071             |                  |
| 323-p3    | Spindle Cell      | 493043311Rik  | MG | ENSMUSG00000049062 | ENSMUST00000056767  | NON_SYNONYMOUS_CODING   | 694             | 232                | P/A      | chr7  | 48248972  | G   | C   | -             | -            | -                      | -                 |                  |
| 323-p3    | Spindle Cell      | 493043311Rik  | MG | ENSMUSG00000049062 | ENSMUST00000056767  | NON_SYNONYMOUS_CODING   | 706             | 236                | L/M      | chr7  | 48248984  | C   | A   | -             | -            | -                      | -                 |                  |
| 323-p3    | Spindle Cell      | 493043311Rik  | MG | ENSMUSG00000049062 | ENSMUST00000056767  | NON_SYNONYMOUS_CODING   | 1007            | 336                | L/H      | chr7  | 48249285  | T   | A   | -             | -            | -                      | -                 |                  |
| 323-p3    | Spindle Cell      | 5330439B14Rik | MG | ENSMUSG00000041614 | ENSMUST00000040390  | NON_SYNONYMOUS_CODING   | 626             | 96                 | L/V      | chr6  | 142574216 | C   | G   | -             | -            | unknown                | -                 |                  |

**Supplementary Table 3. Predicted somatic mutations in tumors**

| Sample Id | Histological type | GeneName      | DB | Gene                | Transcript         | Consequence           | Amino_a         |                    |          |            | Position  | Ref | Var | Effect (SIFT) | Median       |             |                   | Score (Polyphen en) |
|-----------|-------------------|---------------|----|---------------------|--------------------|-----------------------|-----------------|--------------------|----------|------------|-----------|-----|-----|---------------|--------------|-------------|-------------------|---------------------|
|           |                   |               |    |                     |                    |                       | Position_n_cDNA | Position_n_protein | cid_chan | Chromosome |           |     |     |               | Score (SIFT) | Info (SIFT) | Effect (Polyphen) |                     |
| 323-p3    | Spindle Cell      | Adcy5         | MG | ENSMUSG00000022840  | ENSMUST00000023549 | NON_SYNONYMOUS_CODING | 3992            | 924                | V/M      | chr16      | 35291630  | G   | A   | DELETTERIOUS  | 0            | 2.77        | benign            | 0.399               |
| 323-p3    | Spindle Cell      | Akap14        | MG | ENSMUSG00000036551  | ENSMUST00000046557 | NON_SYNONYMOUS_CODING | 827             | 248                | A/V      | chrX       | 34703333  | G   | A   | TOLERATED     | 0.12         | 3.14        | unknown           | -                   |
| 323-p3    | Spindle Cell      | Atf7ip        | MG | ENSMUSG00000030213  | ENSMUST00000032335 | NON_SYNONYMOUS_CODING | 981             | 287                | D/E      | chr6       | 136509152 | T   | A   | TOLERATED     | 1            | 2.91        | benign            | 0.073               |
| 323-p3    | Spindle Cell      | Atf7ip        | MG | ENSMUSG00000030213  | ENSMUST00000032335 | NON_SYNONYMOUS_CODING | 1760            | 547                | A/V      | chr6       | 136509931 | C   | T   | TOLERATED     | 0.65         | 2.91        | benign            | 0.572               |
| 323-p3    | Spindle Cell      | Atp11a        | MG | ENSMUSG00000031441  | ENSMUST00000091237 | NON_SYNONYMOUS_CODING | 2625            | 776                | D/G      | chr8       | 12846118  | A   | G   | TOLERATED     | 0.06         | 3.5         | benign            | 1.329               |
| 323-p3    | Spindle Cell      | B3galt1       | MG | ENSMUSG00000034780  | ENSMUST00000042456 | STOP_GAINED           | 1100            | 273                | R/*      | chr2       | 67956816  | C   | T   | -             | -            | -           | unknown           | -                   |
| 323-p3    | Spindle Cell      | BC049715      | MG | ENSMUSG00000047515  | ENSMUST00000052702 | NON_SYNONYMOUS_CODING | 675             | 110                | A/T      | chr6       | 136788612 | G   | A   | DELETTERIOUS  | 0            | 3.67        | benign            | 0.242               |
| 323-p3    | Spindle Cell      | BC049715      | MG | ENSMUSG00000047515  | ENSMUST00000052702 | NON_SYNONYMOUS_CODING | 1008            | 221                | E/K      | chr6       | 136788945 | G   | A   | TOLERATED     | 0.35         | 3.67        | benign            | 0.309               |
| 323-p3    | Spindle Cell      | Bcat1         | MG | ENSMUSG00000030268  | ENSMUST00000087468 | NON_SYNONYMOUS_CODING | 762             | 240                | L/P      | chr6       | 144967868 | A   | G   | DELETTERIOUS  | 0            | 2.8         | probably damaging | 2.618               |
| 323-p3    | Spindle Cell      | Bcl2l14       | MG | ENSMUSG00000030200  | ENSMUST00000032321 | NON_SYNONYMOUS_CODING | 1065            | 269                | R/Q      | chr6       | 134382288 | G   | A   | TOLERATED     | 1            | 3.71        | benign            | 0.614               |
| 323-p3    | Spindle Cell      | Blzf1         | MG | ENSMUSG00000026577  | ENSMUST00000027866 | NON_SYNONYMOUS_CODING | 401             | 38                 | E/K      | chr1       | 166232801 | C   | T   | TOLERATED     | 0.13         | 3.84        | benign            | 0.488               |
| 323-p3    | Spindle Cell      | Butr1         | MG | ENSMUSG00000020490  | ENSMUST00000069941 | NON_SYNONYMOUS_CODING | 1484            | 399                | K/N      | chr11      | 58737194  | G   | C   | TOLERATED     | 1            | 2.78        | benign            | 0.858               |
| 323-p3    | Spindle Cell      | Cd244         | MG | ENSMUSG00000004709  | ENSMUST00000004829 | NON_SYNONYMOUS_CODING | 182             | 17                 | H/P      | chr1       | 173489505 | A   | C   | TOLERATED     | 0.18         | 2.88        | probably damaging | 2.656               |
| 323-p3    | Spindle Cell      | Cep68         | MG | ENSMUSG000000044066 | ENSMUST00000050611 | NON_SYNONYMOUS_CODING | 832             | 227                | P/A      | chr11      | 20140335  | G   | C   | TOLERATED     | 0.26         | 3.44        | possibly damaging | 1.951               |
| 323-p3    | Spindle Cell      | Cfhr2         | MG | ENSMUSG00000033898  | ENSMUST00000094484 | NON_SYNONYMOUS_CODING | 96              | 12                 | I/L      | chr1       | 141915392 | T   | G   | TOLERATED     | 0.11         | 3.42        | unknown           | -                   |
| 323-p3    | Spindle Cell      | Chd4          | MG | ENSMUSG00000063870  | ENSMUST00000112390 | NON_SYNONYMOUS_CODING | 4976            | 1600               | P/T      | chr6       | 125072159 | C   | A   | DELETTERIOUS  | 0.04         | 3.32        | possibly damaging | 1.8                 |
| 323-p3    | Spindle Cell      | Chd5          | MG | ENSMUSG00000005045  | ENSMUST00000030775 | NON_SYNONYMOUS_CODING | 4194            | 1298               | R/L      | chr4       | 151751234 | G   | T   | TOLERATED     | 0.23         | 2.82        | possibly damaging | 1.828               |
| 323-p3    | Spindle Cell      | Cntnap4       | MG | ENSMUSG00000031772  | ENSMUST00000118171 | ESSENTIAL_SPLICE_SITE | 0               | 0                  | -        | chr8       | 115334642 | G   | C   | -             | -            | -           | -                 | -                   |
| 323-p3    | Spindle Cell      | Col27a1       | MG | ENSMUSG00000045672  | ENSMUST00000036300 | NON_SYNONYMOUS_CODING | 3919            | 1176               | E/D      | chr4       | 62967737  | G   | C   | -             | -            | -           | unknown           | -                   |
| 323-p3    | Spindle Cell      | Cpne1         | MG | ENSMUSG00000074643  | ENSMUST00000109608 | NON_SYNONYMOUS_CODING | 1171            | 322                | V/M      | chr2       | 155903320 | C   | T   | DELETTERIOUS  | 0            | 2.77        | probably damaging | 2.133               |
| 323-p3    | Spindle Cell      | E030037K03Rik | MG | ENSMUSG00000073491  | ENSMUST00000150649 | NON_SYNONYMOUS_CODING | 1058            | 332                | T/I      | chr1       | 175519981 | G   | A   | DELETTERIOUS  | 0            | 4.32        | possibly damaging | 1.711               |
| 323-p3    | Spindle Cell      | E330021D16Rik | MG | ENSMUSG000000045291 | ENSMUST00000058713 | NON_SYNONYMOUS_CODING | 375             | 26                 | V/M      | chr6       | 136351777 | C   | T   | TOLERATED     | 0.37         | 3.35        | benign            | 0.669               |
| 323-p3    | Spindle Cell      | Ears2         | MG | ENSMUSG00000030871  | ENSMUST00000033159 | NON_SYNONYMOUS_CODING | 1670            | 484                | V/M      | chr7       | 129183264 | C   | T   | TOLERATED     | 0.31         | 2.78        | benign            | 0.202               |
| 323-p3    | Spindle Cell      | Epn3          | MG | ENSMUSG00000010080  | ENSMUST00000127305 | NON_SYNONYMOUS_CODING | 842             | 141                | R/W      | chr11      | 94357436  | G   | A   | DELETTERIOUS  | 0            | 2.78        | probably damaging | 2.596               |
| 323-p3    | Spindle Cell      | Esrrb         | MG | ENSMUSG00000021255  | ENSMUST00000116402 | NON_SYNONYMOUS_CODING | 605             | 202                | N/T      | chr12      | 87846843  | A   | C   | TOLERATED     | 0.57         | 2.8         | benign            | 0.496               |
| 323-p3    | Spindle Cell      | Fam190a       | MG | ENSMUSG00000039578  | ENSMUST00000126214 | NON_SYNONYMOUS_CODING | 1980            | 537                | S/P      | chr6       | 61372965  | T   | C   | DELETTERIOUS  | 0.01         | 3.78        | possibly damaging | 1.773               |
| 323-p3    | Spindle Cell      | Fat1          | MG | ENSMUSG00000070047  | ENSMUST00000098796 | NON_SYNONYMOUS_CODING | 13051           | 4351               | S/P      | chr8       | 46130441  | T   | C   | TOLERATED     | 0.16         | 3.16        | unknown           | -                   |
| 323-p3    | Spindle Cell      | Gle1          | MG | ENSMUSG00000019715  | ENSMUST00000019859 | NON_SYNONYMOUS_CODING | 1801            | 576                | R/H      | chr2       | 29806199  | G   | A   | DELETTERIOUS  | 0.03         | 2.77        | probably damaging | 2.238               |
| 323-p3    | Spindle Cell      | Gm10010       | MG | ENSMUSG00000056771  | ENSMUST00000071101 | NON_SYNONYMOUS_CODING | 202             | 68                 | E/K      | chr6       | 128150440 | C   | T   | -             | -            | -           | unknown           | -                   |
| 323-p3    | Spindle Cell      | Gm10101       | MG | ENSMUSG00000061510  | ENSMUST00000074862 | NON_SYNONYMOUS_CODING | 62              | 21                 | T/I      | chr14      | 47450104  | G   | A   | -             | -            | -           | benign            | 0.675               |
| 323-p3    | Spindle Cell      | Gm10101       | MG | ENSMUSG00000061510  | ENSMUST00000074862 | NON_SYNONYMOUS_CODING | 31              | 11                 | L/F      | chr14      | 47450135  | G   | A   | -             | -            | -           | benign            | 0.837               |
| 323-p3    | Spindle Cell      | Gm2399        | MG | ENSMUSG00000005397  | ENSMUST00000005532 | NON_SYNONYMOUS_CODING | 249             | 80                 | G/S      | chr13      | 13556001  | G   | A   | DELETTERIOUS  | 0            | 2.89        | possibly damaging | 1.917               |
| 323-p3    | Spindle Cell      | Gm766         | MG | ENSMUSG000000048473 | ENSMUST00000111768 | NON_SYNONYMOUS_CODING | 8               | 3                  | C/S      | chr6       | 142752903 | C   | G   | DELETTERIOUS  | 0            | 4.32        | benign            | 0.426               |
| 323-p3    | Spindle Cell      | Gna15         | MG | ENSMUSG00000034792  | ENSMUST00000043709 | NON_SYNONYMOUS_CODING | 506             | 79                 | R/W      | chr10      | 80977077  | G   | A   | DELETTERIOUS  | 0            | 2.88        | probably damaging | 2.506               |
| 323-p3    | Spindle Cell      | Gsg1          | MG | ENSMUSG00000030206  | ENSMUST00000087729 | NON_SYNONYMOUS_CODING | 983             | 287                | S/N      | chr6       | 135187668 | C   | T   | TOLERATED     | 0.28         | 3.57        | benign            | 1.22                |
| 323-p3    | Spindle Cell      | Gsr           | MG | ENSMUSG00000031584  | ENSMUST00000033992 | NON_SYNONYMOUS_CODING | 810             | 170                | T/A      | chr8       | 34784640  | G   | A   | DELETTERIOUS  | 0.01         | 2.77        | possibly damaging | 1.502               |
| 323-p3    | Spindle Cell      | Hsd1l2        | MG | ENSMUSG00000028383  | ENSMUST00000030078 | NON_SYNONYMOUS_CODING | 1193            | 333                | E/Q      | chr4       | 59623513  | G   | C   | TOLERATED     | 0.17         | 4.32        | unknown           | -                   |
| 323-p3    | Spindle Cell      | Ifi272b       | MG | ENSMUSG00000021208  | ENSMUST00000044687 | NON_SYNONYMOUS_CODING | 689             | 209                | A/P      | chr12      | 104689512 | C   | G   | TOLERATED     | 0.1          | 3.11        | unknown           | -                   |
| 323-p3    | Spindle Cell      | Irf2bp1       | MG | ENSMUSG00000044030  | ENSMUST00000053713 | NON_SYNONYMOUS_CODING | 1687            | 439                | D/N      | chr7       | 19591100  | G   | A   | TOLERATED     | 0.19         | 2.99        | benign            | 1.415               |
| 323-p3    | Spindle Cell      | Irf4          | MG | ENSMUSG00000020758  | ENSMUST00000106461 | NON_SYNONYMOUS_CODING | 3069            | 877                | T/A      | chr11      | 115853213 | A   | G   | TOLERATED     | 1            | 3.55        | benign            | 0.224               |
| 323-p3    | Spindle Cell      | Kira11        | MG | ENSMUSG00000033024  | ENSMUST00000088019 | NON_SYNONYMOUS_CODING | 193             | 13                 | L/F      | chr6       | 130141283 | G   | A   | TOLERATED     | 1            | 2.78        | benign            | 0.953               |
| 323-p3    | Spindle Cell      | Kira21        | MG | ENSMUSG00000033024  | ENSMUST00000088019 | NON_SYNONYMOUS_CODING | 193             | 13                 | L/F      | chr6       | 130141283 | G   | A   | TOLERATED     | 1            | 2.78        | benign            | 0.953               |
| 323-p3    | Spindle Cell      | Kira5         | MG | ENSMUSG00000030173  | ENSMUST00000014683 | NON_SYNONYMOUS_CODING | 118             | 4                  | P/A      | chr6       | 129861470 | G   | C   | DELETTERIOUS  | 0            | 2.83        | benign            | 1.316               |
| 323-p3    | Spindle Cell      | Kira9         | MG | ENSMUSG00000033024  | ENSMUST00000088019 | NON_SYNONYMOUS_CODING | 193             | 13                 | L/F      | chr6       | 130141283 | G   | A   | TOLERATED     | 1            | 2.78        | benign            | 0.953               |
| 323-p3    | Spindle Cell      | Map3k15       | MG | ENSMUSG00000031303  | ENSMUST00000033665 | STOP_GAINED           | 3817            | 1273               | Q/*      | chrX       | 156560365 | C   | T   | -             | -            | -           | unknown           | -                   |
| 323-p3    | Spindle Cell      | Megf10        | MG | ENSMUSG00000024593  | ENSMUST00000075770 | NON_SYNONYMOUS_CODING | 3420            | 921                | N/T      | chr18      | 57448970  | A   | C   | TOLERATED     | 0.24         | 3.36        | benign            | 1.455               |
| 323-p3    | Spindle Cell      | Mgat5b        | MG | ENSMUSG00000043857  | ENSMUST00000103027 | NON_SYNONYMOUS_CODING | 2561            | 650                | L/V      | chr11      | 116846213 | C   | G   | TOLERATED     | 1            | 4.32        | benign            | 0.087               |
| 323-p3    | Spindle Cell      | Mgst1         | MG | ENSMUSG00000008540  | ENSMUST00000118091 | NON_SYNONYMOUS_CODING | 206             | 34                 | R/G      | chr6       | 138090312 | A   | G   | Not Scored    | -            | -           | unknown           | -                   |
| 323-p3    | Spindle Cell      | Mgst1         | MG | ENSMUSG00000008540  | ENSMUST00000118091 | NON_SYNONYMOUS_CODING | 296             | 64                 | G/S      | chr6       | 138090402 | G   | A   | DELETTERIOUS  | 0.03         | 4.32        | benign            | 1.35                |
| 323-p3    | Spindle Cell      | Mid1          | MG | ENSMUSG00000035299  | ENSMUST00000112104 | NON_SYNONYMOUS_CODING | 2109            | 627                | S/A      | chrX       | 166426979 | T   | G   | TOLERATED     | 0.22         | 2.83        | benign            | 0.167               |
| 323-p3    | Spindle Cell      | Nfrkb         | MG | ENSMUSG00000042185  | ENSMUST00000086167 | NON_SYNONYMOUS_CODING | 3357            | 1080               | K/N      | chr9       | 31222087  | A   | C   | TOLERATED     | 0.32         | 3.21        | benign            | 1.497               |
| 323-p3    | Spindle Cell      | Nid1          | MG | ENSMUSG00000005397  | ENSMUST00000005532 | NON_SYNONYMOUS_CODING | 249             | 80                 | G/S      | chr13      | 13556001  | G   | A   | DELETTERIOUS  | 0            | 2.89        | possibly damaging | 1.917               |
| 323-p3    | Spindle Cell      | Nipal2        | MG | ENSMUSG00000038879  | ENSMUST00000040791 | NON_SYNONYMOUS_CODING | 1395            | 292                | I/F      | chr15      | 34512482  | T   | A   | DELETTERIOUS  | 0.04         | 2.81        | possibly damaging | 1.523               |
| 323-p3    | Spindle Cell      | Nlrp1a        | MG | ENSMUSG00000069830  | ENSMUST00000108519 | NON_SYNONYMOUS_CODING | 4041            | 1248               | S/A      | chr11      | 70905899  | A   | C   | TOLERATED     | 1            | 3.64        | benign            | 0.435               |
| 323-p3    | Spindle Cell      | Nlrp2         | MG | ENSMUSG00000001520  | ENSMUST00000120405 | NON_SYNONYMOUS_CODING | 615             | 158                | P/S      | chr6       | 128357421 | C   | T   | TOLERATED     | 0.2          | 3.09        | benign            | 0.739               |
| 323-p3    | Spindle Cell      | Ocm           | MG | ENSMUSG00000029618  | ENSMUST00000085704 | NON_SYNONYMOUS_CODING | 250             | 41                 | A/P      | chr5       | 144785370 | C   | G   | TOLERATED     | 0.16         | 3.35        | benign            | 0.436               |
| 323-p3    | Spindle Cell      | Ocr1          | MG | ENSMUSG00000001173  | ENSMUST00000001202 | NON_SYNONYMOUS_CODING | 1561            | 432                | S/T      | chrX       | 45291529  | C   | G   | TOLERATED     | 0.3          | 2.87        | benign            | 0.171               |
| 323-p3    | Spindle Cell      | Odz1          | MG | ENSMUSG00000016150  | ENSMUST00000115059 | NON_SYNONYMOUS_CODING | 7913            | 2610               | T/I      | chrX       | 39886009  | G   | A   | DELETTERIOUS  | 0            | 3.05        | probably damaging | 2.098               |
| 323-p3    | Spindle Cell      | Palm2         | MG | ENSMUSG00000090053  | ENSMUST00000102905 | NON_SYNONYMOUS_CODING | 474             | 55                 | V/I      | chr4       | 57660898  | G   | A   | TOLERATED     | 0.59         | 2.86        | benign            | 0.461               |
| 323-p3    | Spindle Cell      | Pde3a         | MG | ENSMUSG00000041741  | ENSMUST00000043259 | NON_SYNONYMOUS_CODING | 1159            | 387                | I/F      | chr6       | 141407730 | A   | T   | TOLERATED     | 0.07         | 3.03        | benign            | 1.394               |

**Supplementary Table 3. Predicted somatic mutations in tumors**

| Sample Id | Histological type | GeneName | DB  | Gene               | Transcript          | Consequence           | Amino_a           |                      |          |       | Position  | Ref | Var | Effect (SIFT) | Median     |              |                   | Score (Polyphen) |
|-----------|-------------------|----------|-----|--------------------|---------------------|-----------------------|-------------------|----------------------|----------|-------|-----------|-----|-----|---------------|------------|--------------|-------------------|------------------|
|           |                   |          |     |                    |                     |                       | Position_i n_cDNA | Position_i n_protein | cid_chan | me    |           |     |     |               | Chromosome | Score (SIFT) | Info (SIFT)       |                  |
| 323-p3    | Spindle Cell      | Pick1    | MGI | ENSMUSG00000068206 | ENSMUST00000053926  | NON_SYNONYMOUS_CODING | 1600              | 461                  | R/K      | chr15 | 79086314  | G   | A   | DELETERIOUS   | 0.01       | 4.32         | unknown           | -                |
| 323-p3    | Spindle Cell      | Plod3    | MGI | ENSMUSG00000004846 | ENSMUST00000004968  | NON_SYNONYMOUS_CODING | 2760              | 698                  | R/H      | chr5  | 137471998 | G   | A   | DELETERIOUS   | 0          | 2.99         | probably damaging | 2.455            |
| 323-p3    | Spindle Cell      | Ppfbp1   | MGI | ENSMUSG00000016487 | ENSMUST00000011623  | NON_SYNONYMOUS_CODING | 1326              | 371                  | L/P      | chr6  | 146954499 | T   | C   | TOLERATED     | 0.3        | 2.99         | benign            | 0.114            |
| 323-p3    | Spindle Cell      | Prmp5    | MGI | ENSMUSG00000052262 | ENSMUST000000048686 | NON_SYNONYMOUS_CODING | 581               | 185                  | Q/K      | chr6  | 132262325 | G   | T   | TOLERATED     | 0.36       | 2.86         | unknown           | -                |
| 323-p3    | Spindle Cell      | Ptpm     | MGI | ENSMUSG00000033278 | ENSMUST000000112708 | NON_SYNONYMOUS_CODING | 315               | 89                   | T/N      | chr17 | 67703413  | G   | T   | -             | -          | -            | -                 |                  |
| 323-p3    | Spindle Cell      | Sectm1b  | MGI | ENSMUSG00000039364 | ENSMUST00000039309  | NON_SYNONYMOUS_CODING | 579               | 116                  | W/C      | chr11 | 120917034 | C   | G   | TOLERATED     | 0.05       | 3.36         | probably damaging | 2.734            |
| 323-p3    | Spindle Cell      | Sectm1b  | MGI | ENSMUSG00000039364 | ENSMUST00000039309  | NON_SYNONYMOUS_CODING | 571               | 114                  | E/K      | chr11 | 120917042 | C   | T   | TOLERATED     | 0.83       | 3.36         | benign            | 1.311            |
| 323-p3    | Spindle Cell      | Sico1c1  | MGI | ENSMUSG00000030235 | ENSMUST000000111837 | NON_SYNONYMOUS_CODING | 1309              | 311                  | N/D      | chr6  | 141495341 | A   | G   | TOLERATED     | 0.94       | 2.81         | benign            | 0.53             |
| 323-p3    | Spindle Cell      | Spna1    | MGI | ENSMUSG00000026532 | ENSMUST00000027817  | NON_SYNONYMOUS_CODING | 2984              | 940                  | E/G      | chr1  | 176133403 | A   | G   | DELETERIOUS   | 0.01       | 2.91         | probably damaging | 2.422            |
| 323-p3    | Spindle Cell      | Spnb4    | MGI | ENSMUSG00000011751 | ENSMUST00000011895  | NON_SYNONYMOUS_CODING | 4222              | 1357                 | E/G      | chr7  | 28179190  | T   | C   | TOLERATED     | 0.06       | 2.88         | possibly damaging | 1.627            |
| 323-p3    | Spindle Cell      | Tas2r134 | MGI | ENSMUSG00000056115 | ENSMUST00000070028  | NON_SYNONYMOUS_CODING | 149               | 50                   | C/F      | chr2  | 51483179  | G   | T   | DELETERIOUS   | 0.02       | 2.85         | probably damaging | 3.131            |
| 323-p3    | Spindle Cell      | Tex19.2  | MGI | ENSMUSG00000039337 | ENSMUST00000039146  | NON_SYNONYMOUS_CODING | 1582              | 314                  | D/E      | chr11 | 120977993 | A   | C   | Not Scored    | -          | -            | benign            | 0.675            |
| 323-p3    | Spindle Cell      | Timm9    | MGI | ENSMUSG00000021079 | ENSMUST00000021486  | NON_SYNONYMOUS_CODING | 412               | 89                   | R/W      | chr12 | 72224544  | G   | A   | DELETERIOUS   | 0          | 4.32         | probably damaging | 2.257            |
| 323-p3    | Spindle Cell      | Tmem67   | MGI | ENSMUSG00000049488 | ENSMUST00000108293  | NON_SYNONYMOUS_CODING | 669               | 26                   | Q/P      | chr4  | 12016499  | T   | G   | Not Scored    | -          | -            | benign            | 1.35             |
| 323-p3    | Spindle Cell      | Tpm2     | MGI | ENSMUSG00000028464 | ENSMUST00000034926  | NON_SYNONYMOUS_CODING | 907               | 266                  | I/T      | chr4  | 43531717  | A   | G   | TOLERATED     | 1          | 4.32         | unknown           | -                |
| 323-p3    | Spindle Cell      | Trp53    | MGI | ENSMUSG00000059552 | ENSMUST000000108658 | NON_SYNONYMOUS_CODING | 862               | 245                  | R/H      | chr11 | 69402713  | G   | A   | DELETERIOUS   | 0          | 2.77         | probably damaging | 2.45             |
| 323-p3    | Spindle Cell      | Tubb3    | MGI | ENSMUSG00000062380 | ENSMUST00000071134  | NON_SYNONYMOUS_CODING | 1009              | 276                  | R/Q      | chr8  | 125945056 | G   | A   | DELETERIOUS   | 0          | 4.2          | probably damaging | 1.773            |
| 323-p3    | Spindle Cell      | Vwf      | MGI | ENSMUSG00000001930 | ENSMUST000000112254 | NON_SYNONYMOUS_CODING | 7183              | 2314                 | R/C      | chr6  | 125613551 | C   | T   | TOLERATED     | 0.07       | 3.04         | probably damaging | 2.654            |
| 323-p3    | Spindle Cell      | Vwtr1    | MGI | ENSMUSG00000027803 | ENSMUST000000120977 | NON_SYNONYMOUS_CODING | 976               | 316                  | A/S      | chr3  | 57267480  | C   | A   | DELETERIOUS   | 0.02       | 3.12         | benign            | 1.259            |
| 323-p3    | Spindle Cell      | Zdthc4   | MGI | ENSMUSG00000001844 | ENSMUST00000001900  | NON_SYNONYMOUS_CODING | 1178              | 300                  | R/H      | chr5  | 144078354 | C   | T   | TOLERATED     | 0.98       | 2.88         | benign            | 0.867            |
| 323-p3    | Spindle Cell      | Zfp217   | MGI | ENSMUSG00000052056 | ENSMUST000000109155 | NON_SYNONYMOUS_CODING | 1927              | 473                  | P/H      | chr2  | 169941728 | G   | T   | TOLERATED     | 0.38       | 2.99         | benign            | 0.894            |
| 323-p3    | Spindle Cell      | Zkscan16 | MGI | ENSMUSG00000038630 | ENSMUST000000107554 | NON_SYNONYMOUS_CODING | 166               | 3                    | G/A      | chr4  | 58959006  | G   | C   | TOLERATED     | 1          | 4.32         | benign            | 0.039            |

## Supplementary Table 4. Regions showing copy number alterations in the tumor genome

| Sample | Histological type | segment | segment_mean_ | gene_id            | chromoso | gene_start | gene_end  | gene_symbol        |
|--------|-------------------|---------|---------------|--------------------|----------|------------|-----------|--------------------|
|        |                   | _id     | ratio         |                    | me       |            |           |                    |
| T155   | Adenocarcinoma    | 1       | -0.5832       | ENSMUSG00000038209 | 1        | 173354798  | 173371968 | Itln1              |
| T155   | Adenocarcinoma    | 1       | -0.5832       | ENSMUSG00000004709 | 1        | 173395868  | 173420260 | Cd244              |
| T155   | Adenocarcinoma    | 2       | 0.6253        | ENSMUSG00000044138 | 3        | 15348525   | 15551793  | Sirpb1             |
| T155   | Adenocarcinoma    | 2       | 0.6253        | ENSMUSG00000074677 | 3        | 15987305   | 16040598  | Sirpb1             |
| T155   | Adenocarcinoma    | 3       | 0.8945        | ENSMUSG00000049214 | 4        | 111470967  | 111481052 | NP_808486.1        |
| T155   | Adenocarcinoma    | 3       | 0.8945        | ENSMUSG00000055960 | 4        | 111570571  | 111665328 | NP_848901.1        |
| T155   | Adenocarcinoma    | 3       | 0.8945        | ENSMUSG00000070868 | 4        | 111733673  | 111796139 | A430090E18Rik      |
| T155   | Adenocarcinoma    | 3       | 0.8945        | ENSMUSG00000049972 | 4        | 111883901  | 111931917 | NP_808532.1        |
| T155   | Adenocarcinoma    | 3       | 0.8945        | ENSMUSG00000034359 | 4        | 112055126  | 112145772 | OTTMUSG00000008540 |
| T155   | Adenocarcinoma    | 3       | 0.8945        | ENSMUSG00000065318 | 4        | 112088704  | 112088810 | U6                 |
| T155   | Adenocarcinoma    | 4       | 0.7608        | ENSMUSG00000060264 | 4        | 112453007  | 112454218 |                    |
| T155   | Adenocarcinoma    | 4       | 0.7608        | ENSMUSG00000051602 | 4        | 112476241  | 112477763 |                    |
| T155   | Adenocarcinoma    | 5       | -0.6526       | ENSMUSG00000066613 | 5        | 110247339  | 110250320 | 2310001H12Rik      |
| T155   | Adenocarcinoma    | 6       | -0.5371       | ENSMUSG00000075297 | 10       | 21972889   | 21976663  |                    |
| T155   | Adenocarcinoma    | 7       | -0.9625       | ENSMUSG00000070390 | 11       | 70988256   | 71034514  |                    |
| T155   | Adenocarcinoma    | 7       | -0.9625       | ENSMUSG00000077340 | 11       | 71050002   | 71050135  | SNORA17            |
| T155   | Adenocarcinoma    | 7       | -0.9625       | ENSMUSG00000040575 | 11       | 71058625   | 71101427  | Nlrp1c             |
| T155   | Adenocarcinoma    | 7       | -0.9625       | ENSMUSG00000077632 | 11       | 71104620   | 71104753  | SNORA17            |
| T155   | Adenocarcinoma    | 8       | -0.5924       | ENSMUSG00000047632 | 19       | 36982690   | 36984743  | Fgfbp3             |
| T155   | Adenocarcinoma    | 9       | -0.6396       | ENSMUSG00000056999 | 19       | 37335574   | 37395757  | Ide                |
| T358   | Adenocarcinoma    | 1       | -0.5663       | ENSMUSG00000038218 | 1        | 173351908  | 173353597 |                    |
| T358   | Adenocarcinoma    | 1       | -0.5663       | ENSMUSG00000038209 | 1        | 173354798  | 173371968 | Itln1              |
| T358   | Adenocarcinoma    | 1       | -0.5663       | ENSMUSG00000004709 | 1        | 173395868  | 173420260 | Cd244              |
| T358   | Adenocarcinoma    | 2       | 0.8014        | ENSMUSG00000055960 | 4        | 111570571  | 111665328 | NP_848901.1        |
| T358   | Adenocarcinoma    | 2       | 0.8014        | ENSMUSG00000070868 | 4        | 111733673  | 111796139 | A430090E18Rik      |
| T358   | Adenocarcinoma    | 2       | 0.8014        | ENSMUSG00000049972 | 4        | 111883901  | 111931917 | NP_808532.1        |
| T358   | Adenocarcinoma    | 2       | 0.8014        | ENSMUSG00000034359 | 4        | 112055126  | 112145772 | OTTMUSG00000008540 |
| T358   | Adenocarcinoma    | 2       | 0.8014        | ENSMUSG00000065318 | 4        | 112088704  | 112088810 | U6                 |
| T358   | Adenocarcinoma    | 3       | 0.5772        | ENSMUSG00000048766 | 4        | 112209079  | 112272798 | A030001H23Rik      |
| T358   | Adenocarcinoma    | 3       | 0.5772        | ENSMUSG00000060264 | 4        | 112453007  | 112454218 |                    |
| T358   | Adenocarcinoma    | 3       | 0.5772        | ENSMUSG00000051602 | 4        | 112476241  | 112477763 |                    |
| T358   | Adenocarcinoma    | 4       | -0.7548       | ENSMUSG00000076466 | 6        | 41043174   | 41043674  | TRBV12-1           |
| T358   | Adenocarcinoma    | 4       | -0.7548       | ENSMUSG00000076467 | 6        | 41045643   | 41046075  | TRBV13-1           |
| T358   | Adenocarcinoma    | 4       | -0.7548       | ENSMUSG00000076468 | 6        | 41048471   | 41048971  | TRBV12-2           |
| T358   | Adenocarcinoma    | 4       | -0.7548       | ENSMUSG00000076469 | 6        | 41051003   | 41051439  | TRBV13-2           |

## Supplementary Table 4. Regions showing copy number alterations in the tumor genome

| Sample | Histological type | segment_id | segment_mean_ratio | gene_id            | chromosome | gene_start | gene_end | gene_symbol        |
|--------|-------------------|------------|--------------------|--------------------|------------|------------|----------|--------------------|
| T358   | Adenocarcinoma    | 4          | -0.7548            | ENSMUSG00000076470 | 6          | 41059754   | 41060192 | TRBV13-3           |
| T358   | Adenocarcinoma    | 4          | -0.7548            | ENSMUSG00000076471 | 6          | 41064774   | 41065223 | TRBV14             |
| T358   | Adenocarcinoma    | 4          | -0.7548            | ENSMUSG00000076472 | 6          | 41070818   | 41071265 | TRBV15             |
| T358   | Adenocarcinoma    | 4          | -0.7548            | ENSMUSG00000076473 | 6          | 41081398   | 41081837 | TRBV16             |
| T358   | Adenocarcinoma    | 5          | 0.4481             | ENSMUSG00000049556 | 9          | 56416612   | 56483390 | Lingo1             |
| T358   | Adenocarcinoma    | 5          | 0.4481             | ENSMUSG00000045620 | 9          | 56646796   | 56650100 | Odf3l1             |
| T358   | Adenocarcinoma    | 5          | 0.4481             | ENSMUSG00000032911 | 9          | 56663297   | 56697272 | Cspg4              |
| T358   | Adenocarcinoma    | 6          | 0.4608             | ENSMUSG00000034248 | 14         | 68195176   | 68238400 | Slc25a37           |
| T358   | Adenocarcinoma    | 6          | 0.4608             | ENSMUSG00000047977 | 14         | 68243712   | 68247629 | D930020E02Rik      |
| T358   | Adenocarcinoma    | 6          | 0.4608             | ENSMUSG00000022066 | 14         | 68290504   | 68320600 | Entpd4             |
| T358   | Adenocarcinoma    | 6          | 0.4608             | ENSMUSG00000071316 | 14         | 68343957   | 68344433 | ENSMUSG00000071316 |
| T358   | Adenocarcinoma    | 6          | 0.4608             | ENSMUSG00000034205 | 14         | 68344248   | 68428800 | Loxl2              |
| T358   | Adenocarcinoma    | 6          | 0.4608             | ENSMUSG00000056640 | 14         | 68393255   | 68393578 | ENSMUSG00000056640 |
| T358   | Adenocarcinoma    | 7          | -0.4542            | ENSMUSG00000050982 | 15         | 77304302   | 77318324 | 9030421J09Rik      |
| T358   | Adenocarcinoma    | 7          | -0.4542            | ENSMUSG00000044309 | 15         | 77352890   | 77357382 | 2210421G13Rik      |
| T358   | Adenocarcinoma    | 8          | 0.5567             | ENSMUSG00000054939 | 16         | 3762541    | 3770034  | NP_001074686.1     |
| T358   | Adenocarcinoma    | 8          | 0.5567             | ENSMUSG00000039789 | 16         | 3776772    | 3787602  | Zfp597             |
| T358   | Adenocarcinoma    | 8          | 0.5567             | ENSMUSG00000005982 | 16         | 3799911    | 3817167  | 1200013P24Rik      |
| T358   | Adenocarcinoma    | 8          | 0.5567             | ENSMUSG00000005983 | 16         | 3810409    | 3822985  | 1700037C18Rik      |
| T358   | Adenocarcinoma    | 8          | 0.5567             | ENSMUSG00000071682 | 16         | 3824085    | 3824420  | 1700016D08Rik      |
| T358   | Adenocarcinoma    | 8          | 0.5567             | ENSMUSG00000014232 | 16         | 3824237    | 3856375  | Cluap1             |
| T358   | Adenocarcinoma    | 8          | 0.5567             | ENSMUSG00000049871 | 16         | 3860838    | 3891773  | Nlrc3              |
| T358   | Adenocarcinoma    | 8          | 0.5567             | ENSMUSG00000039738 | 16         | 3895049    | 3914580  | Btbd12             |
| T358   | Adenocarcinoma    | 8          | 0.5567             | ENSMUSG00000005980 | 16         | 3952371    | 3955247  | Dnase1             |
| T358   | Adenocarcinoma    | 8          | 0.5567             | ENSMUSG00000005981 | 16         | 3955205    | 3993038  | Trap1              |
| T358   | Adenocarcinoma    | 8          | 0.5567             | ENSMUSG00000075417 | 16         | 3997429    | 3997761  | Crebbp             |
| T358   | Adenocarcinoma    | 8          | 0.5567             | ENSMUSG00000022521 | 16         | 3999276    | 4128632  | Crebbp             |
| T358   | Adenocarcinoma    | 9          | 0.6909             | ENSMUSG00000022542 | 16         | 4902179    | 4913173  | SEPT12             |
| T358   | Adenocarcinoma    | 9          | 0.6909             | ENSMUSG00000022540 | 16         | 4924050    | 4928848  | Rogdi              |
| T358   | Adenocarcinoma    | 9          | 0.6909             | ENSMUSG00000022536 | 16         | 4929258    | 4965181  | 3930401K13Rik      |
| T358   | Adenocarcinoma    | 9          | 0.6909             | ENSMUSG00000039473 | 16         | 4970410    | 5001610  | Ubn1               |
| T358   | Adenocarcinoma    | 9          | 0.6909             | ENSMUSG00000077367 | 16         | 4976096    | 4976203  | U6                 |
| T358   | Adenocarcinoma    | 9          | 0.6909             | ENSMUSG00000039457 | 16         | 5002046    | 5047742  | Ppl                |
| T358   | Adenocarcinoma    | 10         | 0.963              | ENSMUSG00000008658 | 16         | 6985156    | 7325300  | A2bp1              |
| T358   | Adenocarcinoma    | 11         | 0.6974             | ENSMUSG00000077152 | 16         | 8318135    | 8318266  | SNORA17            |

## Supplementary Table 4. Regions showing copy number alterations in the tumor genome

| Sample | Histological type | segment_id | segment_mean_ratio | gene_id            | chromosome | gene_start | gene_end | gene_symbol        |
|--------|-------------------|------------|--------------------|--------------------|------------|------------|----------|--------------------|
| T358   | Adenocarcinoma    | 11         | 0.6974             | ENSMUSG00000022715 | 16         | 8324597    | 8340457  | 4930511J11Rik      |
| T358   | Adenocarcinoma    | 11         | 0.6974             | ENSMUSG00000039345 | 16         | 8386134    | 8405518  | BC024814           |
| T358   | Adenocarcinoma    | 11         | 0.6974             | ENSMUSG00000077557 | 16         | 8395981    | 8396062  | SNORD86            |
| T358   | Adenocarcinoma    | 11         | 0.6974             | ENSMUSG00000057880 | 16         | 8428810    | 8536889  | Abat               |
| T358   | Adenocarcinoma    | 11         | 0.6974             | ENSMUSG00000051226 | 16         | 8536068    | 8536460  | ENSMUSG00000051226 |
| T358   | Adenocarcinoma    | 11         | 0.6974             | ENSMUSG00000076039 | 16         | 8538484    | 8538591  |                    |
| T358   | Adenocarcinoma    | 11         | 0.6974             | ENSMUSG00000052361 | 16         | 8538504    | 8540640  |                    |
| T358   | Adenocarcinoma    | 11         | 0.6974             | ENSMUSG00000043140 | 16         | 8549205    | 8553032  | Tmem186            |
| T358   | Adenocarcinoma    | 11         | 0.6974             | ENSMUSG00000022711 | 16         | 8553047    | 8572870  | Pmm2               |
| T358   | Adenocarcinoma    | 11         | 0.6974             | ENSMUSG00000008393 | 16         | 8573908    | 8587474  | Carhsp1            |
| T358   | Adenocarcinoma    | 11         | 0.6974             | ENSMUSG00000022710 | 16         | 8606101    | 8672887  | Q6A4J8-2           |
| T358   | Adenocarcinoma    | 11         | 0.6974             | ENSMUSG00000065902 | 16         | 8682039    | 8682146  | U6                 |
| T358   | Adenocarcinoma    | 11         | 0.6974             | ENSMUSG00000022507 | 16         | 8745971    | 8772066  | 1810013L24Rik      |
| T358   | Adenocarcinoma    | 11         | 0.6974             | ENSMUSG00000068674 | 16         | 8835612    | 8835944  |                    |
| T358   | Adenocarcinoma    | 12         | 0.4552             | ENSMUSG00000059003 | 16         | 9491382    | 9906111  | Grin2a             |
| T358   | Adenocarcinoma    | 12         | 0.4552             | ENSMUSG00000056779 | 16         | 9958539    | 9959308  |                    |
| T358   | Adenocarcinoma    | 12         | 0.4552             | ENSMUSG00000039209 | 16         | 10083806   | 10088489 | Rpl39l             |
| T358   | Adenocarcinoma    | 12         | 0.4552             | ENSMUSG00000039200 | 16         | 10106500   | 10155534 | Atf7ip2            |
| T358   | Adenocarcinoma    | 12         | 0.4552             | ENSMUSG00000075406 | 16         | 10155598   | 10156629 | Atf7ip2            |
| T358   | Adenocarcinoma    | 13         | 0.9408             | ENSMUSG00000022505 | 16         | 10195337   | 10227546 | Emp2               |
| T358   | Adenocarcinoma    | 13         | 0.9408             | ENSMUSG00000039179 | 16         | 10271531   | 10308997 | Tekt5              |
| T358   | Adenocarcinoma    | 13         | 0.9408             | ENSMUSG00000022503 | 16         | 10325526   | 10337996 | Nubp1              |
| T358   | Adenocarcinoma    | 13         | 0.9408             | ENSMUSG00000050908 | 16         | 10337777   | 10360623 | BC068110           |
| T358   | Adenocarcinoma    | 13         | 0.9408             | ENSMUSG00000022504 | 16         | 10393637   | 10441141 | Ciita              |
| T358   | Adenocarcinoma    | 13         | 0.9408             | ENSMUSG00000075404 | 16         | 10403400   | 10404635 | EG669998           |
| T358   | Adenocarcinoma    | 13         | 0.9408             | ENSMUSG00000038055 | 16         | 10443793   | 10456632 | Dexi               |
| T358   | Adenocarcinoma    | 13         | 0.9408             | ENSMUSG00000068663 | 16         | 10458965   | 10658449 | 4932416N17Rik      |
| T358   | Adenocarcinoma    | 14         | 0.6053             | ENSMUSG00000068663 | 16         | 10458965   | 10658449 | 4932416N17Rik      |
| T358   | Adenocarcinoma    | 14         | 0.6053             | ENSMUSG00000038037 | 16         | 10695821   | 10699114 | Socs1              |
| T358   | Adenocarcinoma    | 14         | 0.6053             | ENSMUSG00000043050 | 16         | 10701514   | 10702238 | Tnp2               |
| T358   | Adenocarcinoma    | 14         | 0.6053             | ENSMUSG00000050058 | 16         | 10704162   | 10704467 | Prm3               |
| T358   | Adenocarcinoma    | 14         | 0.6053             | ENSMUSG00000038015 | 16         | 10704961   | 10705683 | Prm2               |
| T358   | Adenocarcinoma    | 14         | 0.6053             | ENSMUSG00000022501 | 16         | 10709905   | 10710404 | Prm1               |
| T358   | Adenocarcinoma    | 14         | 0.6053             | ENSMUSG00000071671 | 16         | 10714953   | 10715294 |                    |
| T358   | Adenocarcinoma    | 14         | 0.6053             | ENSMUSG00000037991 | 16         | 10748668   | 10799812 | A630055G03Rik      |

## Supplementary Table 4. Regions showing copy number alterations in the tumor genome

| Sample | Histological type | segment_id | segment_mean_ratio | gene_id            | chromosome | gene_start | gene_end | gene_symbol        |
|--------|-------------------|------------|--------------------|--------------------|------------|------------|----------|--------------------|
| T358   | Adenocarcinoma    | 14         | 0.6053             | ENSMUSG00000022500 | 16         | 10872437   | 10906698 | Litaf              |
| T358   | Adenocarcinoma    | 14         | 0.6053             | ENSMUSG00000075403 | 16         | 10949524   | 10949943 | ENSMUSG00000075403 |
| T358   | Adenocarcinoma    | 14         | 0.6053             | ENSMUSG00000051848 | 16         | 10973670   | 10979700 | ENSMUSG00000051848 |
| T358   | Adenocarcinoma    | 14         | 0.6053             | ENSMUSG00000037972 | 16         | 10974523   | 10988561 | Snn                |
| T358   | Adenocarcinoma    | 14         | 0.6053             | ENSMUSG00000022498 | 16         | 10988489   | 11048110 | Txndc11            |
| T358   | Adenocarcinoma    | 14         | 0.6053             | ENSMUSG00000037965 | 16         | 11050181   | 11089867 | Zc3h7a             |
| T358   | Adenocarcinoma    | 14         | 0.6053             | ENSMUSG00000076258 | 16         | 11057618   | 11057726 | mmu-mir-689-2      |
| T358   | Adenocarcinoma    | 14         | 0.6053             | ENSMUSG00000064565 | 16         | 11080683   | 11080845 | U1                 |
| T358   | Adenocarcinoma    | 14         | 0.6053             | ENSMUSG00000005846 | 16         | 11106615   | 11116872 | Rsl1d1             |
| T358   | Adenocarcinoma    | 14         | 0.6053             | ENSMUSG00000062203 | 16         | 11133733   | 11167787 | Gspt1              |
| T358   | Adenocarcinoma    | 14         | 0.6053             | ENSMUSG00000022496 | 16         | 11227390   | 11233650 | Tnfrsf17           |
| T358   | Adenocarcinoma    | 15         | 1.0013             | ENSMUSG00000071669 | 16         | 11319226   | 11669050 | 4933437K13Rik      |
| T358   | Adenocarcinoma    | 16         | 0.6367             | ENSMUSG00000071669 | 16         | 11319226   | 11669050 | 4933437K13Rik      |
| T358   | Adenocarcinoma    | 16         | 0.6367             | ENSMUSG00000065979 | 16         | 11717299   | 11823023 | C530044N13Rik      |
| T358   | Adenocarcinoma    | 16         | 0.6367             | ENSMUSG00000055015 | 16         | 11814942   | 11844172 | ENSMUSG00000055015 |
| T358   | Adenocarcinoma    | 16         | 0.6367             | ENSMUSG00000022494 | 16         | 11898036   | 11898722 | 2700045P11Rik      |
| T358   | Adenocarcinoma    | 17         | 0.5849             | ENSMUSG00000069321 | 16         | 12864339   | 12865033 | XR_003024.1        |
| T358   | Adenocarcinoma    | 17         | 0.5849             | ENSMUSG00000022545 | 16         | 13023314   | 13062312 | Ercc4              |
| T358   | Adenocarcinoma    | 17         | 0.5849             | ENSMUSG00000053458 | 16         | 13239996   | 13246499 | Gt4-1              |
| T358   | Adenocarcinoma    | 17         | 0.5849             | ENSMUSG00000009569 | 16         | 13272217   | 13326281 | Mkl2               |
| T358   | Adenocarcinoma    | 17         | 0.5849             | ENSMUSG00000075401 | 16         | 13329075   | 13329467 | ENSMUSG00000075401 |
| T358   | Adenocarcinoma    | 17         | 0.5849             | ENSMUSG00000076972 | 16         | 13363098   | 13363180 |                    |
| T358   | Adenocarcinoma    | 17         | 0.5849             | ENSMUSG00000065449 | 16         | 13367418   | 13367504 | mmu-mir-365-1      |
| T358   | Adenocarcinoma    | 17         | 0.5849             | ENSMUSG00000075400 | 16         | 13429804   | 13432863 | 2310015D24Rik      |
| T358   | Adenocarcinoma    | 17         | 0.5849             | ENSMUSG00000077488 | 16         | 13445006   | 13445129 | SNORA17            |
| T358   | Adenocarcinoma    | 17         | 0.5849             | ENSMUSG00000022685 | 16         | 13452428   | 13581193 | Parn               |
| T358   | Adenocarcinoma    | 17         | 0.5849             | ENSMUSG00000022684 | 16         | 13585566   | 13617180 | 3110001I22Rik      |
| T358   | Adenocarcinoma    | 17         | 0.5849             | ENSMUSG00000022683 | 16         | 13628640   | 13644163 | Pla2g10            |
| T358   | Adenocarcinoma    | 18         | 0.5492             | ENSMUSG00000022682 | 16         | 13694277   | 13728419 | Rrn3               |
| T358   | Adenocarcinoma    | 18         | 0.5492             | ENSMUSG00000022681 | 16         | 13732855   | 13749028 | Ntan1              |
| T358   | Adenocarcinoma    | 18         | 0.5492             | ENSMUSG00000022680 | 16         | 13748392   | 13801348 | Pdxdc1             |
| T358   | Adenocarcinoma    | 18         | 0.5492             | ENSMUSG00000022679 | 16         | 13854273   | 13862956 | Mpv17l             |
| T358   | Adenocarcinoma    | 18         | 0.5492             | ENSMUSG00000065968 | 16         | 13895549   | 13897387 | EG665536           |
| T358   | Adenocarcinoma    | 18         | 0.5492             | ENSMUSG00000044117 | 16         | 13900184   | 14014886 | 2900011O08Rik      |
| T358   | Adenocarcinoma    | 19         | 0.4026             | ENSMUSG00000026181 | 16         | 16816884   | 16840925 | Ppm1f              |



## Supplementary Table 4. Regions showing copy number alterations in the tumor genome

| Sample | Histological type | segment | segment_mean_ | gene_id            | chromoso | gene_start | gene_end | gene_symbol   |
|--------|-------------------|---------|---------------|--------------------|----------|------------|----------|---------------|
|        |                   | _id     | ratio         |                    | me       |            |          |               |
| T358   | Adenocarcinoma    | 19      | 0.4026        | ENSMUSG00000060383 | 16       | 16882172   | 16882634 | XR_003211.1   |
| T358   | Adenocarcinoma    | 19      | 0.4026        | ENSMUSG00000063358 | 16       | 16896945   | 16961016 | Mapk1         |
| T358   | Adenocarcinoma    | 19      | 0.4026        | ENSMUSG00000022773 | 16       | 16983786   | 17000251 | Ypel1         |
| T358   | Adenocarcinoma    | 19      | 0.4026        | ENSMUSG00000055497 | 16       | 16995561   | 16996254 |               |
| T358   | Adenocarcinoma    | 19      | 0.4026        | ENSMUSG00000022771 | 16       | 17000121   | 17024795 | Ppil2         |
| T358   | Adenocarcinoma    | 19      | 0.4026        | ENSMUSG00000049916 | 16       | 17026961   | 17038669 | 2610318N02Rik |
| T358   | Adenocarcinoma    | 19      | 0.4026        | ENSMUSG00000065572 | 16       | 17037624   | 17037705 | mmu-mir-130b  |
| T358   | Adenocarcinoma    | 19      | 0.4026        | ENSMUSG00000076288 | 16       | 17037963   | 17038059 | mmu-mir-301b  |
| T358   | Adenocarcinoma    | 19      | 0.4026        | ENSMUSG00000022769 | 16       | 17043701   | 17045928 | Sdf2l1        |
| T358   | Adenocarcinoma    | 19      | 0.4026        | ENSMUSG00000022768 | 16       | 17052627   | 17060792 | Ccdc116       |
| T358   | Adenocarcinoma    | 19      | 0.4026        | ENSMUSG00000041774 | 16       | 17060542   | 17062406 | 1810015A11Rik |
| T358   | Adenocarcinoma    | 19      | 0.4026        | ENSMUSG00000038965 | 16       | 17065576   | 17115055 | Ube2l3        |
| T358   | Adenocarcinoma    | 19      | 0.4026        | ENSMUSG00000065710 | 16       | 17119355   | 17119461 | U6            |
| T358   | Adenocarcinoma    | 19      | 0.4026        | ENSMUSG00000071636 | 16       | 17122548   | 17127484 | Gm603         |
| T358   | Adenocarcinoma    | 19      | 0.4026        | ENSMUSG00000050240 | 16       | 17147150   | 17176993 | Hic2          |
| T358   | Adenocarcinoma    | 19      | 0.4026        | ENSMUSG00000055692 | 16       | 17189905   | 17192223 | D16Bwg1494e   |
| T358   | Adenocarcinoma    | 19      | 0.4026        | ENSMUSG00000041720 | 16       | 17194132   | 17319877 | Pik4ca        |
| T358   | Adenocarcinoma    | 19      | 0.4026        | ENSMUSG00000022766 | 16       | 17244978   | 17257137 | Serpind1      |
| T358   | Adenocarcinoma    | 19      | 0.4026        | ENSMUSG00000065331 | 16       | 17255469   | 17255575 | U6            |
| T358   | Adenocarcinoma    | 19      | 0.4026        | ENSMUSG00000022765 | 16       | 17319595   | 17344389 | Snap29        |
| T358   | Adenocarcinoma    | 19      | 0.4026        | ENSMUSG00000006134 | 16       | 17365550   | 17399818 | Crkl          |
| T358   | Adenocarcinoma    | 19      | 0.4026        | ENSMUSG00000022763 | 16       | 17403254   | 17421046 | Aifm3         |
| T358   | Adenocarcinoma    | 19      | 0.4026        | ENSMUSG00000022761 | 16       | 17422531   | 17439894 | Lztr1         |
| T358   | Adenocarcinoma    | 19      | 0.4026        | ENSMUSG00000022760 | 16       | 17441542   | 17444420 | Thap7         |
| T358   | Adenocarcinoma    | 19      | 0.4026        | ENSMUSG00000022759 | 16       | 17459047   | 17474787 | 4930451C15Rik |
| T358   | Adenocarcinoma    | 19      | 0.4026        | ENSMUSG00000022758 | 16       | 17475572   | 17485574 | P2rxl1        |
| T358   | Adenocarcinoma    | 19      | 0.4026        | ENSMUSG00000022756 | 16       | 17485581   | 17490234 | Slc7a4        |
| T358   | Adenocarcinoma    | 19      | 0.4026        | ENSMUSG00000005899 | 16       | 17532920   | 17558391 | Smpd4         |
| T358   | Adenocarcinoma    | 19      | 0.4026        | ENSMUSG00000041617 | 16       | 17560181   | 17562978 | 2310015A05Rik |
| T358   | Adenocarcinoma    | 19      | 0.4026        | ENSMUSG00000012114 | 16       | 17564784   | 17636460 | Pcqap         |
| T358   | Adenocarcinoma    | 19      | 0.4026        | ENSMUSG00000022750 | 16       | 17673234   | 17706765 | Klhl22        |
| T358   | Adenocarcinoma    | 19      | 0.4026        | ENSMUSG00000012017 | 16       | 17710845   | 17721850 | Scarf2        |
| T358   | Adenocarcinoma    | 19      | 0.4026        | ENSMUSG00000053571 | 16       | 17746701   | 17748045 | B830017H08Rik |
| T358   | Adenocarcinoma    | 19      | 0.4026        | ENSMUSG00000003166 | 16       | 17748839   | 17805234 | Car15         |
| T358   | Adenocarcinoma    | 19      | 0.4026        | ENSMUSG00000041566 | 16       | 17807786   | 17811485 | Tssk1         |

## Supplementary Table 4. Regions showing copy number alterations in the tumor genome

| Sample | Histological type | segment | segment_mean_ | gene_id             | chromoso | gene_start | gene_end  | gene_symbol         |
|--------|-------------------|---------|---------------|---------------------|----------|------------|-----------|---------------------|
|        |                   | _id     | ratio         |                     | me       |            |           |                     |
| T358   | Adenocarcinoma    | 19      | 0.4026        | ENSMUSG00000045521  | 16       | 17812217   | 17813587  | Tssk2               |
| T358   | Adenocarcinoma    | 19      | 0.4026        | ENSMUSG00000003527  | 16       | 17815328   | 17824904  | Es2el               |
| T358   | Adenocarcinoma    | 19      | 0.4026        | ENSMUSG000000022738 | 16       | 17826677   | 17828566  | Gscl                |
| T358   | Adenocarcinoma    | 19      | 0.4026        | ENSMUSG000000003528 | 16       | 17838786   | 17841736  | Slc25a1             |
| T358   | Adenocarcinoma    | 19      | 0.4026        | ENSMUSG000000059280 | 16       | 17893989   | 17894836  | Vpreb2              |
| T358   | Adenocarcinoma    | 19      | 0.4026        | ENSMUSG000000075352 | 16       | 17942480   | 17942680  | AA066038            |
| T358   | Adenocarcinoma    | 19      | 0.4026        | ENSMUSG000000003531 | 16       | 17978722   | 17984926  | Dgcr6               |
| T358   | Adenocarcinoma    | 19      | 0.4026        | ENSMUSG000000003526 | 16       | 17985289   | 18002720  | Prodh               |
| T358   | Adenocarcinoma    | 19      | 0.4026        | ENSMUSG000000043811 | 16       | 18064294   | 18065694  | Rtn4r               |
| T358   | Adenocarcinoma    | 20      | 0.4338        | ENSMUSG000000041215 | 16       | 20054651   | 20146116  | Yeats2              |
| T358   | Adenocarcinoma    | 20      | 0.4338        | ENSMUSG000000041205 | 16       | 20148791   | 20154863  | Map6d1              |
| T358   | Adenocarcinoma    | 20      | 0.4338        | ENSMUSG000000033918 | 16       | 20193361   | 20215905  | Parl                |
| T358   | Adenocarcinoma    | 21      | 0.7767        | ENSMUSG000000022818 | 16       | 20221930   | 20236551  | EG224044            |
| T358   | Adenocarcinoma    | 21      | 0.7767        | ENSMUSG000000022822 | 16       | 20244846   | 20339937  | Abcc5               |
| T358   | Adenocarcinoma    | 21      | 0.7767        | ENSMUSG000000003235 | 16       | 20412360   | 20422866  | Eif2b5              |
| T358   | Adenocarcinoma    | 21      | 0.7767        | ENSMUSG000000003233 | 16       | 20430525   | 20445059  | Dvl3                |
| T358   | Adenocarcinoma    | 21      | 0.7767        | ENSMUSG000000022841 | 16       | 20449047   | 20457598  | Ap2m1               |
| T358   | Adenocarcinoma    | 21      | 0.7767        | ENSMUSG000000075326 | 16       | 20459458   | 20459742  | ENSMUSG000000075326 |
| T358   | Adenocarcinoma    | 21      | 0.7767        | ENSMUSG000000003234 | 16       | 20462183   | 20474922  | Abcf3               |
| T358   | Adenocarcinoma    | 21      | 0.7767        | ENSMUSG000000046613 | 16       | 20503633   | 20511997  | BC052055            |
| T358   | Adenocarcinoma    | 22      | 0.5713        | ENSMUSG000000068492 | 16       | 21066845   | 21067800  | NM_025634.2         |
| T358   | Adenocarcinoma    | 22      | 0.5713        | ENSMUSG000000005958 | 16       | 21118777   | 21137287  | Ephb3               |
| T594   | Adenocarcinoma    | 1       | -0.5548       | ENSMUSG000000038218 | 1        | 173351908  | 173353597 |                     |
| T594   | Adenocarcinoma    | 1       | -0.5548       | ENSMUSG000000038209 | 1        | 173354798  | 173371968 | Itln1               |
| T594   | Adenocarcinoma    | 1       | -0.5548       | ENSMUSG000000004709 | 1        | 173395868  | 173420260 | Cd244               |
| T594   | Adenocarcinoma    | 2       | 0.8814        | ENSMUSG000000055960 | 4        | 111570571  | 111665328 | NP_848901.1         |
| T594   | Adenocarcinoma    | 2       | 0.8814        | ENSMUSG000000070868 | 4        | 111733673  | 111796139 | A430090E18Rik       |
| T594   | Adenocarcinoma    | 2       | 0.8814        | ENSMUSG000000049972 | 4        | 111883901  | 111931917 | NP_808532.1         |
| T594   | Adenocarcinoma    | 2       | 0.8814        | ENSMUSG000000034359 | 4        | 112055126  | 112145772 | OTTMUSG000000008540 |
| T594   | Adenocarcinoma    | 2       | 0.8814        | ENSMUSG000000065318 | 4        | 112088704  | 112088810 | U6                  |
| T594   | Adenocarcinoma    | 3       | 0.4549        | ENSMUSG000000034359 | 4        | 112055126  | 112145772 | OTTMUSG000000008540 |
| T594   | Adenocarcinoma    | 3       | 0.4549        | ENSMUSG000000048766 | 4        | 112209079  | 112272798 | A030001H23Rik       |
| T594   | Adenocarcinoma    | 3       | 0.4549        | ENSMUSG000000060264 | 4        | 112453007  | 112454218 |                     |
| T594   | Adenocarcinoma    | 3       | 0.4549        | ENSMUSG000000051602 | 4        | 112476241  | 112477763 |                     |
| T594   | Adenocarcinoma    | 4       | -0.7677       | ENSMUSG000000060441 | 7        | 104139188  | 104161960 |                     |

## Supplementary Table 4. Regions showing copy number alterations in the tumor genome

| Sample | Histological type | segment | segment_mean_ | gene_id            | chromoso | gene_start | gene_end  | gene_symbol        |
|--------|-------------------|---------|---------------|--------------------|----------|------------|-----------|--------------------|
|        |                   | _id     | ratio         |                    | me       |            |           |                    |
| T594   | Adenocarcinoma    | 4       | -0.7677       | ENSMUSG00000066258 | 7        | 104173720  | 104189284 | Trim12             |
| T594   | Adenocarcinoma    | 5       | -0.7952       | ENSMUSG00000057596 | 7        | 104345663  | 104381646 | AI451617           |
| T594   | Adenocarcinoma    | 5       | -0.7952       | ENSMUSG00000073929 | 7        | 104406780  | 104409147 | EG625321           |
| T594   | Adenocarcinoma    | 6       | -0.5459       | ENSMUSG00000050982 | 15       | 77304302   | 77318324  | 9030421J09Rik      |
| T594   | Adenocarcinoma    | 6       | -0.5459       | ENSMUSG00000044309 | 15       | 77352890   | 77357382  | 2210421G13Rik      |
| T594   | Adenocarcinoma    | 7       | 0.5935        | ENSMUSG00000052133 | 16       | 35461109   | 35584353  | Sema5b             |
| T594   | Adenocarcinoma    | 8       | -0.9475       | ENSMUSG00000071562 | 16       | 36099373   | 36204610  | Stfa3              |
| T594   | Adenocarcinoma    | 8       | -0.9475       | ENSMUSG00000051949 | 16       | 36172285   | 36176611  | 2010005H15Rik      |
| T594   | Adenocarcinoma    | 9       | -0.8031       | ENSMUSG00000062082 | 16       | 44740228   | 44757396  | Cd200r4            |
| T594   | Adenocarcinoma    | 9       | -0.8031       | ENSMUSG00000057827 | 16       | 44786429   | 44835172  | Cd200r2            |
| T196   | Fibroadenoma      | 1       | -0.7114       | ENSMUSG00000038209 | 1        | 173354798  | 173371968 | Itln1              |
| T196   | Fibroadenoma      | 2       | 0.7634        | ENSMUSG00000055960 | 4        | 111570571  | 111665328 | NP_848901.1        |
| T196   | Fibroadenoma      | 2       | 0.7634        | ENSMUSG00000070868 | 4        | 111733673  | 111796139 | A430090E18Rik      |
| T196   | Fibroadenoma      | 2       | 0.7634        | ENSMUSG00000049972 | 4        | 111883901  | 111931917 | NP_808532.1        |
| T196   | Fibroadenoma      | 2       | 0.7634        | ENSMUSG00000034359 | 4        | 112055126  | 112145772 | OTTMUSG00000008540 |
| T196   | Fibroadenoma      | 2       | 0.7634        | ENSMUSG00000065318 | 4        | 112088704  | 112088810 | U6                 |
| T196   | Fibroadenoma      | 3       | 0.5618        | ENSMUSG00000048766 | 4        | 112209079  | 112272798 | A030001H23Rik      |
| T196   | Fibroadenoma      | 3       | 0.5618        | ENSMUSG00000060264 | 4        | 112453007  | 112454218 |                    |
| T196   | Fibroadenoma      | 3       | 0.5618        | ENSMUSG00000051602 | 4        | 112476241  | 112477763 |                    |
| T196   | Fibroadenoma      | 4       | -1.1496       | ENSMUSG00000052736 | 6        | 129615230  | 129626382 | Klrc2              |
| T196   | Fibroadenoma      | 4       | -1.1496       | ENSMUSG00000030167 | 6        | 129631714  | 129644629 | Klrc1              |
| T196   | Fibroadenoma      | 5       | -0.8665       | ENSMUSG00000070390 | 11       | 70988256   | 71034514  |                    |
| T196   | Fibroadenoma      | 5       | -0.8665       | ENSMUSG00000077340 | 11       | 71050002   | 71050135  | SNORA17            |
| T196   | Fibroadenoma      | 5       | -0.8665       | ENSMUSG00000040575 | 11       | 71058625   | 71101427  | Nlrp1c             |
| T196   | Fibroadenoma      | 5       | -0.8665       | ENSMUSG00000077632 | 11       | 71104620   | 71104753  | SNORA17            |
| T196   | Fibroadenoma      | 6       | -0.9057       | ENSMUSG00000041695 | 11       | 110882254  | 110891741 | Kcnj2              |
| T196   | Fibroadenoma      | 7       | 0.4003        | ENSMUSG00000034248 | 14       | 68195176   | 68238400  | Slc25a37           |
| T196   | Fibroadenoma      | 7       | 0.4003        | ENSMUSG00000047977 | 14       | 68243712   | 68247629  | D930020E02Rik      |
| T196   | Fibroadenoma      | 7       | 0.4003        | ENSMUSG00000022066 | 14       | 68290504   | 68320600  | Entpd4             |
| T196   | Fibroadenoma      | 7       | 0.4003        | ENSMUSG00000071316 | 14       | 68343957   | 68344433  | ENSMUSG00000071316 |
| T196   | Fibroadenoma      | 7       | 0.4003        | ENSMUSG00000034205 | 14       | 68344248   | 68428800  | Loxl2              |
| T196   | Fibroadenoma      | 7       | 0.4003        | ENSMUSG00000056640 | 14       | 68393255   | 68393578  | ENSMUSG00000056640 |
| T196   | Fibroadenoma      | 8       | 0.6755        | ENSMUSG00000052133 | 16       | 35461109   | 35584353  | Sema5b             |
| T196   | Fibroadenoma      | 9       | -1.052        | ENSMUSG00000071562 | 16       | 36099373   | 36204610  | Stfa3              |
| T219   | Fibroadenoma      | 1       | 0.5691        | ENSMUSG00000038209 | 1        | 173354798  | 173371968 | Itln1              |

## Supplementary Table 4. Regions showing copy number alterations in the tumor genome

| Sample | Histological type | segment | segment_mean_ | gene_id            | chromoso | gene_start | gene_end  | gene_symbol        |
|--------|-------------------|---------|---------------|--------------------|----------|------------|-----------|--------------------|
|        |                   | _id     | ratio         |                    | me       |            |           |                    |
| T219   | Fibroadenoma      | 1       | 0.5691        | ENSMUSG00000004709 | 1        | 173395868  | 173420260 | Cd244              |
| T219   | Fibroadenoma      | 2       | -0.4691       | ENSMUSG00000057234 | 2        | 108893139  | 109079129 | Mett5d1            |
| T219   | Fibroadenoma      | 2       | -0.4691       | ENSMUSG00000076987 | 2        | 108949428  | 108949537 |                    |
| T219   | Fibroadenoma      | 2       | -0.4691       | ENSMUSG00000027115 | 2        | 109081577  | 109142588 | Kif18a             |
| T219   | Fibroadenoma      | 3       | 0.408         | ENSMUSG00000044138 | 3        | 15348525   | 15551793  | Sirpb1             |
| T219   | Fibroadenoma      | 3       | 0.408         | ENSMUSG00000074677 | 3        | 15987305   | 16040598  | Sirpb1             |
| T219   | Fibroadenoma      | 4       | 0.9782        | ENSMUSG00000055960 | 4        | 111570571  | 111665328 | NP_848901.1        |
| T219   | Fibroadenoma      | 4       | 0.9782        | ENSMUSG00000070868 | 4        | 111733673  | 111796139 | A430090E18Rik      |
| T219   | Fibroadenoma      | 4       | 0.9782        | ENSMUSG00000049972 | 4        | 111883901  | 111931917 | NP_808532.1        |
| T219   | Fibroadenoma      | 4       | 0.9782        | ENSMUSG00000034359 | 4        | 112055126  | 112145772 | OTTMUSG00000008540 |
| T219   | Fibroadenoma      | 4       | 0.9782        | ENSMUSG00000065318 | 4        | 112088704  | 112088810 | U6                 |
| T219   | Fibroadenoma      | 5       | 0.7212        | ENSMUSG00000060264 | 4        | 112453007  | 112454218 |                    |
| T219   | Fibroadenoma      | 5       | 0.7212        | ENSMUSG00000051602 | 4        | 112476241  | 112477763 |                    |
| T219   | Fibroadenoma      | 6       | -0.4945       | ENSMUSG00000037221 | 5        | 137826426  | 137830828 | Mospd3             |
| T219   | Fibroadenoma      | 6       | -0.4945       | ENSMUSG00000075606 | 5        | 137831381  | 137831964 |                    |
| T219   | Fibroadenoma      | 6       | -0.4945       | ENSMUSG00000029718 | 5        | 137834897  | 137841156 | Pcolce             |
| T219   | Fibroadenoma      | 6       | -0.4945       | ENSMUSG00000029719 | 5        | 137842545  | 137854376 | Fbxo24             |
| T219   | Fibroadenoma      | 6       | -0.4945       | ENSMUSG00000029720 | 5        | 137858971  | 137870290 | Lrch4              |
| T219   | Fibroadenoma      | 6       | -0.4945       | ENSMUSG00000047182 | 5        | 137872820  | 137875502 | Irs3               |
| T219   | Fibroadenoma      | 6       | -0.4945       | ENSMUSG00000029722 | 5        | 137880271  | 137914405 | Hrbl               |
| T219   | Fibroadenoma      | 6       | -0.4945       | ENSMUSG00000067582 | 5        | 137901918  | 137902225 |                    |
| T219   | Fibroadenoma      | 6       | -0.4945       | ENSMUSG00000075603 | 5        | 137950457  | 137951528 | Q05D41_MOUSE       |
| T219   | Fibroadenoma      | 6       | -0.4945       | ENSMUSG00000045348 | 5        | 137960736  | 137971395 | 6430598A04Rik      |
| T219   | Fibroadenoma      | 6       | -0.4945       | ENSMUSG00000029723 | 5        | 137975784  | 137998180 | Tsc22d4            |
| T219   | Fibroadenoma      | 6       | -0.4945       | ENSMUSG00000029725 | 5        | 138008706  | 138009895 | NP_081518.1        |
| T219   | Fibroadenoma      | 6       | -0.4945       | ENSMUSG00000029726 | 5        | 138011709  | 138015961 | BN3D1_MOUSE        |
| T219   | Fibroadenoma      | 6       | -0.4945       | ENSMUSG00000037108 | 5        | 138017663  | 138052409 | Pilrb2             |
| T219   | Fibroadenoma      | 6       | -0.4945       | ENSMUSG00000046245 | 5        | 138051740  | 138065977 | PILRA_MOUSE        |
| T219   | Fibroadenoma      | 6       | -0.4945       | ENSMUSG00000066684 | 5        | 138084662  | 138087732 | PILRB_MOUSE        |
| T219   | Fibroadenoma      | 6       | -0.4945       | ENSMUSG00000066682 | 5        | 138098362  | 138101441 | Pilrb2             |
| T219   | Fibroadenoma      | 6       | -0.4945       | ENSMUSG00000029727 | 5        | 138122721  | 138151405 | Cyp3a13            |
| T219   | Fibroadenoma      | 6       | -0.4945       | ENSMUSG00000056966 | 5        | 138183597  | 138192747 | Gje1               |
| T219   | Fibroadenoma      | 6       | -0.4945       | ENSMUSG00000037053 | 5        | 138211324  | 138220018 | Azgp1              |
| T219   | Fibroadenoma      | 6       | -0.4945       | ENSMUSG00000063739 | 5        | 138222835  | 138223212 |                    |
| T219   | Fibroadenoma      | 6       | -0.4945       | ENSMUSG00000075599 | 5        | 138251064  | 138264445 | NP_001034978.1     |

## Supplementary Table 4. Regions showing copy number alterations in the tumor genome

| Sample | Histological type | segment_id | segment_mean_ratio | gene_id            | chromosome | gene_start | gene_end  | gene_symbol    |
|--------|-------------------|------------|--------------------|--------------------|------------|------------|-----------|----------------|
| T219   | Fibroadenoma      | 6          | -0.4945            | ENSMUSG00000075598 | 5          | 138267027  | 138280416 | NP_001034978.1 |
| T219   | Fibroadenoma      | 6          | -0.4945            | ENSMUSG00000060417 | 5          | 138294041  | 138295555 |                |
| T219   | Fibroadenoma      | 6          | -0.4945            | ENSMUSG00000029729 | 5          | 138314872  | 138337610 | Zkscan1        |
| T219   | Fibroadenoma      | 6          | -0.4945            | ENSMUSG00000037017 | 5          | 138346743  | 138364001 | Zscan21        |
| T219   | Fibroadenoma      | 6          | -0.4945            | ENSMUSG00000037007 | 5          | 138374455  | 138382687 | Zfp113         |
| T219   | Fibroadenoma      | 6          | -0.4945            | ENSMUSG00000019494 | 5          | 138390885  | 138393768 | Cops6          |
| T219   | Fibroadenoma      | 6          | -0.4945            | ENSMUSG00000029730 | 5          | 138394377  | 138401650 | Mcm7           |
| T219   | Fibroadenoma      | 6          | -0.4945            | ENSMUSG00000065394 | 5          | 138395109  | 138395192 | mmu-mir-25     |
| T219   | Fibroadenoma      | 6          | -0.4945            | ENSMUSG00000065527 | 5          | 138395311  | 138395398 | mmu-mir-93     |
| T219   | Fibroadenoma      | 6          | -0.4945            | ENSMUSG00000065514 | 5          | 138395525  | 138395606 | mmu-mir-106b   |
| T219   | Fibroadenoma      | 6          | -0.4945            | ENSMUSG00000019518 | 5          | 138401809  | 138408471 | Ap4m1          |
| T219   | Fibroadenoma      | 6          | -0.4945            | ENSMUSG00000036980 | 5          | 138408405  | 138416974 | Taf6           |
| T219   | Fibroadenoma      | 6          | -0.4945            | ENSMUSG00000036968 | 5          | 138417267  | 138423730 | 2610019P18Rik  |
| T219   | Fibroadenoma      | 6          | -0.4945            | ENSMUSG00000049285 | 5          | 138424102  | 138425188 | BC038925       |
| T219   | Fibroadenoma      | 6          | -0.4945            | ENSMUSG00000047592 | 5          | 138459674  | 138481432 | BC055004       |
| T219   | Fibroadenoma      | 6          | -0.4945            | ENSMUSG00000050552 | 5          | 138485519  | 138489172 | 0910001L09Rik  |
| T219   | Fibroadenoma      | 6          | -0.4945            | ENSMUSG00000036948 | 5          | 138489448  | 138493620 | BC037034       |
| T219   | Fibroadenoma      | 6          | -0.4945            | ENSMUSG00000075593 | 5          | 138494713  | 138502542 | Gal3st4        |
| T219   | Fibroadenoma      | 6          | -0.4945            | ENSMUSG00000029510 | 5          | 138503451  | 138509732 | Gpc2           |
| T219   | Fibroadenoma      | 6          | -0.4945            | ENSMUSG00000036928 | 5          | 138510339  | 138547607 | Stag3          |
| T219   | Fibroadenoma      | 6          | -0.4945            | ENSMUSG00000052024 | 5          | 138594048  | 138595340 | EG435427       |
| T219   | Fibroadenoma      | 6          | -0.4945            | ENSMUSG00000075591 | 5          | 138594202  | 138594606 | Q3V0I1_MOUSE   |
| T219   | Fibroadenoma      | 6          | -0.4945            | ENSMUSG00000064892 | 5          | 138608379  | 138608485 | U6             |
| T219   | Fibroadenoma      | 6          | -0.4945            | ENSMUSG00000036898 | 5          | 138671292  | 138690482 | Zfp157         |
| T219   | Fibroadenoma      | 6          | -0.4945            | ENSMUSG00000029526 | 5          | 138791628  | 138794482 | 1700123K08Rik  |
| T219   | Fibroadenoma      | 6          | -0.4945            | ENSMUSG00000058291 | 5          | 138834772  | 138849525 | Zfp68          |
| T219   | Fibroadenoma      | 6          | -0.4945            | ENSMUSG00000056014 | 5          | 138852664  | 138877606 | A430033K04Rik  |
| T219   | Fibroadenoma      | 7          | -0.7859            | ENSMUSG00000052736 | 6          | 129615230  | 129626382 | Klrc2          |
| T219   | Fibroadenoma      | 8          | -0.4544            | ENSMUSG00000035285 | 7          | 4525702    | 4528089   | Nat14          |
| T219   | Fibroadenoma      | 8          | -0.4544            | ENSMUSG00000035279 | 7          | 4528931    | 4547908   | A430110N23Rik  |
| T219   | Fibroadenoma      | 9          | -0.4741            | ENSMUSG00000074456 | 8          | 19732681   | 19778305  |                |
| T219   | Fibroadenoma      | 9          | -0.4741            | ENSMUSG00000059078 | 8          | 19784723   | 19788967  | XR_004244.1    |
| T219   | Fibroadenoma      | 9          | -0.4741            | ENSMUSG00000074455 | 8          | 19869350   | 19896121  | 4930467E23Rik  |
| T219   | Fibroadenoma      | 9          | -0.4741            | ENSMUSG00000071166 | 8          | 20087820   | 20088673  | AY761185       |
| T219   | Fibroadenoma      | 9          | -0.4741            | ENSMUSG00000071165 | 8          | 20114839   | 20115519  | EG574083       |

## Supplementary Table 4. Regions showing copy number alterations in the tumor genome

| Sample | Histological type | segment | segment_mean_ | gene_id            | chromoso | gene_start | gene_end | gene_symbol        |
|--------|-------------------|---------|---------------|--------------------|----------|------------|----------|--------------------|
|        |                   | _id     | ratio         |                    | me       |            |          |                    |
| T219   | Fibroadenoma      | 9       | -0.4741       | ENSMUSG00000074454 | 8        | 20134893   | 20137404 | EG654453           |
| T219   | Fibroadenoma      | 9       | -0.4741       | ENSMUSG00000065961 | 8        | 20145457   | 20194131 |                    |
| T219   | Fibroadenoma      | 9       | -0.4741       | ENSMUSG00000074453 | 8        | 20197458   | 20204345 | ENSMUSG00000074453 |
| T219   | Fibroadenoma      | 9       | -0.4741       | ENSMUSG00000074451 | 8        | 20282141   | 20439218 | 2610005L07Rik      |
| T219   | Fibroadenoma      | 9       | -0.4741       | ENSMUSG00000071796 | 8        | 20283639   | 20311823 | 2610005L07Rik      |
| T219   | Fibroadenoma      | 9       | -0.4741       | ENSMUSG00000074449 | 8        | 20353338   | 20377415 | 4930467E23Rik      |
| T219   | Fibroadenoma      | 9       | -0.4741       | ENSMUSG00000074447 | 8        | 22520296   | 22521268 | Defcr21            |
| T219   | Fibroadenoma      | 9       | -0.4741       | ENSMUSG00000075842 | 8        | 22535008   | 22535112 | U6                 |
| T219   | Fibroadenoma      | 9       | -0.4741       | ENSMUSG00000074446 | 8        | 22549833   | 22550673 | Defcr23            |
| T219   | Fibroadenoma      | 9       | -0.4741       | ENSMUSG00000061845 | 8        | 22559818   | 22560669 | Defcr5             |
| T219   | Fibroadenoma      | 9       | -0.4741       | ENSMUSG00000071164 | 8        | 22579194   | 22580037 | Defcr25            |
| T219   | Fibroadenoma      | 9       | -0.4741       | ENSMUSG00000056862 | 8        | 22586119   | 22586601 |                    |
| T219   | Fibroadenoma      | 9       | -0.4741       | ENSMUSG00000061958 | 8        | 22589826   | 22590802 | Defcr-rs1          |
| T219   | Fibroadenoma      | 9       | -0.4741       | ENSMUSG00000074444 | 8        | 22629415   | 22630255 | Defcr16            |
| T219   | Fibroadenoma      | 9       | -0.4741       | ENSMUSG00000074443 | 8        | 22657029   | 22658001 | Defcr22            |
| T219   | Fibroadenoma      | 9       | -0.4741       | ENSMUSG00000075795 | 8        | 22671520   | 22671624 | U6                 |
| T219   | Fibroadenoma      | 9       | -0.4741       | ENSMUSG00000074442 | 8        | 22686366   | 22687206 | Defcr23            |
| T219   | Fibroadenoma      | 9       | -0.4741       | ENSMUSG00000074441 | 8        | 22720158   | 22745213 |                    |
| T219   | Fibroadenoma      | 9       | -0.4741       | ENSMUSG00000074440 | 8        | 22782195   | 22783035 | Defcr3             |
| T219   | Fibroadenoma      | 9       | -0.4741       | ENSMUSG00000074439 | 8        | 22792191   | 22793033 | NP_031877.2        |
| T219   | Fibroadenoma      | 9       | -0.4741       | ENSMUSG00000074438 | 8        | 22810298   | 22811139 |                    |
| T219   | Fibroadenoma      | 9       | -0.4741       | ENSMUSG00000074437 | 8        | 22820640   | 22821772 | Defcr-rs1          |
| T219   | Fibroadenoma      | 9       | -0.4741       | ENSMUSG00000074436 | 8        | 22910620   | 22911455 |                    |
| T219   | Fibroadenoma      | 9       | -0.4741       | ENSMUSG00000065958 | 8        | 22974801   | 22975781 | Defcr20            |
| T219   | Fibroadenoma      | 9       | -0.4741       | ENSMUSG00000065957 | 8        | 22994575   | 23021832 | Defcr20            |
| T219   | Fibroadenoma      | 9       | -0.4741       | ENSMUSG00000075934 | 8        | 23013605   | 23013710 | U6                 |
| T219   | Fibroadenoma      | 9       | -0.4741       | ENSMUSG00000065956 | 8        | 23030959   | 23031810 | Defcr5             |
| T219   | Fibroadenoma      | 9       | -0.4741       | ENSMUSG00000074434 | 8        | 23048572   | 23049412 |                    |
| T219   | Fibroadenoma      | 9       | -0.4741       | ENSMUSG00000060070 | 8        | 23083728   | 23084436 | Defcr26            |
| T219   | Fibroadenoma      | 9       | -0.4741       | ENSMUSG00000060208 | 8        | 23121346   | 23122186 | Defcr3             |
| T219   | Fibroadenoma      | 9       | -0.4741       | ENSMUSG00000063206 | 8        | 23131342   | 23132184 |                    |
| T219   | Fibroadenoma      | 9       | -0.4741       | ENSMUSG00000058618 | 8        | 23168062   | 23169192 | AY761184           |
| T219   | Fibroadenoma      | 9       | -0.4741       | ENSMUSG00000064213 | 8        | 23200082   | 23200922 | Defcr24            |
| T219   | Fibroadenoma      | 9       | -0.4741       | ENSMUSG00000044748 | 8        | 23242144   | 23260730 | Defb1              |
| T219   | Fibroadenoma      | 9       | -0.4741       | ENSMUSG00000058568 | 8        | 23289084   | 23296845 | Defb50             |

## Supplementary Table 4. Regions showing copy number alterations in the tumor genome

| Sample | Histological type | segment | segment_mean_ | gene_id            | chromoso | gene_start | gene_end | gene_symbol   |
|--------|-------------------|---------|---------------|--------------------|----------|------------|----------|---------------|
|        |                   | _id     | ratio         |                    | me       |            |          |               |
| T219   | Fibroadenoma      | 9       | -0.4741       | ENSMUSG00000006570 | 8        | 23305471   | 23309027 | Defb2         |
| T219   | Fibroadenoma      | 9       | -0.4741       | ENSMUSG00000044743 | 8        | 23324446   | 23327556 | Defb10        |
| T219   | Fibroadenoma      | 9       | -0.4741       | ENSMUSG00000047390 | 8        | 23347281   | 23350966 | Defb9         |
| T219   | Fibroadenoma      | 9       | -0.4741       | ENSMUSG00000045337 | 8        | 23370933   | 23371956 | Defb11        |
| T219   | Fibroadenoma      | 9       | -0.4741       | ENSMUSG00000048500 | 8        | 23395358   | 23398255 | Defb15        |
| T219   | Fibroadenoma      | 9       | -0.4741       | ENSMUSG00000058052 | 8        | 23403897   | 23406348 | Defb35        |
| T219   | Fibroadenoma      | 9       | -0.4741       | ENSMUSG00000044222 | 8        | 23412336   | 23414395 | Defb13        |
| T219   | Fibroadenoma      | 9       | -0.4741       | ENSMUSG00000017049 | 8        | 23435320   | 23439586 | Ccdc70        |
| T219   | Fibroadenoma      | 9       | -0.4741       | ENSMUSG00000006567 | 8        | 23459893   | 23525621 | Atp7b         |
| T219   | Fibroadenoma      | 9       | -0.4741       | ENSMUSG00000063362 | 8        | 23526272   | 23537170 | Alg11         |
| T219   | Fibroadenoma      | 9       | -0.4741       | ENSMUSG00000037738 | 8        | 23539161   | 23590598 | Nek5          |
| T219   | Fibroadenoma      | 9       | -0.4741       | ENSMUSG00000031478 | 8        | 23593830   | 23631957 | Nek3          |
| T219   | Fibroadenoma      | 9       | -0.4741       | ENSMUSG00000037725 | 8        | 23633994   | 23651364 | Ckap2         |
| T219   | Fibroadenoma      | 9       | -0.4741       | ENSMUSG00000031479 | 8        | 23658405   | 23684142 | Vps36         |
| T219   | Fibroadenoma      | 9       | -0.4741       | ENSMUSG00000031480 | 8        | 23692885   | 23726867 | Thsd1         |
| T219   | Fibroadenoma      | 9       | -0.4741       | ENSMUSG00000031481 | 8        | 23748986   | 23836963 | Tpte          |
| T219   | Fibroadenoma      | 9       | -0.4741       | ENSMUSG00000031482 | 8        | 23841552   | 23864098 | Slc25a15      |
| T219   | Fibroadenoma      | 9       | -0.4741       | ENSMUSG00000074423 | 8        | 23874452   | 23874540 |               |
| T219   | Fibroadenoma      | 9       | -0.4741       | ENSMUSG00000031533 | 8        | 23876927   | 23895210 | Mrps31        |
| T219   | Fibroadenoma      | 9       | -0.4741       | ENSMUSG00000031534 | 8        | 23928159   | 23942400 | Al316807      |
| T219   | Fibroadenoma      | 9       | -0.4741       | ENSMUSG00000037656 | 8        | 23942333   | 24035157 | Slc20a2       |
| T219   | Fibroadenoma      | 9       | -0.4741       | ENSMUSG00000008892 | 8        | 24042620   | 24059306 | Vdac3         |
| T219   | Fibroadenoma      | 9       | -0.4741       | ENSMUSG00000031535 | 8        | 24089588   | 24093092 | Dkk4          |
| T219   | Fibroadenoma      | 9       | -0.4741       | ENSMUSG00000031536 | 8        | 24093675   | 24118966 | Polb          |
| T219   | Fibroadenoma      | 9       | -0.4741       | ENSMUSG00000031537 | 8        | 24124758   | 24172108 | Ikbkb         |
| T219   | Fibroadenoma      | 9       | -0.4741       | ENSMUSG00000031538 | 8        | 24223292   | 24248389 | Plat          |
| T219   | Fibroadenoma      | 9       | -0.4741       | ENSMUSG00000031539 | 8        | 24252900   | 24271172 | Ap3m2         |
| T219   | Fibroadenoma      | 9       | -0.4741       | ENSMUSG00000054822 | 8        | 24271311   | 24275082 | 1700041G16Rik |
| T219   | Fibroadenoma      | 9       | -0.4741       | ENSMUSG00000031540 | 8        | 24325084   | 24406187 | Myst3         |
| T219   | Fibroadenoma      | 9       | -0.4741       | ENSMUSG00000058567 | 8        | 24423749   | 24423988 |               |
| T219   | Fibroadenoma      | 9       | -0.4741       | ENSMUSG00000031543 | 8        | 24440681   | 24616041 | Ank1          |
| T219   | Fibroadenoma      | 9       | -0.4741       | ENSMUSG00000070084 | 8        | 24608100   | 24608227 | mmu-mir-486   |
| T219   | Fibroadenoma      | 9       | -0.4741       | ENSMUSG00000063672 | 8        | 24618816   | 24624183 | Nkx6-3        |
| T219   | Fibroadenoma      | 9       | -0.4741       | ENSMUSG00000031545 | 8        | 24638491   | 24673891 | Agpat6        |
| T219   | Fibroadenoma      | 9       | -0.4741       | ENSMUSG00000031546 | 8        | 24692170   | 24703204 | Gins4         |

## Supplementary Table 4. Regions showing copy number alterations in the tumor genome

| Sample | Histological type | segment | segment_mean_ | gene_id            | chromoso | gene_start | gene_end | gene_symbol        |
|--------|-------------------|---------|---------------|--------------------|----------|------------|----------|--------------------|
|        |                   | _id     | ratio         |                    | me       |            |          |                    |
| T219   | Fibroadenoma      | 9       | -0.4741       | ENSMUSG00000015341 | 8        | 24706898   | 24722600 | Golga7             |
| T219   | Fibroadenoma      | 9       | -0.4741       | ENSMUSG00000047308 | 8        | 24722284   | 24723561 | 4930518F22Rik      |
| T219   | Fibroadenoma      | 9       | -0.4741       | ENSMUSG00000077399 | 8        | 24755578   | 24755709 | SNORA17            |
| T219   | Fibroadenoma      | 9       | -0.4741       | ENSMUSG00000031548 | 8        | 24877063   | 24915179 | Sfrp1              |
| T219   | Fibroadenoma      | 9       | -0.4741       | ENSMUSG00000037492 | 8        | 25135208   | 25528648 | Zmat4              |
| T219   | Fibroadenoma      | 9       | -0.4741       | ENSMUSG00000053979 | 8        | 25639449   | 25651115 | A730045E13Rik      |
| T219   | Fibroadenoma      | 9       | -0.4741       | ENSMUSG00000056313 | 8        | 25904121   | 25904441 | 1810011O10Rik      |
| T219   | Fibroadenoma      | 9       | -0.4741       | ENSMUSG00000031549 | 8        | 25997999   | 26041878 | Indol1             |
| T219   | Fibroadenoma      | 9       | -0.4741       | ENSMUSG00000031551 | 8        | 26049686   | 26062554 | Indo               |
| T219   | Fibroadenoma      | 9       | -0.4741       | ENSMUSG00000031552 | 8        | 26067792   | 26140300 | Adam18             |
| T219   | Fibroadenoma      | 9       | -0.4741       | ENSMUSG00000031553 | 8        | 26146263   | 26191333 | Adam3              |
| T219   | Fibroadenoma      | 9       | -0.4741       | ENSMUSG00000031554 | 8        | 26192737   | 26289604 | Adam5              |
| T219   | Fibroadenoma      | 9       | -0.4741       | ENSMUSG00000037437 | 8        | 26317781   | 26414328 | Adam32             |
| T219   | Fibroadenoma      | 9       | -0.4741       | ENSMUSG00000031555 | 8        | 26415157   | 26482450 | Adam9              |
| T219   | Fibroadenoma      | 9       | -0.4741       | ENSMUSG00000031556 | 8        | 26482798   | 26488803 | Tm2d2              |
| T219   | Fibroadenoma      | 9       | -0.4741       | ENSMUSG00000037406 | 8        | 26490929   | 26504426 | Htra4              |
| T219   | Fibroadenoma      | 9       | -0.4741       | ENSMUSG00000031557 | 8        | 26506385   | 26567739 | Plekha2            |
| T219   | Fibroadenoma      | 9       | -0.4741       | ENSMUSG00000065954 | 8        | 26620097   | 26666830 | Tacc1              |
| T219   | Fibroadenoma      | 9       | -0.4741       | ENSMUSG00000074412 | 8        | 26919798   | 26920309 | NM_024175.2        |
| T219   | Fibroadenoma      | 9       | -0.4741       | ENSMUSG00000031565 | 8        | 26997826   | 27039466 | Fgfr1              |
| T219   | Fibroadenoma      | 9       | -0.4741       | ENSMUSG00000037363 | 8        | 27044040   | 27063032 | Letm2              |
| T219   | Fibroadenoma      | 9       | -0.4741       | ENSMUSG00000043794 | 8        | 27062559   | 27063008 |                    |
| T219   | Fibroadenoma      | 9       | -0.4741       | ENSMUSG00000054823 | 8        | 27067851   | 27179945 | Whsc111            |
| T219   | Fibroadenoma      | 9       | -0.4741       | ENSMUSG00000031570 | 8        | 27185606   | 27190223 | Ppapdc1            |
| T219   | Fibroadenoma      | 9       | -0.4741       | ENSMUSG00000061313 | 8        | 27190894   | 27219954 | Ddhd2              |
| T219   | Fibroadenoma      | 9       | -0.4741       | ENSMUSG00000054427 | 8        | 27220054   | 27235249 | ENSMUSG00000054427 |
| T219   | Fibroadenoma      | 9       | -0.4741       | ENSMUSG00000037316 | 8        | 27230081   | 27250754 | Bag4               |
| T219   | Fibroadenoma      | 9       | -0.4741       | ENSMUSG00000037296 | 8        | 27251136   | 27269520 | Lsm1               |
| T219   | Fibroadenoma      | 9       | -0.4741       | ENSMUSG00000031574 | 8        | 27274058   | 27281527 | Star               |
| T219   | Fibroadenoma      | 9       | -0.4741       | ENSMUSG00000031575 | 8        | 27281764   | 27306308 | Ash2l              |
| T219   | Fibroadenoma      | 9       | -0.4741       | ENSMUSG00000031576 | 8        | 27315201   | 27403347 | Kcnu1              |
| T219   | Fibroadenoma      | 9       | -0.4741       | ENSMUSG00000037260 | 8        | 27409999   | 27442256 | Hgsnat             |
| T219   | Fibroadenoma      | 9       | -0.4741       | ENSMUSG00000037251 | 8        | 27446149   | 27459666 | 4930444A02Rik      |
| T219   | Fibroadenoma      | 9       | -0.4741       | ENSMUSG00000015994 | 8        | 27464267   | 27481146 | Fnta               |
| T219   | Fibroadenoma      | 9       | -0.4741       | ENSMUSG00000037234 | 8        | 27496216   | 27584679 | Hook3              |



## Supplementary Table 4. Regions showing copy number alterations in the tumor genome

| Sample | Histological type | segment | segment_mean_ | gene_id            | chromoso | gene_start | gene_end | gene_symbol   |
|--------|-------------------|---------|---------------|--------------------|----------|------------|----------|---------------|
|        |                   | _id     | ratio         |                    | me       |            |          |               |
| T219   | Fibroadenoma      | 9       | -0.4741       | ENSMUSG00000013878 | 8        | 27585066   | 27607163 | Rnf170        |
| T219   | Fibroadenoma      | 9       | -0.4741       | ENSMUSG00000037214 | 8        | 27623757   | 27628579 | Thap1         |
| T219   | Fibroadenoma      | 9       | -0.4741       | ENSMUSG00000065951 | 8        | 28363721   | 28446030 |               |
| T219   | Fibroadenoma      | 9       | -0.4741       | ENSMUSG00000031483 | 8        | 28489795   | 28505373 | Erlin2        |
| T219   | Fibroadenoma      | 9       | -0.4741       | ENSMUSG00000045549 | 8        | 28508484   | 28508888 | Q9D9Z8_MOUSE  |
| T219   | Fibroadenoma      | 9       | -0.4741       | ENSMUSG00000031485 | 8        | 28508534   | 28522235 | Prosc         |
| T219   | Fibroadenoma      | 9       | -0.4741       | ENSMUSG00000031486 | 8        | 28551777   | 28589358 | Gpr124        |
| T219   | Fibroadenoma      | 9       | -0.4741       | ENSMUSG00000031487 | 8        | 28589300   | 28594570 | Brf2          |
| T219   | Fibroadenoma      | 9       | -0.4741       | ENSMUSG00000031488 | 8        | 28607894   | 28640582 | Rab11fip1     |
| T219   | Fibroadenoma      | 9       | -0.4741       | ENSMUSG00000039720 | 8        | 28663395   | 28668483 | Got1l1        |
| T219   | Fibroadenoma      | 9       | -0.4741       | ENSMUSG00000031489 | 8        | 28691712   | 28695524 | Adrb3         |
| T219   | Fibroadenoma      | 9       | -0.4741       | ENSMUSG00000031490 | 8        | 28726338   | 28742604 | Eif4ebp1      |
| T219   | Fibroadenoma      | 9       | -0.4741       | ENSMUSG00000071138 | 8        | 28810330   | 28815130 | Tex24         |
| T219   | Fibroadenoma      | 9       | -0.4741       | ENSMUSG00000031492 | 8        | 28834647   | 28865665 | Chrn3         |
| T219   | Fibroadenoma      | 9       | -0.4741       | ENSMUSG00000031491 | 8        | 28869148   | 28879638 | Chrna6        |
| T219   | Fibroadenoma      | 9       | -0.4741       | ENSMUSG00000065367 | 8        | 28887260   | 28887366 | U6            |
| T219   | Fibroadenoma      | 9       | -0.4741       | ENSMUSG00000063932 | 8        | 28913606   | 28960858 | 4921537P18Rik |
| T219   | Fibroadenoma      | 9       | -0.4741       | ENSMUSG00000074404 | 8        | 29070287   | 29086388 | Gm1698        |
| T219   | Fibroadenoma      | 9       | -0.4741       | ENSMUSG00000064882 | 8        | 29226945   | 29227043 | U6            |
| T219   | Fibroadenoma      | 9       | -0.4741       | ENSMUSG00000064019 | 8        | 29549260   | 29550851 | XR_001871.1   |
| T219   | Fibroadenoma      | 9       | -0.4741       | ENSMUSG00000063626 | 8        | 30118704   | 30685274 | Unc5d         |
| T219   | Fibroadenoma      | 9       | -0.4741       | ENSMUSG00000053570 | 8        | 30552417   | 30552745 |               |
| T219   | Fibroadenoma      | 9       | -0.4741       | ENSMUSG00000043096 | 8        | 30752364   | 30795050 |               |
| T219   | Fibroadenoma      | 9       | -0.4741       | ENSMUSG00000071111 | 8        | 31647797   | 31649460 | XR_003303.1   |
| T219   | Fibroadenoma      | 9       | -0.4741       | ENSMUSG00000057689 | 8        | 32469800   | 32470254 | XR_003324.1   |
| T219   | Fibroadenoma      | 9       | -0.4741       | ENSMUSG00000039661 | 8        | 32555597   | 32562982 | Dusp26        |
| T219   | Fibroadenoma      | 9       | -0.4741       | ENSMUSG00000039328 | 8        | 32577781   | 32597417 | Rnf122        |
| T219   | Fibroadenoma      | 9       | -0.4741       | ENSMUSG00000031577 | 8        | 32616250   | 32628598 | BC019943      |
| T219   | Fibroadenoma      | 9       | -0.4741       | ENSMUSG00000031578 | 8        | 32625403   | 32634659 | Rbm13         |
| T219   | Fibroadenoma      | 9       | -0.4741       | ENSMUSG00000046152 | 8        | 32653313   | 32727418 | Fut10         |
| T219   | Fibroadenoma      | 9       | -0.4741       | ENSMUSG00000046356 | 8        | 32745807   | 32746796 |               |
| T219   | Fibroadenoma      | 9       | -0.4741       | ENSMUSG00000031579 | 8        | 33202989   | 33205698 |               |
| T219   | Fibroadenoma      | 9       | -0.4741       | ENSMUSG00000062991 | 8        | 33283963   | 33475044 | Nrg1          |
| T219   | Fibroadenoma      | 9       | -0.4741       | ENSMUSG00000065950 | 8        | 33942818   | 33943264 |               |
| T219   | Fibroadenoma      | 9       | -0.4741       | ENSMUSG00000065949 | 8        | 34349452   | 34350189 |               |

## Supplementary Table 4. Regions showing copy number alterations in the tumor genome

| Sample | Histological type | segment | segment_mean_ | gene_id            | chromoso | gene_start | gene_end | gene_symbol        |
|--------|-------------------|---------|---------------|--------------------|----------|------------|----------|--------------------|
|        |                   | _id     | ratio         |                    | me       |            |          |                    |
| T219   | Fibroadenoma      | 9       | -0.4741       | ENSMUSG00000043270 | 8        | 34657131   | 34658231 | Gtpbp10            |
| T219   | Fibroadenoma      | 9       | -0.4741       | ENSMUSG00000031583 | 8        | 34701594   | 34851407 | Wrn                |
| T219   | Fibroadenoma      | 9       | -0.4741       | ENSMUSG00000049184 | 8        | 34851559   | 34883402 | Purg               |
| T219   | Fibroadenoma      | 9       | -0.4741       | ENSMUSG00000048544 | 8        | 34894731   | 34897949 | 5930422O12Rik      |
| T219   | Fibroadenoma      | 9       | -0.4741       | ENSMUSG00000070059 | 8        | 34900077   | 34900777 |                    |
| T219   | Fibroadenoma      | 9       | -0.4741       | ENSMUSG00000070058 | 8        | 34950131   | 34951102 | Hmgb1-rs17         |
| T219   | Fibroadenoma      | 9       | -0.4741       | ENSMUSG00000009628 | 8        | 34983259   | 35051520 | Tex15              |
| T219   | Fibroadenoma      | 9       | -0.4741       | ENSMUSG00000009630 | 8        | 35065560   | 35085738 | Ppp2cb             |
| T219   | Fibroadenoma      | 9       | -0.4741       | ENSMUSG00000052906 | 8        | 35085521   | 35107911 | Ubx6               |
| T219   | Fibroadenoma      | 9       | -0.4741       | ENSMUSG00000031584 | 8        | 35119173   | 35164097 | Gsr                |
| T219   | Fibroadenoma      | 9       | -0.4741       | ENSMUSG00000049476 | 8        | 35196473   | 35197749 | 1700104B16Rik      |
| T219   | Fibroadenoma      | 9       | -0.4741       | ENSMUSG00000031585 | 8        | 35197977   | 35243099 | Gtf2e2             |
| T219   | Fibroadenoma      | 9       | -0.4741       | ENSMUSG00000031586 | 8        | 35248579   | 35395741 | Rbpms              |
| T219   | Fibroadenoma      | 9       | -0.4741       | ENSMUSG00000054618 | 8        | 35523139   | 35525563 | ENSMUSG00000054618 |
| T219   | Fibroadenoma      | 9       | -0.4741       | ENSMUSG00000031516 | 8        | 35558940   | 35576975 | Dctn6              |
| T219   | Fibroadenoma      | 9       | -0.4741       | ENSMUSG00000063412 | 8        | 35579905   | 35580219 | Erh                |
| T219   | Fibroadenoma      | 9       | -0.4741       | ENSMUSG00000071113 | 8        | 35592261   | 35593235 |                    |
| T219   | Fibroadenoma      | 9       | -0.4741       | ENSMUSG00000031513 | 8        | 35604089   | 35615256 | Leprotl1           |
| T219   | Fibroadenoma      | 9       | -0.4741       | ENSMUSG00000031532 | 8        | 35623093   | 35639336 | Tmem66             |
| T219   | Fibroadenoma      | 9       | -0.4741       | ENSMUSG00000062196 | 8        | 35775802   | 35776204 |                    |
| T219   | Fibroadenoma      | 9       | -0.4741       | ENSMUSG00000060414 | 8        | 35790372   | 35790802 |                    |
| T219   | Fibroadenoma      | 9       | -0.4741       | ENSMUSG00000060242 | 8        | 35796430   | 35796873 | EG546808           |
| T219   | Fibroadenoma      | 9       | -0.4741       | ENSMUSG00000031530 | 8        | 36276127   | 36288411 | Dusp4              |
| T219   | Fibroadenoma      | 9       | -0.4741       | ENSMUSG00000053051 | 8        | 36296769   | 36297101 | Tnks               |
| T219   | Fibroadenoma      | 9       | -0.4741       | ENSMUSG00000031529 | 8        | 36297696   | 36434207 | Tnks               |
| T219   | Fibroadenoma      | 9       | -0.4741       | ENSMUSG00000054247 | 8        | 36433571   | 36434726 |                    |
| T219   | Fibroadenoma      | 9       | -0.4741       | ENSMUSG00000072435 | 8        | 36521324   | 36521900 |                    |
| T219   | Fibroadenoma      | 9       | -0.4741       | ENSMUSG00000059827 | 8        | 36601513   | 36602016 |                    |
| T219   | Fibroadenoma      | 9       | -0.4741       | ENSMUSG00000046794 | 8        | 36844258   | 36856662 | Ppp1r3b            |
| T219   | Fibroadenoma      | 9       | -0.4741       | ENSMUSG00000031527 | 8        | 36935756   | 36964052 | Thex1              |
| T219   | Fibroadenoma      | 9       | -0.4741       | ENSMUSG00000070056 | 8        | 37056315   | 37147964 | Mfhas1             |
| T219   | Fibroadenoma      | 9       | -0.4741       | ENSMUSG00000038785 | 8        | 37240318   | 37276208 |                    |
| T219   | Fibroadenoma      | 9       | -0.4741       | ENSMUSG00000055976 | 8        | 37293959   | 37294849 | Cldn23             |
| T219   | Fibroadenoma      | 9       | -0.4741       | ENSMUSG00000059333 | 8        | 37494270   | 37494653 |                    |
| T219   | Fibroadenoma      | 9       | -0.4741       | ENSMUSG00000050271 | 8        | 37563378   | 37616061 | D8Ert82e           |

## Supplementary Table 4. Regions showing copy number alterations in the tumor genome

| Sample | Histological type | segment_id | segment_mean_ratio | gene_id            | chromosome | gene_start | gene_end | gene_symbol        |
|--------|-------------------|------------|--------------------|--------------------|------------|------------|----------|--------------------|
| T219   | Fibroadenoma      | 9          | -0.4741            | ENSMUSG00000039633 | 8          | 37685960   | 37697772 | NP_001074619.1     |
| T219   | Fibroadenoma      | 9          | -0.4741            | ENSMUSG00000062517 | 8          | 37841113   | 37842150 |                    |
| T219   | Fibroadenoma      | 9          | -0.4741            | ENSMUSG00000039620 | 8          | 37926065   | 37981473 | 6430573F11Rik      |
| T219   | Fibroadenoma      | 9          | -0.4741            | ENSMUSG00000031523 | 8          | 38038050   | 38201243 | Dlc1               |
| T219   | Fibroadenoma      | 9          | -0.4741            | ENSMUSG00000039594 | 8          | 38317643   | 38420953 | A730069N07Rik      |
| T219   | Fibroadenoma      | 9          | -0.4741            | ENSMUSG00000074384 | 8          | 38462099   | 38463251 | AI429214           |
| T219   | Fibroadenoma      | 9          | -0.4741            | ENSMUSG00000074383 | 8          | 38558487   | 38558696 | ENSMUSG00000074383 |
| T219   | Fibroadenoma      | 9          | -0.4741            | ENSMUSG00000054950 | 8          | 38573843   | 38574520 |                    |
| T219   | Fibroadenoma      | 9          | -0.4741            | ENSMUSG00000016505 | 8          | 38623223   | 38624331 |                    |
| T219   | Fibroadenoma      | 9          | -0.4741            | ENSMUSG00000065277 | 8          | 38785994   | 38786095 | U6                 |
| T219   | Fibroadenoma      | 9          | -0.4741            | ENSMUSG00000039539 | 8          | 38991779   | 39421574 | Sgcz               |
| T219   | Fibroadenoma      | 9          | -0.4741            | ENSMUSG00000065457 | 8          | 39720648   | 39720721 | mmu-mir-383        |
| T219   | Fibroadenoma      | 9          | -0.4741            | ENSMUSG00000077445 | 8          | 40451421   | 40451552 | SNORA17            |
| T219   | Fibroadenoma      | 9          | -0.4741            | ENSMUSG00000039530 | 8          | 40474409   | 40665143 | Tusc3              |
| T219   | Fibroadenoma      | 9          | -0.4741            | ENSMUSG00000046582 | 8          | 40954758   | 40956013 |                    |
| T219   | Fibroadenoma      | 9          | -0.4741            | ENSMUSG00000025044 | 8          | 41080502   | 41131646 | Msr1               |
| T219   | Fibroadenoma      | 9          | -0.4741            | ENSMUSG00000039505 | 8          | 41219059   | 41219789 |                    |
| T219   | Fibroadenoma      | 9          | -0.4741            | ENSMUSG00000074381 | 8          | 41431563   | 41431820 | ENSMUSG00000074381 |
| T219   | Fibroadenoma      | 9          | -0.4741            | ENSMUSG00000031603 | 8          | 41777983   | 41785770 | Fgf20              |
| T219   | Fibroadenoma      | 9          | -0.4741            | ENSMUSG00000039478 | 8          | 41834732   | 41853220 | 2900075B16Rik      |
| T219   | Fibroadenoma      | 9          | -0.4741            | ENSMUSG00000039470 | 8          | 41922635   | 41984533 | Zdhhc2             |
| T219   | Fibroadenoma      | 9          | -0.4741            | ENSMUSG00000031601 | 8          | 41991359   | 42010561 | Cnot7              |
| T219   | Fibroadenoma      | 9          | -0.4741            | ENSMUSG00000031600 | 8          | 42010620   | 42043841 | Vps37a             |
| T219   | Fibroadenoma      | 9          | -0.4741            | ENSMUSG00000039431 | 8          | 42050368   | 42107833 | Mtmr7              |
| T219   | Fibroadenoma      | 9          | -0.4741            | ENSMUSG00000046723 | 8          | 42173911   | 42181016 | Adam24             |
| T219   | Fibroadenoma      | 9          | -0.4741            | ENSMUSG00000069864 | 8          | 42211576   | 42212104 |                    |
| T219   | Fibroadenoma      | 9          | -0.4741            | ENSMUSG00000071937 | 8          | 42251025   | 42254993 | Adam25             |
| T219   | Fibroadenoma      | 9          | -0.4741            | ENSMUSG00000046282 | 8          | 42293672   | 42295954 | 4930529F22Rik      |
| T219   | Fibroadenoma      | 9          | -0.4741            | ENSMUSG00000054033 | 8          | 42321865   | 42325678 | Adam39             |
| T219   | Fibroadenoma      | 9          | -0.4741            | ENSMUSG00000031596 | 8          | 42397761   | 42415357 | Slc7a2             |
| T219   | Fibroadenoma      | 9          | -0.4741            | ENSMUSG00000031595 | 8          | 42425058   | 42489599 | Pdgfrl             |
| T219   | Fibroadenoma      | 9          | -0.4741            | ENSMUSG00000052122 | 8          | 42489018   | 42489359 | Q8BU63_MOUSE       |
| T219   | Fibroadenoma      | 9          | -0.4741            | ENSMUSG00000045636 | 8          | 42489736   | 42613484 | Mtus1              |
| T219   | Fibroadenoma      | 9          | -0.4741            | ENSMUSG00000031594 | 8          | 42690254   | 42713970 | Fgl1               |
| T219   | Fibroadenoma      | 9          | -0.4741            | ENSMUSG00000031592 | 8          | 42738590   | 42831161 | Pcm1               |

## Supplementary Table 4. Regions showing copy number alterations in the tumor genome

| Sample | Histological type | segment | segment_mean_ | gene_id            | chromoso | gene_start | gene_end | gene_symbol   |
|--------|-------------------|---------|---------------|--------------------|----------|------------|----------|---------------|
|        |                   | _id     | ratio         |                    | me       |            |          |               |
| T219   | Fibroadenoma      | 9       | -0.4741       | ENSMUSG00000031591 | 8        | 42839468   | 42873466 | Asah1         |
| T219   | Fibroadenoma      | 9       | -0.4741       | ENSMUSG00000031590 | 8        | 42896276   | 42915891 | Frg1          |
| T219   | Fibroadenoma      | 9       | -0.4741       | ENSMUSG00000077186 | 8        | 43021555   | 43021604 | U7            |
| T219   | Fibroadenoma      | 9       | -0.4741       | ENSMUSG00000071108 | 8        | 43156410   | 43157486 |               |
| T219   | Fibroadenoma      | 9       | -0.4741       | ENSMUSG00000058906 | 8        | 43580277   | 43581926 | Zfp353        |
| T219   | Fibroadenoma      | 9       | -0.4741       | ENSMUSG00000053038 | 8        | 43745728   | 43746228 | XR_003834.1   |
| T219   | Fibroadenoma      | 9       | -0.4741       | ENSMUSG00000077755 | 8        | 44020953   | 44021020 | SNORD95       |
| T219   | Fibroadenoma      | 9       | -0.4741       | ENSMUSG00000031651 | 8        | 44628624   | 44640303 | Triml1        |
| T219   | Fibroadenoma      | 9       | -0.4741       | ENSMUSG00000070049 | 8        | 44640869   | 44642973 |               |
| T219   | Fibroadenoma      | 9       | -0.4741       | ENSMUSG00000072434 | 8        | 44657574   | 44660408 |               |
| T219   | Fibroadenoma      | 9       | -0.4741       | ENSMUSG00000058309 | 8        | 44696864   | 44699207 |               |
| T219   | Fibroadenoma      | 9       | -0.4741       | ENSMUSG00000051176 | 8        | 44793885   | 44805797 | Zfp42         |
| T219   | Fibroadenoma      | 9       | -0.4741       | ENSMUSG00000070048 | 8        | 44811154   | 44812725 |               |
| T219   | Fibroadenoma      | 9       | -0.4741       | ENSMUSG00000063900 | 8        | 45018681   | 45020780 | Adam26b       |
| T219   | Fibroadenoma      | 9       | -0.4741       | ENSMUSG00000048516 | 8        | 45067095   | 45075524 | Adam26a       |
| T219   | Fibroadenoma      | 9       | -0.4741       | ENSMUSG00000050190 | 8        | 45123792   | 45126002 | EG384813      |
| T219   | Fibroadenoma      | 9       | -0.4741       | ENSMUSG00000062414 | 8        | 45149279   | 45151423 | Adam34        |
| T219   | Fibroadenoma      | 9       | -0.4741       | ENSMUSG00000056818 | 8        | 45172637   | 45174778 | EG384814      |
| T219   | Fibroadenoma      | 9       | -0.4741       | ENSMUSG00000077694 | 8        | 46306498   | 46306546 | U7            |
| T219   | Fibroadenoma      | 9       | -0.4741       | ENSMUSG00000053524 | 8        | 46433578   | 46433884 |               |
| T219   | Fibroadenoma      | 9       | -0.4741       | ENSMUSG00000070047 | 8        | 46434264   | 46551072 | Fat1          |
| T219   | Fibroadenoma      | 9       | -0.4741       | ENSMUSG00000066158 | 8        | 46560884   | 46561270 | AY512931      |
| T219   | Fibroadenoma      | 9       | -0.4741       | ENSMUSG00000054764 | 8        | 46568027   | 46587323 | Mtnr1a        |
| T219   | Fibroadenoma      | 9       | -0.4741       | ENSMUSG00000031645 | 8        | 46739987   | 46760848 | F11           |
| T219   | Fibroadenoma      | 9       | -0.4741       | ENSMUSG00000031640 | 8        | 46768488   | 46832013 | Cyp4v3        |
| T219   | Fibroadenoma      | 9       | -0.4741       | ENSMUSG00000070044 | 8        | 46835534   | 46881001 | BC035537      |
| T219   | Fibroadenoma      | 9       | -0.4741       | ENSMUSG00000031639 | 8        | 46894482   | 46909356 | Tlr3          |
| T219   | Fibroadenoma      | 9       | -0.4741       | ENSMUSG00000077499 | 8        | 47080433   | 47080564 | SNORA17       |
| T219   | Fibroadenoma      | 9       | -0.4741       | ENSMUSG00000031626 | 8        | 47157109   | 47326721 | Sorbs2        |
| T219   | Fibroadenoma      | 9       | -0.4741       | ENSMUSG00000031636 | 8        | 47384302   | 47418363 | Pdlim3        |
| T219   | Fibroadenoma      | 9       | -0.4741       | ENSMUSG00000071104 | 8        | 47433466   | 47442962 | Ccdc110       |
| T219   | Fibroadenoma      | 9       | -0.4741       | ENSMUSG00000071103 | 8        | 47452423   | 47474069 | 1700029J07Rik |
| T219   | Fibroadenoma      | 9       | -0.4741       | ENSMUSG00000031634 | 8        | 47474345   | 47495771 | 1810047C23Rik |
| T219   | Fibroadenoma      | 9       | -0.4741       | ENSMUSG00000050914 | 8        | 47495719   | 47498667 | Ankrd37       |
| T219   | Fibroadenoma      | 9       | -0.4741       | ENSMUSG00000031637 | 8        | 47498125   | 47526203 | Lrp2bp        |

## Supplementary Table 4. Regions showing copy number alterations in the tumor genome

| Sample | Histological type | segment | segment_mean_ | gene_id            | chromoso | gene_start | gene_end | gene_symbol        |
|--------|-------------------|---------|---------------|--------------------|----------|------------|----------|--------------------|
|        |                   | _id     | ratio         |                    | me       |            |          |                    |
| T219   | Fibroadenoma      | 9       | -0.4741       | ENSMUSG00000038291 | 8        | 47532089   | 47615519 | Snx25              |
| T219   | Fibroadenoma      | 9       | -0.4741       | ENSMUSG00000031631 | 8        | 47662506   | 47694401 | 4933411K20Rik      |
| T219   | Fibroadenoma      | 9       | -0.4741       | ENSMUSG00000031633 | 8        | 47705991   | 47709847 | Slc25a4            |
| T219   | Fibroadenoma      | 9       | -0.4741       | ENSMUSG00000042865 | 8        | 47728383   | 47728790 | Actb               |
| T219   | Fibroadenoma      | 9       | -0.4741       | ENSMUSG00000071102 | 8        | 47753494   | 47754495 |                    |
| T219   | Fibroadenoma      | 9       | -0.4741       | ENSMUSG00000065103 | 8        | 47770868   | 47770964 | U6                 |
| T219   | Fibroadenoma      | 9       | -0.4741       | ENSMUSG00000047171 | 8        | 47790856   | 47793488 | Helt               |
| T219   | Fibroadenoma      | 9       | -0.4741       | ENSMUSG00000018796 | 8        | 47969859   | 48034867 | Acsl1              |
| T219   | Fibroadenoma      | 9       | -0.4741       | ENSMUSG00000031629 | 8        | 48050872   | 48078824 | Mlf1ip             |
| T219   | Fibroadenoma      | 9       | -0.4741       | ENSMUSG00000038225 | 8        | 48074396   | 48116017 | Ccdc111            |
| T219   | Fibroadenoma      | 9       | -0.4741       | ENSMUSG00000031628 | 8        | 48116235   | 48137523 | Casp3              |
| T219   | Fibroadenoma      | 9       | -0.4741       | ENSMUSG00000031627 | 8        | 48238594   | 48346283 | Irf2               |
| T219   | Fibroadenoma      | 9       | -0.4741       | ENSMUSG00000038173 | 8        | 48485742   | 48593712 | Enpp6              |
| T219   | Fibroadenoma      | 9       | -0.4741       | ENSMUSG00000038143 | 8        | 48684773   | 48788179 | Stox2              |
| T219   | Fibroadenoma      | 9       | -0.4741       | ENSMUSG00000060559 | 8        | 48911946   | 48914178 | ENSMUSG00000060559 |
| T219   | Fibroadenoma      | 9       | -0.4741       | ENSMUSG00000064684 | 8        | 48939235   | 48939368 | SNORA70            |
| T219   | Fibroadenoma      | 9       | -0.4741       | ENSMUSG00000038102 | 8        | 48988943   | 49032287 | D030016E14Rik      |
| T219   | Fibroadenoma      | 9       | -0.4741       | ENSMUSG00000031568 | 8        | 49032509   | 49049544 | Rwdd4a             |
| T219   | Fibroadenoma      | 9       | -0.4741       | ENSMUSG00000064050 | 8        | 49131146   | 49131581 |                    |
| T219   | Fibroadenoma      | 9       | -0.4741       | ENSMUSG00000063049 | 8        | 49165995   | 49173975 | Ing2               |
| T219   | Fibroadenoma      | 9       | -0.4741       | ENSMUSG00000074357 | 8        | 49174209   | 49174535 | Q8BND0_MOUSE       |
| T219   | Fibroadenoma      | 9       | -0.4741       | ENSMUSG00000038069 | 8        | 49208265   | 49212716 | Cdkn2aip           |
| T219   | Fibroadenoma      | 9       | -0.4741       | ENSMUSG00000074356 | 8        | 49212085   | 49213128 | Q3UPZ6_MOUSE       |
| T219   | Fibroadenoma      | 9       | -0.4741       | ENSMUSG00000064508 | 8        | 49218063   | 49218186 | 5S_rRNA            |
| T219   | Fibroadenoma      | 9       | -0.4741       | ENSMUSG00000061974 | 8        | 49320960   | 49321622 |                    |
| T219   | Fibroadenoma      | 9       | -0.4741       | ENSMUSG00000038064 | 8        | 49322776   | 49326188 | Cldn22             |
| T219   | Fibroadenoma      | 9       | -0.4741       | ENSMUSG00000031563 | 8        | 49326412   | 49489389 | Wwc2               |
| T219   | Fibroadenoma      | 9       | -0.4741       | ENSMUSG00000064519 | 8        | 49397999   | 49398111 | 5S_rRNA            |
| T219   | Fibroadenoma      | 9       | -0.4741       | ENSMUSG00000070038 | 8        | 49568931   | 49569445 |                    |
| T219   | Fibroadenoma      | 9       | -0.4741       | ENSMUSG00000031562 | 8        | 49608814   | 49640477 | Dctd               |
| T219   | Fibroadenoma      | 9       | -0.4741       | ENSMUSG00000031561 | 8        | 49727263   | 50173458 | Odz3               |
| T219   | Fibroadenoma      | 9       | -0.4741       | ENSMUSG00000059797 | 8        | 50483589   | 50486068 |                    |
| T219   | Fibroadenoma      | 9       | -0.4741       | ENSMUSG00000074351 | 8        | 50557431   | 50557766 | ENSMUSG00000074351 |
| T219   | Fibroadenoma      | 9       | -0.4741       | ENSMUSG00000050249 | 8        | 50680610   | 50690849 |                    |
| T219   | Fibroadenoma      | 9       | -0.4741       | ENSMUSG00000047204 | 8        | 50684735   | 50685091 |                    |

## Supplementary Table 4. Regions showing copy number alterations in the tumor genome

| Sample | Histological type | segment_id | segment_mean_ratio | gene_id            | chromosome | gene_start | gene_end  | gene_symbol        |
|--------|-------------------|------------|--------------------|--------------------|------------|------------|-----------|--------------------|
| T219   | Fibroadenoma      | 9          | -0.4741            | ENSMUSG00000031559 | 8          | 50962140   | 51000708  | 4930555F03Rik      |
| T219   | Fibroadenoma      | 10         | -0.4132            | ENSMUSG00000065809 | 8          | 52062071   | 52062120  | U7                 |
| T219   | Fibroadenoma      | 10         | -0.4132            | ENSMUSG00000065337 | 8          | 53577302   | 53577444  | U1                 |
| T219   | Fibroadenoma      | 10         | -0.4132            | ENSMUSG00000052825 | 8          | 53694763   | 53695758  | Eif2s2             |
| T219   | Fibroadenoma      | 10         | -0.4132            | ENSMUSG00000057490 | 8          | 53777208   | 53778173  |                    |
| T219   | Fibroadenoma      | 10         | -0.4132            | ENSMUSG00000064682 | 8          | 53835617   | 53835807  | U2                 |
| T219   | Fibroadenoma      | 10         | -0.4132            | ENSMUSG00000077508 | 8          | 54992473   | 54992522  | U7                 |
| T219   | Fibroadenoma      | 10         | -0.4132            | ENSMUSG00000064847 | 8          | 54992563   | 54992612  | U7                 |
| T219   | Fibroadenoma      | 10         | -0.4132            | ENSMUSG00000031521 | 8          | 55010424   | 55022120  | Aga                |
| T219   | Fibroadenoma      | 10         | -0.4132            | ENSMUSG00000039396 | 8          | 55085565   | 55137694  | Neil3              |
| T219   | Fibroadenoma      | 10         | -0.4132            | ENSMUSG00000074349 | 8          | 55410437   | 55411354  |                    |
| T219   | Fibroadenoma      | 10         | -0.4132            | ENSMUSG00000031520 | 8          | 55576304   | 55685794  | Vegfc              |
| T219   | Fibroadenoma      | 10         | -0.4132            | ENSMUSG00000054408 | 8          | 56019131   | 56028680  | Spcs3              |
| T219   | Fibroadenoma      | 10         | -0.4132            | ENSMUSG00000031519 | 8          | 56049028   | 56086533  | Asb5               |
| T219   | Fibroadenoma      | 10         | -0.4132            | ENSMUSG00000031518 | 8          | 56099478   | 56108797  | Spata4             |
| T219   | Fibroadenoma      | 10         | -0.4132            | ENSMUSG00000039375 | 8          | 56128319   | 56223065  | Wdr17              |
| T219   | Fibroadenoma      | 11         | -0.4827            | ENSMUSG00000048829 | 10         | 18790991   | 18791733  |                    |
| T219   | Fibroadenoma      | 12         | -0.5405            | ENSMUSG00000072600 | 14         | 42754735   | 42755200  |                    |
| T219   | Fibroadenoma      | 12         | -0.5405            | ENSMUSG00000072599 | 14         | 42802765   | 42803235  | Ear10              |
| T219   | Fibroadenoma      | 12         | -0.5405            | ENSMUSG00000072319 | 14         | 42821125   | 42821663  | XR_004127.1        |
| T219   | Fibroadenoma      | 12         | -0.5405            | ENSMUSG00000053961 | 14         | 42836936   | 42842939  | Ang5               |
| T219   | Fibroadenoma      | 13         | 0.6738             | ENSMUSG00000047222 | 14         | 50177212   | 50178063  | Ear11              |
| T219   | Fibroadenoma      | 14         | 0.4141             | ENSMUSG00000054940 | 17         | 37912574   | 37913512  | Olfr137            |
| T219   | Fibroadenoma      | 15         | -0.6827            | ENSMUSG00000047632 | 19         | 36982690   | 36984743  | Fgfbp3             |
| T219   | Fibroadenoma      | 16         | -0.7667            | ENSMUSG00000056999 | 19         | 37335574   | 37395757  | Ide                |
| T219   | Fibroadenoma      | 17         | -0.6509            | ENSMUSG00000035299 | X          | 165223769  | 165349841 | Mid1               |
| T219   | Fibroadenoma      | 17         | -0.6509            | ENSMUSG00000072844 | X          | 165322483  | 165322791 | G530011O06Rik      |
| T317   | Fibroadenoma      | 1          | -0.5963            | ENSMUSG00000038209 | 1          | 173354798  | 173371968 | Itln1              |
| T317   | Fibroadenoma      | 1          | -0.5963            | ENSMUSG00000004709 | 1          | 173395868  | 173420260 | Cd244              |
| T317   | Fibroadenoma      | 2          | 0.8753             | ENSMUSG00000055960 | 4          | 111570571  | 111665328 | NP_848901.1        |
| T317   | Fibroadenoma      | 2          | 0.8753             | ENSMUSG00000070868 | 4          | 111733673  | 111796139 | A430090E18Rik      |
| T317   | Fibroadenoma      | 2          | 0.8753             | ENSMUSG00000049972 | 4          | 111883901  | 111931917 | NP_808532.1        |
| T317   | Fibroadenoma      | 2          | 0.8753             | ENSMUSG00000034359 | 4          | 112055126  | 112145772 | OTTMUSG00000008540 |
| T317   | Fibroadenoma      | 2          | 0.8753             | ENSMUSG00000065318 | 4          | 112088704  | 112088810 | U6                 |
| T317   | Fibroadenoma      | 3          | 0.6505             | ENSMUSG00000060264 | 4          | 112453007  | 112454218 |                    |

## Supplementary Table 4. Regions showing copy number alterations in the tumor genome

| Sample | Histological type | segment_id | segment_mean_ratio | gene_id            | chromosome | gene_start | gene_end  | gene_symbol        |
|--------|-------------------|------------|--------------------|--------------------|------------|------------|-----------|--------------------|
| T317   | Fibroadenoma      | 3          | 0.6505             | ENSMUSG00000051602 | 4          | 112476241  | 112477763 |                    |
| T317   | Fibroadenoma      | 4          | -0.4109            | ENSMUSG00000072826 | 5          | 94557031   | 94560596  | XR_004387.1        |
| T317   | Fibroadenoma      | 4          | -0.4109            | ENSMUSG00000070686 | 5          | 94710391   | 94746621  | C87414             |
| T317   | Fibroadenoma      | 5          | 0.8782             | ENSMUSG00000057612 | 6          | 66660970   | 66661878  | V1rc10             |
| T317   | Fibroadenoma      | 6          | -0.6215            | ENSMUSG00000034248 | 14         | 68195176   | 68238400  | Slc25a37           |
| T317   | Fibroadenoma      | 6          | -0.6215            | ENSMUSG00000047977 | 14         | 68243712   | 68247629  | D930020E02Rik      |
| T317   | Fibroadenoma      | 6          | -0.6215            | ENSMUSG00000022066 | 14         | 68290504   | 68320600  | Entpd4             |
| T317   | Fibroadenoma      | 6          | -0.6215            | ENSMUSG00000071316 | 14         | 68343957   | 68344433  | ENSMUSG00000071316 |
| T317   | Fibroadenoma      | 6          | -0.6215            | ENSMUSG00000034205 | 14         | 68344248   | 68428800  | Loxl2              |
| T317   | Fibroadenoma      | 6          | -0.6215            | ENSMUSG00000056640 | 14         | 68393255   | 68393578  | ENSMUSG00000056640 |
| T317   | Fibroadenoma      | 7          | -0.67              | ENSMUSG00000054940 | 17         | 37912574   | 37913512  | Olfr137            |
| T317   | Fibroadenoma      | 7          | -0.67              | ENSMUSG00000062695 | 17         | 37943212   | 37944150  | Olfr136            |
| T317   | Fibroadenoma      | 8          | 0.4457             | ENSMUSG00000025431 | 17         | 39757236   | 39782691  | Crisp1             |
| T326   | Fibroadenoma      | 1          | 0.568              | ENSMUSG00000038209 | 1          | 173354798  | 173371968 | Itln1              |
| T326   | Fibroadenoma      | 1          | 0.568              | ENSMUSG00000004709 | 1          | 173395868  | 173420260 | Cd244              |
| T326   | Fibroadenoma      | 2          | -2.7798            | ENSMUSG00000055960 | 4          | 111570571  | 111665328 | NP_848901.1        |
| T326   | Fibroadenoma      | 2          | -2.7798            | ENSMUSG00000070868 | 4          | 111733673  | 111796139 | A430090E18Rik      |
| T326   | Fibroadenoma      | 2          | -2.7798            | ENSMUSG00000049972 | 4          | 111883901  | 111931917 | NP_808532.1        |
| T326   | Fibroadenoma      | 2          | -2.7798            | ENSMUSG00000034359 | 4          | 112055126  | 112145772 | OTTMUSG00000008540 |
| T326   | Fibroadenoma      | 2          | -2.7798            | ENSMUSG00000065318 | 4          | 112088704  | 112088810 | U6                 |
| T326   | Fibroadenoma      | 3          | -0.5019            | ENSMUSG00000034359 | 4          | 112055126  | 112145772 | OTTMUSG00000008540 |
| T326   | Fibroadenoma      | 3          | -0.5019            | ENSMUSG00000048766 | 4          | 112209079  | 112272798 | A030001H23Rik      |
| T326   | Fibroadenoma      | 4          | -2.4476            | ENSMUSG00000060264 | 4          | 112453007  | 112454218 |                    |
| T326   | Fibroadenoma      | 4          | -2.4476            | ENSMUSG00000051602 | 4          | 112476241  | 112477763 |                    |
| T326   | Fibroadenoma      | 5          | -0.7625            | ENSMUSG00000073763 | 4          | 121480811  | 121493868 | A2AGV1_MOUSE       |
| T326   | Fibroadenoma      | 5          | -0.7625            | ENSMUSG00000073762 | 4          | 121583834  | 121584103 |                    |
| T326   | Fibroadenoma      | 6          | 0.4096             | ENSMUSG00000034248 | 14         | 68195176   | 68238400  | Slc25a37           |
| T326   | Fibroadenoma      | 6          | 0.4096             | ENSMUSG00000047977 | 14         | 68243712   | 68247629  | D930020E02Rik      |
| T326   | Fibroadenoma      | 6          | 0.4096             | ENSMUSG00000022066 | 14         | 68290504   | 68320600  | Entpd4             |
| T326   | Fibroadenoma      | 6          | 0.4096             | ENSMUSG00000071316 | 14         | 68343957   | 68344433  | ENSMUSG00000071316 |
| T326   | Fibroadenoma      | 6          | 0.4096             | ENSMUSG00000034205 | 14         | 68344248   | 68428800  | Loxl2              |
| T326   | Fibroadenoma      | 6          | 0.4096             | ENSMUSG00000056640 | 14         | 68393255   | 68393578  | ENSMUSG00000056640 |
| T326   | Fibroadenoma      | 7          | 0.5875             | ENSMUSG00000035299 | X          | 165223769  | 165349841 | Mid1               |
| T326   | Fibroadenoma      | 7          | 0.5875             | ENSMUSG00000072844 | X          | 165322483  | 165322791 | G530011O06Rik      |
| T352   | Fibroadenoma      | 1          | -0.6384            | ENSMUSG00000038209 | 1          | 173354798  | 173371968 | Itln1              |

## Supplementary Table 4. Regions showing copy number alterations in the tumor genome

| Sample | Histological type | segment_id | segment_mean_ratio | gene_id            | chromosome | gene_start | gene_end  | gene_symbol        |
|--------|-------------------|------------|--------------------|--------------------|------------|------------|-----------|--------------------|
| T352   | Fibroadenoma      | 1          | -0.6384            | ENSMUSG00000004709 | 1          | 173395868  | 173420260 | Cd244              |
| T352   | Fibroadenoma      | 2          | 0.5958             | ENSMUSG00000044138 | 3          | 15348525   | 15551793  | Sirpb1             |
| T352   | Fibroadenoma      | 2          | 0.5958             | ENSMUSG00000074677 | 3          | 15987305   | 16040598  | Sirpb1             |
| T352   | Fibroadenoma      | 3          | 0.4132             | ENSMUSG00000049214 | 4          | 111470967  | 111481052 | NP_808486.1        |
| T352   | Fibroadenoma      | 3          | 0.4132             | ENSMUSG00000055960 | 4          | 111570571  | 111665328 | NP_848901.1        |
| T352   | Fibroadenoma      | 4          | 0.9591             | ENSMUSG00000055960 | 4          | 111570571  | 111665328 | NP_848901.1        |
| T352   | Fibroadenoma      | 4          | 0.9591             | ENSMUSG00000070868 | 4          | 111733673  | 111796139 | A430090E18Rik      |
| T352   | Fibroadenoma      | 4          | 0.9591             | ENSMUSG00000049972 | 4          | 111883901  | 111931917 | NP_808532.1        |
| T352   | Fibroadenoma      | 4          | 0.9591             | ENSMUSG00000034359 | 4          | 112055126  | 112145772 | OTTMUSG00000008540 |
| T352   | Fibroadenoma      | 4          | 0.9591             | ENSMUSG00000065318 | 4          | 112088704  | 112088810 | U6                 |
| T352   | Fibroadenoma      | 5          | 0.7029             | ENSMUSG00000060264 | 4          | 112453007  | 112454218 |                    |
| T352   | Fibroadenoma      | 5          | 0.7029             | ENSMUSG00000051602 | 4          | 112476241  | 112477763 |                    |
| T352   | Fibroadenoma      | 6          | 0.5411             | ENSMUSG00000076042 | 8          | 67406524   | 67406633  | mmu-mir-710        |
| T352   | Fibroadenoma      | 6          | 0.5411             | ENSMUSG00000037852 | 8          | 67484734   | 67585232  | Cpe                |
| T352   | Fibroadenoma      | 6          | 0.5411             | ENSMUSG00000031604 | 8          | 67610337   | 67625770  | Sc4mol             |
| T352   | Fibroadenoma      | 7          | -0.4475            | ENSMUSG00000075297 | 10         | 21972889   | 21976663  |                    |
| T352   | Fibroadenoma      | 8          | -4.2042            | ENSMUSG00000070390 | 11         | 70988256   | 71034514  |                    |
| T352   | Fibroadenoma      | 8          | -4.2042            | ENSMUSG00000077340 | 11         | 71050002   | 71050135  | SNORA17            |
| T352   | Fibroadenoma      | 8          | -4.2042            | ENSMUSG00000040575 | 11         | 71058625   | 71101427  | Nlrp1c             |
| T352   | Fibroadenoma      | 8          | -4.2042            | ENSMUSG00000077632 | 11         | 71104620   | 71104753  | SNORA17            |
| T352   | Fibroadenoma      | 9          | -0.6487            | ENSMUSG00000054940 | 17         | 37912574   | 37913512  | Olfr137            |
| T352   | Fibroadenoma      | 9          | -0.6487            | ENSMUSG00000062695 | 17         | 37943212   | 37944150  | Olfr136            |
| T352   | Fibroadenoma      | 10         | 0.4689             | ENSMUSG00000025431 | 17         | 39757236   | 39782691  | Crisp1             |
| T352   | Fibroadenoma      | 11         | 0.6662             | ENSMUSG00000035299 | X          | 165223769  | 165349841 | Mid1               |
| T352   | Fibroadenoma      | 11         | 0.6662             | ENSMUSG00000072844 | X          | 165322483  | 165322791 | G530011O06Rik      |
| T357   | Fibroadenoma      | 1          | 0.535              | ENSMUSG00000038218 | 1          | 173351908  | 173353597 |                    |
| T357   | Fibroadenoma      | 1          | 0.535              | ENSMUSG00000038209 | 1          | 173354798  | 173371968 | Itln1              |
| T357   | Fibroadenoma      | 1          | 0.535              | ENSMUSG00000004709 | 1          | 173395868  | 173420260 | Cd244              |
| T357   | Fibroadenoma      | 2          | 0.5224             | ENSMUSG00000044138 | 3          | 15348525   | 15551793  | Sirpb1             |
| T357   | Fibroadenoma      | 2          | 0.5224             | ENSMUSG00000074677 | 3          | 15987305   | 16040598  | Sirpb1             |
| T357   | Fibroadenoma      | 3          | 0.8946             | ENSMUSG00000055960 | 4          | 111570571  | 111665328 | NP_848901.1        |
| T357   | Fibroadenoma      | 3          | 0.8946             | ENSMUSG00000070868 | 4          | 111733673  | 111796139 | A430090E18Rik      |
| T357   | Fibroadenoma      | 3          | 0.8946             | ENSMUSG00000049972 | 4          | 111883901  | 111931917 | NP_808532.1        |
| T357   | Fibroadenoma      | 3          | 0.8946             | ENSMUSG00000034359 | 4          | 112055126  | 112145772 | OTTMUSG00000008540 |
| T357   | Fibroadenoma      | 3          | 0.8946             | ENSMUSG00000065318 | 4          | 112088704  | 112088810 | U6                 |



## Supplementary Table 4. Regions showing copy number alterations in the tumor genome

| Sample | Histological type | segment_id | segment_mean_ratio | gene_id            | chromosome | gene_start | gene_end  | gene_symbol   |
|--------|-------------------|------------|--------------------|--------------------|------------|------------|-----------|---------------|
| T357   | Fibroadenoma      | 4          | 0.7488             | ENSMUSG00000060264 | 4          | 112453007  | 112454218 |               |
| T357   | Fibroadenoma      | 4          | 0.7488             | ENSMUSG00000051602 | 4          | 112476241  | 112477763 |               |
| T357   | Fibroadenoma      | 5          | -0.6497            | ENSMUSG00000076466 | 6          | 41043174   | 41043674  | TRBV12-1      |
| T357   | Fibroadenoma      | 5          | -0.6497            | ENSMUSG00000076467 | 6          | 41045643   | 41046075  | TRBV13-1      |
| T357   | Fibroadenoma      | 5          | -0.6497            | ENSMUSG00000076468 | 6          | 41048471   | 41048971  | TRBV12-2      |
| T357   | Fibroadenoma      | 5          | -0.6497            | ENSMUSG00000076469 | 6          | 41051003   | 41051439  | TRBV13-2      |
| T357   | Fibroadenoma      | 5          | -0.6497            | ENSMUSG00000076470 | 6          | 41059754   | 41060192  | TRBV13-3      |
| T357   | Fibroadenoma      | 5          | -0.6497            | ENSMUSG00000076471 | 6          | 41064774   | 41065223  | TRBV14        |
| T357   | Fibroadenoma      | 5          | -0.6497            | ENSMUSG00000076472 | 6          | 41070818   | 41071265  | TRBV15        |
| T357   | Fibroadenoma      | 5          | -0.6497            | ENSMUSG00000076473 | 6          | 41081398   | 41081837  | TRBV16        |
| T357   | Fibroadenoma      | 6          | -0.5394            | ENSMUSG00000071521 | 6          | 41283787   | 41287489  | Try10         |
| T357   | Fibroadenoma      | 6          | -0.5394            | ENSMUSG00000071519 | 6          | 41303421   | 41307204  | Tcrb-V20      |
| T357   | Fibroadenoma      | 6          | -0.5394            | ENSMUSG00000058119 | 6          | 41321996   | 41326810  | EG436523      |
| T357   | Fibroadenoma      | 6          | -0.5394            | ENSMUSG00000059014 | 6          | 41344917   | 41430791  | EG436523      |
| T357   | Fibroadenoma      | 7          | -0.8328            | ENSMUSG00000060441 | 7          | 104139188  | 104161960 |               |
| T357   | Fibroadenoma      | 7          | -0.8328            | ENSMUSG00000066258 | 7          | 104173720  | 104189284 | Trim12        |
| T357   | Fibroadenoma      | 8          | -0.7859            | ENSMUSG00000057596 | 7          | 104345663  | 104381646 | AI451617      |
| T357   | Fibroadenoma      | 8          | -0.7859            | ENSMUSG00000073929 | 7          | 104406780  | 104409147 | EG625321      |
| T357   | Fibroadenoma      | 9          | -0.477             | ENSMUSG00000075297 | 10         | 21972889   | 21976663  |               |
| T357   | Fibroadenoma      | 10         | -0.9597            | ENSMUSG00000070390 | 11         | 70988256   | 71034514  |               |
| T357   | Fibroadenoma      | 10         | -0.9597            | ENSMUSG00000077340 | 11         | 71050002   | 71050135  | SNORA17       |
| T357   | Fibroadenoma      | 10         | -0.9597            | ENSMUSG00000040575 | 11         | 71058625   | 71101427  | Nlrp1c        |
| T357   | Fibroadenoma      | 10         | -0.9597            | ENSMUSG00000077632 | 11         | 71104620   | 71104753  | SNORA17       |
| T357   | Fibroadenoma      | 11         | 0.9424             | ENSMUSG00000071203 | 13         | 101244320  | 101515245 | Birc1-rs1     |
| T357   | Fibroadenoma      | 11         | 0.9424             | ENSMUSG00000021640 | 13         | 101508051  | 101546768 | Naip1         |
| T357   | Fibroadenoma      | 12         | -0.8369            | ENSMUSG00000050982 | 15         | 77304302   | 77318324  | 9030421J09Rik |
| T357   | Fibroadenoma      | 12         | -0.8369            | ENSMUSG00000044309 | 15         | 77352890   | 77357382  | 2210421G13Rik |
| T357   | Fibroadenoma      | 13         | 0.487              | ENSMUSG00000052133 | 16         | 35461109   | 35584353  | Sema5b        |
| T357   | Fibroadenoma      | 14         | -0.8637            | ENSMUSG00000071562 | 16         | 36099373   | 36204610  | Stfa3         |
| T357   | Fibroadenoma      | 15         | -0.7057            | ENSMUSG00000062082 | 16         | 44740228   | 44757396  | Cd200r4       |
| T357   | Fibroadenoma      | 15         | -0.7057            | ENSMUSG00000057827 | 16         | 44786429   | 44835172  | Cd200r2       |
| T357   | Fibroadenoma      | 16         | -2.9937            | ENSMUSG00000073402 | 17         | 35772665   | 35776249  | EG667977      |
| T357   | Fibroadenoma      | 17         | -3.6729            | ENSMUSG00000054940 | 17         | 37912574   | 37913512  | Olfr137       |
| T357   | Fibroadenoma      | 17         | -3.6729            | ENSMUSG00000062695 | 17         | 37943212   | 37944150  | Olfr136       |
| T357   | Fibroadenoma      | 18         | 0.8174             | ENSMUSG00000025431 | 17         | 39757236   | 39782691  | Crisp1        |

## Supplementary Table 4. Regions showing copy number alterations in the tumor genome

| Sample | Histological type | segment_id | segment_mean_ratio | gene_id            | chromosome | gene_start | gene_end  | gene_symbol        |
|--------|-------------------|------------|--------------------|--------------------|------------|------------|-----------|--------------------|
| T357   | Fibroadenoma      | 19         | -0.6712            | ENSMUSG00000056999 | 19         | 37335574   | 37395757  | Ide                |
| T357   | Fibroadenoma      | 20         | -1.1078            | ENSMUSG00000035299 | X          | 165223769  | 165349841 | Mid1               |
| T357   | Fibroadenoma      | 20         | -1.1078            | ENSMUSG00000072844 | X          | 165322483  | 165322791 | G530011O06Rik      |
| T612   | Fibroadenoma      | 1          | -0.6028            | ENSMUSG00000038218 | 1          | 173351908  | 173353597 |                    |
| T612   | Fibroadenoma      | 1          | -0.6028            | ENSMUSG00000038209 | 1          | 173354798  | 173371968 | Itln1              |
| T612   | Fibroadenoma      | 1          | -0.6028            | ENSMUSG00000004709 | 1          | 173395868  | 173420260 | Cd244              |
| T612   | Fibroadenoma      | 2          | 0.8351             | ENSMUSG00000055960 | 4          | 111570571  | 111665328 | NP_848901.1        |
| T612   | Fibroadenoma      | 2          | 0.8351             | ENSMUSG00000070868 | 4          | 111733673  | 111796139 | A430090E18Rik      |
| T612   | Fibroadenoma      | 2          | 0.8351             | ENSMUSG00000049972 | 4          | 111883901  | 111931917 | NP_808532.1        |
| T612   | Fibroadenoma      | 2          | 0.8351             | ENSMUSG00000034359 | 4          | 112055126  | 112145772 | OTTMUSG00000008540 |
| T612   | Fibroadenoma      | 2          | 0.8351             | ENSMUSG00000065318 | 4          | 112088704  | 112088810 | U6                 |
| T612   | Fibroadenoma      | 3          | 0.6158             | ENSMUSG00000060264 | 4          | 112453007  | 112454218 |                    |
| T612   | Fibroadenoma      | 3          | 0.6158             | ENSMUSG00000051602 | 4          | 112476241  | 112477763 |                    |
| T612   | Fibroadenoma      | 4          | 0.5534             | ENSMUSG00000076042 | 8          | 67406524   | 67406633  | mmu-mir-710        |
| T612   | Fibroadenoma      | 4          | 0.5534             | ENSMUSG00000037852 | 8          | 67484734   | 67585232  | Cpe                |
| T612   | Fibroadenoma      | 4          | 0.5534             | ENSMUSG00000031604 | 8          | 67610337   | 67625770  | Sc4mol             |
| T612   | Fibroadenoma      | 5          | 0.5288             | ENSMUSG00000056143 | 18         | 88987949   | 88988281  | Socs6              |
| T612   | Fibroadenoma      | 5          | 0.5288             | ENSMUSG00000056153 | 18         | 89002071   | 89028400  | Socs6              |
| T612   | Fibroadenoma      | 5          | 0.5288             | ENSMUSG00000023066 | 18         | 89105983   | 89265209  | Rttn               |
| T612   | Fibroadenoma      | 5          | 0.5288             | ENSMUSG00000034028 | 18         | 89331620   | 89404520  | Cd226              |
| T612   | Fibroadenoma      | 5          | 0.5288             | ENSMUSG00000043498 | 18         | 89430063   | 89430447  |                    |
| T612   | Fibroadenoma      | 5          | 0.5288             | ENSMUSG00000073514 | 18         | 89435328   | 89903334  | Dok6               |
| T323   | Spindle Cell      | 1          | 0.4875             | ENSMUSG00000038218 | 1          | 173351908  | 173353597 |                    |
| T323   | Spindle Cell      | 1          | 0.4875             | ENSMUSG00000038209 | 1          | 173354798  | 173371968 | Itln1              |
| T323   | Spindle Cell      | 1          | 0.4875             | ENSMUSG00000004709 | 1          | 173395868  | 173420260 | Cd244              |
| T323   | Spindle Cell      | 2          | 0.6219             | ENSMUSG00000028392 | 4          | 61966428   | 61983659  | Bspry              |
| T323   | Spindle Cell      | 2          | 0.6219             | ENSMUSG00000038422 | 4          | 61985373   | 61988575  | Hdhd3              |
| T323   | Spindle Cell      | 2          | 0.6219             | ENSMUSG00000028393 | 4          | 61995531   | 62006424  | Alad               |
| T323   | Spindle Cell      | 3          | 0.6511             | ENSMUSG00000076042 | 8          | 67406524   | 67406633  | mmu-mir-710        |
| T323   | Spindle Cell      | 3          | 0.6511             | ENSMUSG00000037852 | 8          | 67484734   | 67585232  | Cpe                |
| T323   | Spindle Cell      | 3          | 0.6511             | ENSMUSG00000031604 | 8          | 67610337   | 67625770  | Sc4mol             |
| T323   | Spindle Cell      | 4          | -0.5674            | ENSMUSG00000075297 | 10         | 21972889   | 21976663  |                    |
| T323   | Spindle Cell      | 5          | -0.6782            | ENSMUSG00000055072 | 11         | 79112380   | 79112814  | ENSMUSG00000055072 |
| T323   | Spindle Cell      | 5          | -0.6782            | ENSMUSG00000020716 | 11         | 79156087   | 79397804  | Nf1                |
| T323   | Spindle Cell      | 5          | -0.6782            | ENSMUSG00000049612 | 11         | 79317547   | 79320214  | Omg                |

## Supplementary Table 4. Regions showing copy number alterations in the tumor genome

| Sample | Histological type | segment | segment_mean_ | gene_id            | chromoso | gene_start | gene_end  | gene_symbol   |
|--------|-------------------|---------|---------------|--------------------|----------|------------|-----------|---------------|
|        |                   | _id     | ratio         |                    | me       |            |           |               |
| T323   | Spindle Cell      | 5       | -0.6782       | ENSMUSG00000070354 | 11       | 79329580   | 79346783  | Evi2a         |
| T323   | Spindle Cell      | 5       | -0.6782       | ENSMUSG00000017639 | 11       | 79407407   | 79514217  | Rab11fip4     |
| T323   | Spindle Cell      | 5       | -0.6782       | ENSMUSG00000064486 | 11       | 79411363   | 79411463  | U6            |
| T323   | Spindle Cell      | 5       | -0.6782       | ENSMUSG00000077574 | 11       | 79455217   | 79455323  | U6            |
| T323   | Spindle Cell      | 6       | -0.6405       | ENSMUSG00000020988 | 12       | 70609049   | 70643423  | L2hgdh        |
| T323   | Spindle Cell      | 6       | -0.6405       | ENSMUSG00000054894 | 12       | 70643567   | 70663263  | Atp5s         |
| T323   | Spindle Cell      | 6       | -0.6405       | ENSMUSG00000020990 | 12       | 70665453   | 70709312  | Cdkl1         |
| T323   | Spindle Cell      | 6       | -0.6405       | ENSMUSG00000076065 | 12       | 70682440   | 70682549  | mmu-mir-681   |
| T323   | Spindle Cell      | 6       | -0.6405       | ENSMUSG00000020992 | 12       | 70708893   | 70713116  | 4930512B01Rik |
| T323   | Spindle Cell      | 6       | -0.6405       | ENSMUSG00000034761 | 12       | 70722355   | 70811768  | Map4k5        |
| T323   | Spindle Cell      | 6       | -0.6405       | ENSMUSG00000021066 | 12       | 70811874   | 70882636  | Spg3a         |
| T323   | Spindle Cell      | 6       | -0.6405       | ENSMUSG00000065327 | 12       | 70849509   | 70849810  | 7SK           |
| T323   | Spindle Cell      | 6       | -0.6405       | ENSMUSG00000021067 | 12       | 70883617   | 70905607  | Sav1          |
| T323   | Spindle Cell      | 7       | -0.5698       | ENSMUSG00000076708 | 12       | 115393758  | 115394051 | IGHV1-43      |
| T323   | Spindle Cell      | 7       | -0.5698       | ENSMUSG00000076709 | 12       | 115438916  | 115439209 | IGHV1-47      |
| T323   | Spindle Cell      | 7       | -0.5698       | ENSMUSG00000076710 | 12       | 115503031  | 115503324 | IGHV1-49      |
| T323   | Spindle Cell      | 8       | -0.5084       | ENSMUSG00000047632 | 19       | 36982690   | 36984743  | Fgfbp3        |
| T323   | Spindle Cell      | 9       | -0.5778       | ENSMUSG00000056999 | 19       | 37335574   | 37395757  | Ide           |

Trp53 sequencing primers

| <i>Trp53</i> exon | 5p outer                  | 3p outer                   | 5p inner                                    | 3p inner                           |
|-------------------|---------------------------|----------------------------|---------------------------------------------|------------------------------------|
| e1a               | AAAAGAACTTAGGGGCCGTG      | GATGGTCCAATGAACTGAAGC      | TGTA AACGACGGCCAGTACTTAGGGGCCGTGTTGGTT      | CAGGAAACAGCTATGACCGGTCCAATGAACTC   |
| e1b               | TGCCCTTACTTGTTATGGCGA     | CCCCACGGTTTTCTCTAGTTTTATG  | TGTA AACGACGGCCAGTTTGTATGGCGACTATCCAGCTT    | CAGGAAACAGCTATGACCGGTTTTTCTCTAGTTI |
| e2                | CCTTTCCTATAAGCCATAGGGGTTT | CCATACCATGTTTGAACACTACTGT  | TGTA AACGACGGCCAGTAAAGCCATAGGGGTTTGTGTT     | CAGGAAACAGCTATGACCGTTTTCTCTCAGGCAA |
| e3                | AGGGTCTCAGAAGTTTGAGGTCAT  | AAAGAAGAACCCTCAGGACTGTGTT  | TGTA AACGACGGCCAGTAAAGTTTGAGGTCATCATTGACTAC | CAGGAAACAGCTATGACCAACCCTCAGGACTGT  |
| e4                | CCAGAGCAGAAAGGGACTTGG     | GAAGAGGAACCCCAAATCTAGAC    | TGTA AACGACGGCCAGTAAAGGGACTTGGGCTTTGGT      | CAGGAAACAGCTATGACCGGAACCCCAAATCT   |
| e5                | CAATGTGTTTCATTAGTTCCCCAC  | CAGGCCTAAGAGCAAGAATAAGTCA  | TGTA AACGACGGCCAGTTCATTAGTTCCCCACCTTGACAC   | CAGGAAACAGCTATGACCGCAAGAATAAGTCA   |
| e6                | GATGGTAAGCCCTCAACACCG     | CGGGTTGCTAGAAAGTCAACATC    | TGTA AACGACGGCCAGTAAAGCCCTCAACACCGCTGTG     | CAGGAAACAGCTATGACCGTTGCTAGAAAGTC/  |
| e7                | GAGGCTATAGCCAGCCATTCC     | GCGGGACTCGTGGAACAGAAA      | TGTA AACGACGGCCAGTATAGCCAGCCATTCCCGGCTG     | CAGGAAACAGCTATGACCACTCGTGGAACAGA/  |
| e8                | TGGGGGCTAGTTTACACACA      | GTGAAATACTCTCCATCAAGTGGTT  | TGTA AACGACGGCCAGTCTAGTTTACACACAGTCAGGATGG  | CAGGAAACAGCTATGACCGCTGTGGAAGGAG    |
| e9                | GAGCGCAAAGAGAGGTACGCA     | CTGGCAACCTGCTAATAACTACTATT | TGTA AACGACGGCCAGTAAAGAGAGGTACGCAGGCGGG     | CAGGAAACAGCTATGACCATTTTATACATGCGA/ |
| e10               | CCAGCTTAAGTTGGGAACCAA     | ATCTTCACTACAAGGCTGAG       | TGTA AACGACGGCCAGTGGGAACCACTTTCAGAAAGAAAG   | CAGGAAACAGCTATGACCTCACTACAAGGCTG   |
| e11a              | TCCAGCCTAGAGCCTTCCAAG     | CAGGCTTTCAGAAATGGAAGG      | TGTA AACGACGGCCAGTAGAGCCTTCCAAGCCTTGATC     | CAGGAAACAGCTATGACCGCTTTCAGAAATGG/  |
| e11b              | CCAGTTGTTGGACCTGGCAC      | GTGGGTACCTCCAAATTCATC      | TGTA AACGACGGCCAGTGTGGACCTGGCACCTACAA       | CAGGAAACAGCTATGACCTACCTCCAAATTCAT  |
